# Supplementary material
Source: publisher figshare collection journal article supplement (https://gsajournals.figshare.com/ndownloader/files/28302063)
Supplement: Supplementary file 1 [file 28302063]

## Sheet: Lesion Diameter (mm)
Population	Accession	Alias	Unique_Subsample	Days_Post_Inoculation	Lesion_Diameter
Multifamily	18B168P010	18B168P010	18B168P010	4	2
Multifamily	18C346P006	18C346P006	18C346P006	4	1.5
Multifamily	18C343P033	18C343P033	18C343P033	4	2.5
Multifamily	18C346P006	18C346P006	18C346P006_1	4	1.5
Multifamily	18C343P012	18C343P012	18C343P012	4	1.5
Multifamily	18C346P012	18C346P012	18C346P012	4	2.5
Multifamily	18C346P005	18C346P005	18C346P005	4	2.5
Multifamily	18C346P024	18C346P024	18C346P024	4	2.5
Multifamily	18C343P004	18C343P004	18C343P004	4	2.5
Multifamily	18C346P005	18C346P005	18C346P005_1	4	3.5
Multifamily	18C346P032	18C346P032	18C346P032	4	3
Multifamily	18C346P024	18C346P024	18C346P024_1	4	2.5
Multifamily	18C347P058	18C347P058	18C347P058	4	3.5
Multifamily	18C346P032	18C346P032	18C346P032_1	4	3.5
Multifamily	18B168P006	18B168P006	18B168P006	4	2.5
Multifamily	18B168P010	18B168P010	18B168P010_1	4	2.5
Multifamily	18C343P015	18C343P015	18C343P015	4	2.5
Multifamily	18C343P015	18C343P015	18C343P015_1	4	2
Multifamily	18C343P040	18C343P040	18C343P040	4	2.5
Multifamily	18C346P039	18C346P039	18C346P039	4	4
Multifamily	18C343P019	18C343P019	18C343P019	4	2.5
Multifamily	18C346P086	18C346P086	18C346P086	4	2.5
Multifamily	18C342P032	18C342P032	18C342P032	4	2
Multifamily	18C346P026	18C346P026	18C346P026	4	3
Multifamily	18C347P011	18C347P011	18C347P011	4	3.5
Multifamily	18C346P010	18C346P010	18C346P010	4	2.5
Multifamily	18C346P003	18C346P003	18C346P003	4	2
Multifamily	18C347P076	18C347P076	18C347P076	4	3.5
Multifamily	18C346P037	18C346P037	18C346P037	4	4
Multifamily	18C342P075	18C342P075	18C342P075	4	2.5
Multifamily	18C346P006	18C346P006	18C346P006_2	4	2.5
Multifamily	18C346P010	18C346P010	18C346P010_1	4	2
Multifamily	18C346P016	18C346P016	18C346P016	4	3
Multifamily	18C346P025	18C346P025	18C346P025	4	2.5
Multifamily	18C342P089	18C342P089	18C342P089	4	2.5
Multifamily	18C343P040	18C343P040	18C343P040_1	4	3
Multifamily	18C347P045	18C347P045	18C347P045	4	2
Multifamily	18C347P022	18C347P022	18C347P022	4	2.5
Multifamily	18C346P070	18C346P070	18C346P070	4	3.5
Multifamily	18C346P074	18C346P074	18C346P074	4	3.5
Multifamily	18C347P070	18C347P070	18C347P070	4	2.5
Multifamily	18C343P042	18C343P042	18C343P042	4	2.5
Multifamily	18C347P036	18C347P036	18C347P036	4	3
Multifamily	18C347P032	18C347P032	18C347P032	4	2.5
Multifamily	18C346P066	18C346P066	18C346P066	4	3
Multifamily	18C342P071	18C342P071	18C342P071	4	2
Multifamily	18C343P044	18C343P044	18C343P044	4	2
Multifamily	18C343P069	18C343P069	18C343P069	4	2.5
Multifamily	18C346P024	18C346P024	18C346P024_2	4	3.5
Multifamily	18C347P058	18C347P058	18C347P058_1	4	2
Multifamily	18C346P034	18C346P034	18C346P034	4	3.5
Multifamily	18C346P012	18C346P012	18C346P012_1	4	2.5
Multifamily	18C346P034	18C346P034	18C346P034_1	4	2
Multifamily	18C343P067	18C343P067	18C343P067	4	2.5
Multifamily	18B168P011	18B168P011	18B168P011	4	2
Multifamily	18C346P068	18C346P068	18C346P068	4	2
Multifamily	18C342P068	18C342P068	18C342P068	4	2
Multifamily	18C342P047	18C342P047	18C342P047	4	2.5
Multifamily	18C342P062	18C342P062	18C342P062	4	2
Multifamily	18C346P034	18C346P034	18C346P034_2	4	2.5
Multifamily	18C342P024	18C342P024	18C342P024	4	3.5
Multifamily	18C346P045	18C346P045	18C346P045	4	2.5
Multifamily	18C342P015	18C342P015	18C342P015	4	3
Multifamily	18C343P040	18C343P040	18C343P040_2	4	3
Multifamily	18C343P022	18C343P022	18C343P022	4	4
Multifamily	18C343P071	18C343P071	18C343P071	4	4
Multifamily	18C343P072	18C343P072	18C343P072	4	3.5
Multifamily	18C347P042	18C347P042	18C347P042	4	2.5
Multifamily	18C342P074	18C342P074	18C342P074	4	2.5
Multifamily	18C346P025	18C346P025	18C346P025_1	4	2.5
Multifamily	18C346P010	18C346P010	18C346P010_2	4	2.5
Multifamily	18C346P016	18C346P016	18C346P016_1	4	4
Multifamily	18C346P081	18C346P081	18C346P081	4	3.5
Multifamily	18C347P068	18C347P068	18C347P068	4	3.5
Multifamily	18C347P070	18C347P070	18C347P070_1	4	5
Multifamily	18C342P074	18C342P074	18C342P074_1	4	3
Multifamily	18C343P040	18C343P040	18C343P040_3	4	2.5
Multifamily	18C346P039	18C346P039	18C346P039_1	4	3
Multifamily	18C347P007	18C347P007	18C347P007	4	2.5
Multifamily	18C343P025	18C343P025	18C343P025	4	3
Multifamily	18C346P092	18C346P092	18C346P092	4	3.5
Multifamily	18C346P003	18C346P003	18C346P003_1	4	3
Multifamily	18C347P058	18C347P058	18C347P058_2	4	2.5
Multifamily	18C342P073	18C342P073	18C342P073	4	2.5
Multifamily	18C342P070	18C342P070	18C342P070	4	2.5
Multifamily	18C347P088	18C347P088	18C347P088	4	2.5
Multifamily	18C342P041	18C342P041	18C342P041	4	2
Multifamily	18C346P034	18C346P034	18C346P034_3	4	4
Multifamily	18C342P025	18C342P025	18C342P025	4	3.5
Multifamily	18C342P089	18C342P089	18C342P089_1	4	2.5
Multifamily	18C346P038	18C346P038	18C346P038	4	2
Multifamily	18C342P075	18C342P075	18C342P075_1	4	3.5
Multifamily	18C343P033	18C343P033	18C343P033_1	4	2.5
Multifamily	18C343P019	18C343P019	18C343P019_1	4	3
Multifamily	18C343P069	18C343P069	18C343P069_1	4	1.5
Multifamily	18C343P056	18C343P056	18C343P056	4	3
Multifamily	18C347P039	18C347P039	18C347P039	4	4
Multifamily	18B168P017	18B168P017	18B168P017	4	1.5
Multifamily	18C346P062	18C346P062	18C346P062	4	2
Multifamily	18C346P077	18C346P077	18C346P077	4	2
Multifamily	18C346P010	18C346P010	18C346P010_3	4	2.5
Multifamily	18C346P079	18C346P079	18C346P079	4	2.5
Multifamily	18C342P054	18C342P054	18C342P054	4	2
Multifamily	18C343P005	18C343P005	18C343P005	4	2
Multifamily	18C343P082	18C343P082	18C343P082	4	2.5
Multifamily	18C347P088	18C347P088	18C347P088_1	4	3.5
Multifamily	18C342P038	18C342P038	18C342P038	4	3.5
Multifamily	18C347P095	18C347P095	18C347P095	4	3.5
Multifamily	18C343P052	18C343P052	18C343P052	4	4
Multifamily	18C342P013	18C342P013	18C342P013	4	3.5
Multifamily	18C346P039	18C346P039	18C346P039_2	4	3
Multifamily	18C342P076	18C342P076	18C342P076	4	4
Multifamily	18C342P078	18C342P078	18C342P078	4	3
Multifamily	18C343P030	18C343P030	18C343P030	4	3
Multifamily	18C343P028	18C343P028	18C343P028	4	4.5
Multifamily	18C343P065	18C343P065	18C343P065	4	5.5
Multifamily	18C343P070	18C343P070	18C343P070	4	3.5
Multifamily	18C343P057	18C343P057	18C343P057	4	3
Multifamily	18B168P018	18B168P018	18B168P018	4	3
Multifamily	18C346P053	18C346P053	18C346P053	4	4
Multifamily	18C346P070	18C346P070	18C346P070_1	4	3
Multifamily	18C346P075	18C346P075	18C346P075	4	2
Multifamily	18C346P010	18C346P010	18C346P010_4	4	3
Multifamily	18C346P004	18C346P004	18C346P004	4	3
Multifamily	18C346P016	18C346P016	18C346P016_2	4	3.5
Multifamily	18B168P075	18B168P075	18B168P075	4	3
Multifamily	18C347P047	18C347P047	18C347P047	4	3
Multifamily	18C342P070	18C342P070	18C342P070_1	4	2.5
Multifamily	18C342P070	18C342P070	18C342P070_2	4	2.5
Multifamily	18C343P080	18C343P080	18C343P080	4	2.5
Multifamily	18C342P062	18C342P062	18C342P062_1	4	3
Multifamily	18C342P028	18C342P028	18C342P028	4	4.5
Multifamily	18C342P019	18C342P019	18C342P019	4	3
Multifamily	18C343P038	18C343P038	18C343P038	4	2.5
Multifamily	18C343P040	18C343P040	18C343P040_4	4	3
Multifamily	18C346P041	18C346P041	18C346P041	4	3.5
Multifamily	18C343P032	18C343P032	18C343P032	4	2.5
Multifamily	18C343P025	18C343P025	18C343P025_1	4	3.5
Multifamily	18C343P067	18C343P067	18C343P067_1	4	2.5
Multifamily	18C347P029	18C347P029	18C347P029	4	2.5
Multifamily	18C347P024	18C347P024	18C347P024	4	2.5
Multifamily	18C346P077	18C346P077	18C346P077_1	4	2
Multifamily	18C346P010	18C346P010	18C346P010_5	4	2
Multifamily	18C346P004	18C346P004	18C346P004_1	4	2
Multifamily	18C347P046	18C347P046	18C347P046	4	2
Multifamily	18C342P070	18C342P070	18C342P070_3	4	2
Multifamily	18C343P009	18C343P009	18C343P009	4	2.5
Multifamily	18C346P026	18C346P026	18C346P026_1	4	2
Multifamily	18C346P045	18C346P045	18C346P045_1	4	3.5
Multifamily	18C346P049	18C346P049	18C346P049	4	3
Multifamily	18C342P090	18C342P090	18C342P090	4	3
Multifamily	18C342P089	18C342P089	18C342P089_2	4	2.5
Multifamily	18C346P043	18C346P043	18C346P043	4	3
Multifamily	18C342P075	18C342P075	18C342P075_2	4	2
Multifamily	18C343P028	18C343P028	18C343P028_1	4	4
Multifamily	18C343P026	18C343P026	18C343P026	4	2
Multifamily	18C347P064	18C347P064	18C347P064	4	3.5
Multifamily	18C342P067	18C342P067	18C342P067	4	3
Multifamily	18C346P026	18C346P026	18C346P026_2	4	3.5
Multifamily	18C342P019	18C342P019	18C342P019_1	4	2
Multifamily	18C342P012	18C342P012	18C342P012	4	2.5
Multifamily	18C343P043	18C343P043	18C343P043	4	2
Multifamily	18C346P040	18C346P040	18C346P040	4	3
Multifamily	18C343P098	18C343P098	18C343P098	4	2.5
Multifamily	18C343P097	18C343P097	18C343P097	4	3.5
Multifamily	18C343P034	18C343P034	18C343P034	4	2.5
Multifamily	18C343P028	18C343P028	18C343P028_2	4	3
Multifamily	18C343P067	18C343P067	18C343P067_2	4	2.5
Multifamily	18C346P097	18C346P097	18C346P097	4	4
Multifamily	18C347P040	18C347P040	18C347P040	4	3
Multifamily	18C346P055	18C346P055	18C346P055	4	3
Multifamily	18C346P064	18C346P064	18C346P064	4	2
Multifamily	18C346P068	18C346P068	18C346P068_1	4	2.5
Multifamily	18C346P067	18C346P067	18C346P067	4	4
Multifamily	18C346P086	18C346P086	18C346P086_1	4	3
Multifamily	18C346P079	18C346P079	18C346P079_1	4	2
Multifamily	18C347P064	18C347P064	18C347P064_1	4	3.5
Multifamily	18C347P064	18C347P064	18C347P064_2	4	3.5
Multifamily	18C347P065	18C347P065	18C347P065	4	3
Multifamily	18C347P070	18C347P070	18C347P070_2	4	3.5
Multifamily	18C347P058	18C347P058	18C347P058_3	4	1.5
Multifamily	18C347P048	18C347P048	18C347P048	4	2.5
Multifamily	18C347P049	18C347P049	18C347P049	4	2.5
Multifamily	18C343P009	18C343P009	18C343P009_1	4	2
Multifamily	18C343P088	18C343P088	18C343P088	4	2.5
Multifamily	18C343P080	18C343P080	18C343P080_1	4	3.5
Multifamily	18C347P091	18C347P091	18C347P091	4	2.5
Multifamily	18C343P011	18C343P011	18C343P011	4	2.5
Multifamily	18C346P034	18C346P034	18C346P034_4	4	2.5
Multifamily	18C346P032	18C346P032	18C346P032_2	4	3.5
Multifamily	18C342P025	18C342P025	18C342P025_1	4	2.5
Multifamily	18C342P014	18C342P014	18C342P014	4	3.5
Multifamily	18C343P038	18C343P038	18C343P038_1	4	4
Multifamily	18C343P043	18C343P043	18C343P043_1	4	2.5
Multifamily	18C346P036	18C346P036	18C346P036	4	3
Multifamily	18C346P040	18C346P040	18C346P040_1	4	1.5
Multifamily	18C346P041	18C346P041	18C346P041_1	4	3.5
Multifamily	18C346P038	18C346P038	18C346P038_1	4	3
Multifamily	18C346P037	18C346P037	18C346P037_1	4	4
Multifamily	18C346P039	18C346P039	18C346P039_3	4	2.5
Multifamily	18C342P002	18C342P002	18C342P002	4	2
Multifamily	18C342P082	18C342P082	18C342P082	4	3.5
Multifamily	18C342P077	18C342P077	18C342P077	4	2
Multifamily	18B168P039	18B168P039	18B168P039	4	2
Multifamily	18B168P031	18B168P031	18B168P031	4	2
Multifamily	18C343P066	18C343P066	18C343P066	4	5
Multifamily	18C347P036	18C347P036	18C347P036_1	4	3.5
Multifamily	18C347P027	18C347P027	18C347P027	4	3
Multifamily	18C347P024	18C347P024	18C347P024_1	4	2
Multifamily	18C346P077	18C346P077	18C346P077_2	4	3.5
Multifamily	18B168P070	18B168P070	18B168P070	4	2.5
Multifamily	18C347P080	18C347P080	18C347P080	4	3
Multifamily	18C343P076	18C343P076	18C343P076	4	3.5
Multifamily	18C342P065	18C342P065	18C342P065	4	4
Multifamily	18C342P031	18C342P031	18C342P031	4	3
Multifamily	18C343P053	18C343P053	18C343P053	4	2
Multifamily	18C343P097	18C343P097	18C343P097_1	4	3.5
Multifamily	18C343P022	18C343P022	18C343P022_1	4	3
Multifamily	18C343P066	18C343P066	18C343P066_1	4	4.5
Multifamily	18C347P042	18C347P042	18C347P042_1	4	3
Multifamily	18C347P045	18C347P045	18C347P045_1	4	4
Multifamily	18C346P069	18C346P069	18C346P069	4	4
Multifamily	18C346P022	18C346P022	18C346P022	4	2.5
Multifamily	18C346P012	18C346P012	18C346P012_2	4	2
Multifamily	18C346P089	18C346P089	18C346P089	4	2.5
Multifamily	18C346P079	18C346P079	18C346P079_2	4	2.5
Multifamily	18B168P079	18B168P079	18B168P079	4	3
Multifamily	18C347P072	18C347P072	18C347P072	4	3
Multifamily	18C347P069	18C347P069	18C347P069	4	2.5
Multifamily	18C347P063	18C347P063	18C347P063	4	3.5
Multifamily	18C347P048	18C347P048	18C347P048_1	4	3
Multifamily	18C347P091	18C347P091	18C347P091_1	4	3
Multifamily	18C347P087	18C347P087	18C347P087	4	2.5
Multifamily	18C342P033	18C342P033	18C342P033	4	2.5
Multifamily	18C346P026	18C346P026	18C346P026_3	4	3.5
Multifamily	18C346P050	18C346P050	18C346P050	4	2.5
Multifamily	18C342P007	18C342P007	18C342P007	4	3.5
Multifamily	18C342P080	18C342P080	18C342P080	4	2.5
Multifamily	18C343P099	18C343P099	18C343P099	4	3
Multifamily	18C343P037	18C343P037	18C343P037	4	4
Multifamily	18C343P029	18C343P029	18C343P029	4	2
Multifamily	18C343P067	18C343P067	18C343P067_3	4	4
Multifamily	18C343P069	18C343P069	18C343P069_2	4	2
Multifamily	18C343P057	18C343P057	18C343P057_1	4	3
Multifamily	18C347P045	18C347P045	18C347P045_2	4	5.5
Multifamily	18C346P053	18C346P053	18C346P053_1	4	3.5
Multifamily	18C346P062	18C346P062	18C346P062_1	4	3
Multifamily	18C346P068	18C346P068	18C346P068_2	4	2.5
Multifamily	18C346P024	18C346P024	18C346P024_3	4	3
Multifamily	18C346P023	18C346P023	18C346P023	4	2.5
Multifamily	18C347P064	18C347P064	18C347P064_3	4	4
Multifamily	18C347P060	18C347P060	18C347P060	4	5
Multifamily	18C346P041	18C346P041	18C346P041_2	4	NA
Multifamily	18B168P041	18B168P041	18B168P041	4	1.5
Multifamily	18C343P067	18C343P067	18C343P067_4	4	2.5
Multifamily	18C343P069	18C343P069	18C343P069_3	4	2
Multifamily	18C346P099	18C346P099	18C346P099	4	2
Multifamily	18C346P099	18C346P099	18C346P099_1	4	2.5
Multifamily	18C347P028	18C347P028	18C347P028	4	2.5
Multifamily	18C347P024	18C347P024	18C347P024_2	4	2.5
Multifamily	18C347P018	18C347P018	18C347P018	4	2
Multifamily	18C346P062	18C346P062	18C346P062_2	4	2
Multifamily	18C347P064	18C347P064	18C347P064_4	4	3
Multifamily	18C347P048	18C347P048	18C347P048_2	4	3
Multifamily	18C347P048	18C347P048	18C347P048_3	4	3.5
Multifamily	18C343P008	18C343P008	18C343P008	4	2
Multifamily	18C342P100	18C342P100	18C342P100	4	2.5
Multifamily	18C342P099	18C342P099	18C342P099	4	3.5
Multifamily	05C197P002	05C197P002	05C197P002	4	2
Multifamily	18C343P089	18C343P089	18C343P089	4	2.5
Multifamily	18C343P076	18C343P076	18C343P076_1	4	4.5
Multifamily	18C343P076	18C343P076	18C343P076_2	4	3.5
Multifamily	18C346P029	18C346P029	18C346P029	4	2.5
Multifamily	18C343P052	18C343P052	18C343P052_1	4	3.5
Multifamily	18C343P053	18C343P053	18C343P053_1	4	3
Multifamily	18C346P046	18C346P046	18C346P046	4	2.5
Multifamily	18C346P045	18C346P045	18C346P045_2	4	3.5
Multifamily	18C346P044	18C346P044	18C346P044	4	2
Multifamily	18C346P050	18C346P050	18C346P050_1	4	3.5
Multifamily	18C342P091	18C342P091	18C342P091	4	4.5
Multifamily	18C346P038	18C346P038	18C346P038_2	4	2.5
Multifamily	18B168P001	18B168P001	18B168P001	4	2
Multifamily	18C342P003	18C342P003	18C342P003	4	2.5
Multifamily	18C342P008	18C342P008	18C342P008	4	3
Multifamily	18C342P077	18C342P077	18C342P077_1	4	2
Multifamily	18C343P097	18C343P097	18C343P097_2	4	4
Multifamily	18C343P025	18C343P025	18C343P025_2	4	4
Multifamily	18B168P036	18B168P036	18B168P036	4	2.5
Multifamily	18C343P065	18C343P065	18C343P065_1	4	5
Multifamily	18C343P061	18C343P061	18C343P061	4	2.5
Multifamily	18C343P056	18C343P056	18C343P056_1	4	3
Multifamily	18C343P056	18C343P056	18C343P056_2	4	3
Multifamily	18C346P092	18C346P092	18C346P092_1	4	3.5
Multifamily	18C347P045	18C347P045	18C347P045_3	4	4.5
Multifamily	18B168P018	18B168P018	18B168P018_1	4	2.5
Multifamily	18C346P056	18C346P056	18C346P056	4	3
Multifamily	18C346P062	18C346P062	18C346P062_3	4	4
Multifamily	18C346P021	18C346P021	18C346P021	4	2.5
Multifamily	18C346P086	18C346P086	18C346P086_2	4	6
Multifamily	18B168P081	18B168P081	18B168P081	4	2.5
Multifamily	18B168P076	18B168P076	18B168P076	4	4
Multifamily	18C347P064	18C347P064	18C347P064_5	4	4
Multifamily	18C343P002	18C343P002	18C343P002	4	3
Multifamily	18B168P066	18B168P066	18B168P066	4	2.5
Multifamily	18C347P082	18C347P082	18C347P082	4	2.5
Multifamily	18C347P096	18C347P096	18C347P096	4	3.5
Multifamily	18C343P015	18C343P015	18C343P015_2	4	2.5
Multifamily	18C342P066	18C342P066	18C342P066	4	3
Multifamily	18C346P032	18C346P032	18C346P032_3	4	3
Multifamily	18C346P026	18C346P026	18C346P026_4	4	2
Multifamily	18C346P029	18C346P029	18C346P029_1	4	2.5
Multifamily	18C346P040	18C346P040	18C346P040_2	4	4
Multifamily	18C346P040	18C346P040	18C346P040_3	4	3
Multifamily	18C346P039	18C346P039	18C346P039_4	4	2.5
Multifamily	18C343P099	18C343P099	18C343P099_1	4	3
Multifamily	18C343P021	18C343P021	18C343P021	4	3.5
Multifamily	18B168P047	18B168P047	18B168P047	4	1.5
Multifamily	18C343P072	18C343P072	18C343P072_1	4	2
Multifamily	18C343P061	18C343P061	18C343P061_1	4	4
Multifamily	18C343P056	18C343P056	18C343P056_3	4	3
Multifamily	18C346P093	18C346P093	18C346P093	4	3
Multifamily	18C347P041	18C347P041	18C347P041	4	3
Multifamily	18C347P042	18C347P042	18C347P042_2	4	4
Multifamily	18C347P032	18C347P032	18C347P032_1	4	2.5
Multifamily	18B168P018	18B168P018	18B168P018_2	4	2
Multifamily	18C346P066	18C346P066	18C346P066_1	4	3
Multifamily	18C346P068	18C346P068	18C346P068_3	4	3
Multifamily	18C346P004	18C346P004	18C346P004_2	4	2.5
Multifamily	18C346P082	18C346P082	18C346P082	4	3
Multifamily	18B168P069	18B168P069	18B168P069	4	3
Multifamily	18C347P075	18C347P075	18C347P075	4	3.5
Multifamily	18C347P057	18C347P057	18C347P057	4	2.5
Multifamily	18C342P059	18C342P059	18C342P059	4	2
Multifamily	18B168P023	18B168P023	18B168P023	4	2
Multifamily	08C123P001	UCD_Royal_Royce	08C123P001	4	3
Multifamily	05C197P002	05C197P002	05C197P002_1	4	2
Multifamily	08C123P001	UCD_Royal_Royce	08C123P001_1	4	2
Multifamily	18C343P081	18C343P081	18C343P081	4	2.5
Multifamily	18C343P076	18C343P076	18C343P076_3	4	3.5
Multifamily	18C343P079	18C343P079	18C343P079	4	2.5
Multifamily	18C342P050	18C342P050	18C342P050	4	2.5
Multifamily	18C342P040	18C342P040	18C342P040	4	4
Multifamily	18C347P097	18C347P097	18C347P097	4	3
Multifamily	18C343P016	18C343P016	18C343P016	4	4
Multifamily	18C346P033	18C346P033	18C346P033	4	2.5
Multifamily	18C343P054	18C343P054	18C343P054	4	2.5
Multifamily	18C346P050	18C346P050	18C346P050_2	4	2.5
Multifamily	18C342P089	18C342P089	18C342P089_3	4	4.5
Multifamily	18C342P009	18C342P009	18C342P009	4	4
Multifamily	18C343P041	18C343P041	18C343P041	4	5
Multifamily	18B168P004	18B168P004	18B168P004	4	2
Multifamily	18C342P008	18C342P008	18C342P008_1	4	2.5
Multifamily	18C343P022	18C343P022	18C343P022_2	4	3.5
Multifamily	18C343P026	18C343P026	18C343P026_1	4	3.5
Multifamily	18C346P093	18C346P093	18C346P093_1	4	4.5
Multifamily	18C347P042	18C347P042	18C347P042_3	4	2.5
Multifamily	18C347P028	18C347P028	18C347P028_1	4	2.5
Multifamily	18C347P015	18C347P015	18C347P015	4	3.5
Multifamily	18C346P069	18C346P069	18C346P069_1	4	4
Multifamily	18C346P071	18C346P071	18C346P071	4	3.5
Multifamily	18C346P072	18C346P072	18C346P072	4	3.5
Multifamily	18C346P011	18C346P011	18C346P011	4	3.5
Multifamily	18C347P070	18C347P070	18C347P070_3	4	2.5
Multifamily	18C347P059	18C347P059	18C347P059	4	2.5
Multifamily	18C347P049	18C347P049	18C347P049_1	4	3
Multifamily	18C342P056	18C342P056	18C342P056	4	2.5
Multifamily	18C342P059	18C342P059	18C342P059_1	4	2.5
Multifamily	18C342P058	18C342P058	18C342P058	4	2.5
Multifamily	18C342P100	18C342P100	18C342P100_1	4	4
Multifamily	08C123P001	UCD_Royal_Royce	08C123P001_2	4	3
Multifamily	18C343P011	18C343P011	18C343P011_1	4	3.5
Multifamily	18C342P082	18C342P082	18C342P082_1	4	3.5
Multifamily	18C342P018	18C342P018	18C342P018	4	2.5
Multifamily	18C342P011	18C342P011	18C342P011	4	3
Multifamily	18C343P096	18C343P096	18C343P096	4	3
Multifamily	18C343P066	18C343P066	18C343P066_2	4	3.5
Multifamily	18C343P065	18C343P065	18C343P065_2	4	3
Multifamily	18C343P071	18C343P071	18C343P071_1	4	2.5
Multifamily	18C343P071	18C343P071	18C343P071_2	4	3
Multifamily	18C343P056	18C343P056	18C343P056_4	4	2.5
Multifamily	18C343P056	18C343P056	18C343P056_5	4	4
Multifamily	18C343P057	18C343P057	18C343P057_2	4	4.5
Multifamily	18C347P029	18C347P029	18C347P029_1	4	3
Multifamily	18C347P023	18C347P023	18C347P023	4	3
Multifamily	18C347P022	18C347P022	18C347P022_1	4	3
Multifamily	18C347P022	18C347P022	18C347P022_2	4	3
Multifamily	18C347P016	18C347P016	18C347P016	4	2.5
Multifamily	18C347P015	18C347P015	18C347P015_1	4	3
Multifamily	18C346P069	18C346P069	18C346P069_2	4	3
Multifamily	18C346P075	18C346P075	18C346P075_1	4	2.5
Multifamily	18C346P004	18C346P004	18C346P004_3	4	2.5
Multifamily	18C346P016	18C346P016	18C346P016_3	4	2.5
Multifamily	18B168P087	18B168P087	18B168P087	4	2.5
Multifamily	18B168P087	18B168P087	18B168P087_1	4	2.5
Multifamily	18B168P074	18B168P074	18B168P074	4	2
Multifamily	18C347P072	18C347P072	18C347P072_1	4	3
Multifamily	18C347P056	18C347P056	18C347P056	4	2
Multifamily	18C347P053	18C347P053	18C347P053	4	3
Multifamily	05C197P002	05C197P002	05C197P002_2	4	2
Multifamily	18C343P077	18C343P077	18C343P077	4	3.5
Multifamily	18C347P082	18C347P082	18C347P082_1	4	2.5
Multifamily	18C347P086	18C347P086	18C347P086	4	3
Multifamily	18C342P037	18C342P037	18C342P037	4	4
Multifamily	18C342P034	18C342P034	18C342P034	4	2.5
Multifamily	18C342P035	18C342P035	18C342P035	4	2.5
Multifamily	18C346P025	18C346P025	18C346P025_2	4	2
Multifamily	18C346P032	18C346P032	18C346P032_4	4	3.5
Multifamily	18C346P026	18C346P026	18C346P026_5	4	3.5
Multifamily	18C343P046	18C343P046	18C343P046	4	2
Multifamily	18C346P047	18C346P047	18C346P047	4	3.5
Multifamily	18C346P049	18C346P049	18C346P049_1	4	2.5
Multifamily	18C343P043	18C343P043	18C343P043_2	4	2.5
Multifamily	18C346P040	18C346P040	18C346P040_4	4	2.5
Multifamily	18C347P010	18C347P010	18C347P010	4	3.5
Multifamily	18C342P080	18C342P080	18C342P080_1	4	2.5
Multifamily	18C343P095	18C343P095	18C343P095	4	4
Multifamily	18C343P032	18C343P032	18C343P032_1	4	2
Multifamily	18C343P021	18C343P021	18C343P021_1	4	2.5
Multifamily	18C343P068	18C343P068	18C343P068	4	3.5
Multifamily	18C343P067	18C343P067	18C343P067_5	4	3.5
Multifamily	18C343P070	18C343P070	18C343P070_1	4	3
Multifamily	18C343P070	18C343P070	18C343P070_2	4	4.5
Multifamily	18C343P062	18C343P062	18C343P062	4	5
Multifamily	18C343P061	18C343P061	18C343P061_2	4	3.5
Multifamily	18C343P056	18C343P056	18C343P056_6	4	3.5
Multifamily	18C343P060	18C343P060	18C343P060	4	3
Multifamily	18C347P042	18C347P042	18C347P042_4	4	3
Multifamily	18C347P030	18C347P030	18C347P030	4	4
Multifamily	18B168P011	18B168P011	18B168P011_1	4	2.5
Multifamily	18C346P060	18C346P060	18C346P060	4	3
Multifamily	18C346P069	18C346P069	18C346P069_3	4	3.5
Multifamily	18C346P070	18C346P070	18C346P070_2	4	3
Multifamily	18C346P068	18C346P068	18C346P068_4	4	2
Multifamily	18C346P068	18C346P068	18C346P068_5	4	3.5
Multifamily	18C346P077	18C346P077	18C346P077_3	4	3.5
Multifamily	18C346P072	18C346P072	18C346P072_1	4	3.5
Multifamily	18C346P005	18C346P005	18C346P005_2	4	4
Multifamily	18C346P004	18C346P004	18C346P004_4	4	2.5
Multifamily	18C346P086	18C346P086	18C346P086_3	4	6.5
Multifamily	18C347P065	18C347P065	18C347P065_1	4	2.5
Multifamily	18C347P068	18C347P068	18C347P068_1	4	5
Multifamily	18C347P070	18C347P070	18C347P070_4	4	3
Multifamily	18C347P059	18C347P059	18C347P059_1	4	3.5
Multifamily	18C347P057	18C347P057	18C347P057_1	4	2.5
Multifamily	18B168P028	18B168P028	18B168P028	4	4
Multifamily	08C123P001	UCD_Royal_Royce	08C123P001_3	4	2.5
Multifamily	18C343P081	18C343P081	18C343P081_1	4	4
Multifamily	18C342P046	18C342P046	18C342P046	4	3
Multifamily	18C342P040	18C342P040	18C342P040_1	4	5
Multifamily	18C343P015	18C343P015	18C343P015_3	4	2.5
Multifamily	18C342P086	18C342P086	18C342P086	4	4
Multifamily	18C342P088	18C342P088	18C342P088	4	3.5
Multifamily	18C342P091	18C342P091	18C342P091_1	4	3
Multifamily	18C343P039	18C343P039	18C343P039	4	2.5
Multifamily	18C343P044	18C343P044	18C343P044_1	4	2.5
Multifamily	18C346P039	18C346P039	18C346P039_5	4	2.5
Multifamily	18C346P039	18C346P039	18C346P039_6	4	3
Multifamily	18C343P099	18C343P099	18C343P099_2	4	3.5
Multifamily	18C343P098	18C343P098	18C343P098_1	4	4
Multifamily	18C343P097	18C343P097	18C343P097_3	4	4
Multifamily	18C343P097	18C343P097	18C343P097_4	4	3
Multifamily	18B168P045	18B168P045	18B168P045	4	2
Multifamily	18C343P072	18C343P072	18C343P072_2	4	1.5
Multifamily	18C347P031	18C347P031	18C347P031	4	3
Multifamily	18C347P031	18C347P031	18C347P031_1	4	2.5
Multifamily	18C347P037	18C347P037	18C347P037	4	4
Multifamily	18C347P029	18C347P029	18C347P029_2	4	2
Multifamily	18C347P023	18C347P023	18C347P023_1	4	3
Multifamily	18C347P021	18C347P021	18C347P021	4	2.5
Multifamily	18C346P086	18C346P086	18C346P086_4	4	3.5
Multifamily	18C346P081	18C346P081	18C346P081_1	4	4
Multifamily	18B168P076	18B168P076	18B168P076_1	4	2
Multifamily	18C347P075	18C347P075	18C347P075_1	4	3
Multifamily	18B168P061	18B168P061	18B168P061	4	3
Multifamily	08C123P001	UCD_Royal_Royce	08C123P001_4	4	3
Multifamily	18C343P079	18C343P079	18C343P079_1	4	3
Multifamily	18C342P038	18C342P038	18C342P038_1	4	2.5
Multifamily	18C343P018	18C343P018	18C343P018	4	2.5
Multifamily	18C343P016	18C343P016	18C343P016_1	4	3
Multifamily	18C342P027	18C342P027	18C342P027	4	4
Multifamily	18C343P054	18C343P054	18C343P054_1	4	3.5
Multifamily	18C343P055	18C343P055	18C343P055	4	2
Multifamily	18C342P019	18C342P019	18C342P019_2	4	2.5
Multifamily	18C346P040	18C346P040	18C346P040_5	4	4
Multifamily	18C342P075	18C342P075	18C342P075_3	4	3.5
Multifamily	18C343P098	18C343P098	18C343P098_2	4	2.5
Multifamily	18B168P031	18B168P031	18B168P031_1	4	2
Multifamily	18C343P069	18C343P069	18C343P069_4	4	7.5
Multifamily	18C343P071	18C343P071	18C343P071_3	4	5
Multifamily	18C343P061	18C343P061	18C343P061_3	4	4.5
Multifamily	18C343P056	18C343P056	18C343P056_7	4	4.5
Multifamily	18C347P024	18C347P024	18C347P024_3	4	2
Multifamily	18C346P063	18C346P063	18C346P063	4	5
Multifamily	18C346P067	18C346P067	18C346P067_1	4	2
Multifamily	18C346P077	18C346P077	18C346P077_4	4	3
Multifamily	18C346P020	18C346P020	18C346P020	4	2.5
Multifamily	18C346P022	18C346P022	18C346P022_1	4	2.5
Multifamily	18C346P086	18C346P086	18C346P086_5	4	4.5
Multifamily	18B168P087	18B168P087	18B168P087_2	4	3
Multifamily	18C343P005	18C343P005	18C343P005_1	4	2.5
Multifamily	18C342P100	18C342P100	18C342P100_2	4	4
Multifamily	08C123P001	UCD_Royal_Royce	08C123P001_5	4	2.5
Multifamily	08C123P001	UCD_Royal_Royce	08C123P001_6	4	3.5
Multifamily	08C123P001	UCD_Royal_Royce	08C123P001_7	4	3
Multifamily	18C343P081	18C343P081	18C343P081_2	4	2.5
Multifamily	18C342P048	18C342P048	18C342P048	4	3
Multifamily	18C342P036	18C342P036	18C342P036	4	2.5
Multifamily	18C347P094	18C347P094	18C347P094	4	2.5
Multifamily	18C346P034	18C346P034	18C346P034_5	4	3.5
Multifamily	18C343P055	18C343P055	18C343P055_1	4	4.5
Multifamily	18C342P017	18C342P017	18C342P017	4	4
Multifamily	18C346P049	18C346P049	18C346P049_2	4	3.5
Multifamily	18C342P091	18C342P091	18C342P091_2	4	3
Multifamily	18C342P090	18C342P090	18C342P090_1	4	3
Multifamily	18C342P092	18C342P092	18C342P092	4	3
Multifamily	18C343P040	18C343P040	18C343P040_5	4	3.5
Multifamily	18C343P043	18C343P043	18C343P043_3	4	2
Multifamily	18C343P045	18C343P045	18C343P045	4	3
Multifamily	18B168P001	18B168P001	18B168P001_1	4	2
Multifamily	18C342P008	18C342P008	18C342P008_2	4	2.5
Multifamily	18C343P096	18C343P096	18C343P096_1	4	3
Multifamily	18C343P030	18C343P030	18C343P030_1	4	6
Multifamily	18C343P035	18C343P035	18C343P035	4	3
Multifamily	18C343P065	18C343P065	18C343P065_3	4	4.5
Multifamily	18C343P064	18C343P064	18C343P064	4	3
Multifamily	18C346P091	18C346P091	18C346P091	4	3
Multifamily	18C346P093	18C346P093	18C346P093_2	4	3
Multifamily	18C346P092	18C346P092	18C346P092_2	4	2.5
Multifamily	18C346P092	18C346P092	18C346P092_3	4	2.5
Multifamily	18C346P099	18C346P099	18C346P099_2	4	2.5
Multifamily	18C347P031	18C347P031	18C347P031_2	4	3
Multifamily	18C347P027	18C347P027	18C347P027_1	4	3.5
Multifamily	18C346P056	18C346P056	18C346P056_1	4	4
Multifamily	18C346P064	18C346P064	18C346P064_1	4	2
Multifamily	18C346P066	18C346P066	18C346P066_2	4	4.5
Multifamily	18C346P021	18C346P021	18C346P021_1	4	2.5
Multifamily	18C346P086	18C346P086	18C346P086_6	4	3
Multifamily	18C347P069	18C347P069	18C347P069_1	4	2.5
Multifamily	18C347P059	18C347P059	18C347P059_2	4	3
Multifamily	18C342P073	18C342P073	18C342P073_1	4	2.5
Multifamily	18B168P068	18B168P068	18B168P068	4	2
Multifamily	18B168P063	18B168P063	18B168P063	4	3
Multifamily	18B168P057	18B168P057	18B168P057	4	2
Multifamily	18B168P058	18B168P058	18B168P058	4	2
Multifamily	08C123P001	UCD_Royal_Royce	08C123P001	5	3
Multifamily	08C123P001	UCD_Royal_Royce	08C123P001_1	5	2
Multifamily	18C343P081	18C343P081	18C343P081_3	4	2.5
Multifamily	18C342P040	18C342P040	18C342P040_2	4	8.5
Multifamily	18C347P094	18C347P094	18C347P094_1	4	3.5
Multifamily	18C343P017	18C343P017	18C343P017	4	3.5
Multifamily	18C342P066	18C342P066	18C342P066_1	4	7
Multifamily	18C342P032	18C342P032	18C342P032_1	4	4
Multifamily	18C346P025	18C346P025	18C346P025_3	4	2.5
Multifamily	18C346P034	18C346P034	18C346P034_6	4	3
Multifamily	18C342P024	18C342P024	18C342P024_1	4	3
Multifamily	18C346P050	18C346P050	18C346P050_3	4	2.5
Multifamily	18B168P003	18B168P003	18B168P003	4	3
Multifamily	18C347P008	18C347P008	18C347P008	4	4.5
Multifamily	18C342P080	18C342P080	18C342P080_2	4	3.5
Multifamily	18C343P098	18C343P098	18C343P098_3	4	3.5
Multifamily	18B168P031	18B168P031	18B168P031_2	4	4
Multifamily	18C343P067	18C343P067	18C343P067_6	4	3
Multifamily	18C343P071	18C343P071	18C343P071_4	4	4.5
Multifamily	18C343P056	18C343P056	18C343P056_8	4	3
Multifamily	18C346P093	18C346P093	18C346P093_3	4	2.5
Multifamily	18C346P092	18C346P092	18C346P092_4	4	3.5
Multifamily	18C346P097	18C346P097	18C346P097_1	4	4
Multifamily	18C347P037	18C347P037	18C347P037_1	4	3
Multifamily	18C347P038	18C347P038	18C347P038	4	3.5
Multifamily	18C347P020	18C347P020	18C347P020	4	3
Multifamily	18C346P066	18C346P066	18C346P066_3	4	3
Multifamily	18C346P003	18C346P003	18C346P003_2	4	2.5
Multifamily	18C346P081	18C346P081	18C346P081_2	4	5
Multifamily	18C346P079	18C346P079	18C346P079_3	4	5
Multifamily	18B168P087	18B168P087	18B168P087_3	4	2.5
Multifamily	18B168P074	18B168P074	18B168P074_1	4	2.5
Multifamily	18C347P074	18C347P074	18C347P074	4	3.5
Multifamily	18C347P067	18C347P067	18C347P067	4	3
Multifamily	18C347P070	18C347P070	18C347P070_5	4	3
Multifamily	18C347P058	18C347P058	18C347P058_4	4	4
Multifamily	18C347P059	18C347P059	18C347P059_3	4	3.5
Multifamily	18C347P051	18C347P051	18C347P051	4	3
Multifamily	18C342P052	18C342P052	18C342P052	4	3
Multifamily	18C343P004	18C343P004	18C343P004_1	4	3
Multifamily	05C197P002	05C197P002	05C197P002_3	4	2.5
Multifamily	18C343P080	18C343P080	18C343P080_2	4	3
Multifamily	18C347P099	18C347P099	18C347P099	4	4.5
Multifamily	18C347P079	18C347P079	18C347P079	4	4
Multifamily	18C347P087	18C347P087	18C347P087_1	4	2.5
Multifamily	18C347P096	18C347P096	18C347P096_1	4	3
Multifamily	18C343P011	18C343P011	18C343P011_2	4	5
Multifamily	18C346P050	18C346P050	18C346P050_4	4	3.5
Multifamily	18C342P009	18C342P009	18C342P009_1	4	2.5
Multifamily	18C346P043	18C346P043	18C346P043_1	4	6
Multifamily	18C346P038	18C346P038	18C346P038_3	4	2.5
Multifamily	18C347P002	18C347P002	18C347P002	4	4
Multifamily	18C342P083	18C342P083	18C342P083	4	3.5
Multifamily	18C343P021	18C343P021	18C343P021_2	4	3.5
Multifamily	18C343P027	18C343P027	18C343P027	4	3
Multifamily	18C343P026	18C343P026	18C343P026_2	4	3
Multifamily	18B168P031	18B168P031	18B168P031_3	4	2.5
Multifamily	18C343P065	18C343P065	18C343P065_4	4	3
Multifamily	18C343P070	18C343P070	18C343P070_3	4	3.5
Multifamily	18C343P070	18C343P070	18C343P070_4	4	3
Multifamily	18C347P035	18C347P035	18C347P035	4	3.5
Multifamily	18C347P031	18C347P031	18C347P031_3	4	3
Multifamily	18C347P029	18C347P029	18C347P029_3	4	3.5
Multifamily	18C347P020	18C347P020	18C347P020_1	4	3
Multifamily	18C346P079	18C346P079	18C346P079_4	4	3
Multifamily	18B168P074	18B168P074	18B168P074_2	4	2
Multifamily	18C347P077	18C347P077	18C347P077	4	2.5
Multifamily	18C347P055	18C347P055	18C347P055	4	2.5
Multifamily	18C347P056	18C347P056	18C347P056_1	4	3
Multifamily	18C347P047	18C347P047	18C347P047_1	4	3
Multifamily	18B168P024	18B168P024	18B168P024	4	2.5
Multifamily	08C123P001	UCD_Royal_Royce	08C123P001_2	5	3
Multifamily	08C123P001	UCD_Royal_Royce	08C123P001_3	5	2.5
Multifamily	08C123P001	UCD_Royal_Royce	08C123P001_4	5	3
Multifamily	18C343P086	18C343P086	18C343P086	4	3
Multifamily	18C342P049	18C342P049	18C342P049	4	3
Multifamily	18C343P018	18C343P018	18C343P018_1	4	2.5
Multifamily	18C343P018	18C343P018	18C343P018_2	4	2.5
Multifamily	18C342P029	18C342P029	18C342P029	4	5
Multifamily	18C346P026	18C346P026	18C346P026_6	4	2
Multifamily	18C343P046	18C343P046	18C343P046_1	4	2
Multifamily	18C343P054	18C343P054	18C343P054_2	4	2.5
Multifamily	18C343P055	18C343P055	18C343P055_2	4	2.5
Multifamily	18C342P021	18C342P021	18C342P021	4	3
Multifamily	18C346P049	18C346P049	18C346P049_3	4	3.5
Multifamily	18C342P088	18C342P088	18C342P088_1	4	2.5
Multifamily	18C343P044	18C343P044	18C343P044_2	4	2.5
Multifamily	18B168P007	18B168P007	18B168P007	4	3
Multifamily	18C342P005	18C342P005	18C342P005	4	3
Multifamily	18C343P098	18C343P098	18C343P098_4	4	6
Multifamily	18C343P097	18C343P097	18C343P097_5	4	2
Multifamily	18B168P049	18B168P049	18B168P049	4	3
Multifamily	18B168P038	18B168P038	18B168P038	4	2
Multifamily	18C343P067	18C343P067	18C343P067_7	4	2.5
Multifamily	18C343P064	18C343P064	18C343P064_1	4	2.5
Multifamily	18C343P060	18C343P060	18C343P060_1	4	3
Multifamily	18C347P041	18C347P041	18C347P041_1	4	3.5
Multifamily	18C347P036	18C347P036	18C347P036_2	4	3
Multifamily	18C347P037	18C347P037	18C347P037_2	4	4
Multifamily	18C347P029	18C347P029	18C347P029_4	4	2.5
Multifamily	18C347P021	18C347P021	18C347P021_1	4	2
Multifamily	18C346P058	18C346P058	18C346P058	4	2.5
Multifamily	18C346P069	18C346P069	18C346P069_4	4	6
Multifamily	18C346P016	18C346P016	18C346P016_4	4	3
Multifamily	18C346P024	18C346P024	18C346P024_4	4	2.5
Multifamily	18C346P023	18C346P023	18C346P023_1	4	4
Multifamily	18C346P082	18C346P082	18C346P082_1	4	3
Multifamily	18B168P096	18B168P096	18B168P096	4	3
Multifamily	18B168P098	18B168P098	18B168P098	4	2.5
Multifamily	18C347P063	18C347P063	18C347P063_1	4	6.5
Multifamily	18C347P048	18C347P048	18C347P048_4	4	4
Multifamily	18C347P046	18C347P046	18C347P046_1	4	2.5
Multifamily	18C343P009	18C343P009	18C343P009_2	4	2.5
Multifamily	18C342P095	18C342P095	18C342P095	4	3.5
Multifamily	18C347P091	18C347P091	18C347P091_2	4	3.5
Multifamily	18C347P081	18C347P081	18C347P081	4	3
Multifamily	18C343P018	18C343P018	18C343P018_3	4	3.5
Multifamily	18C346P034	18C346P034	18C346P034_7	4	4
Multifamily	18C346P029	18C346P029	18C346P029_2	4	2
Multifamily	18C343P052	18C343P052	18C343P052_2	4	3
Multifamily	18C346P049	18C346P049	18C346P049_4	4	4
Multifamily	18C342P089	18C342P089	18C342P089_4	4	2.5
Multifamily	18C343P043	18C343P043	18C343P043_4	4	2
Multifamily	18C347P011	18C347P011	18C347P011_1	4	3.5
Multifamily	18C342P005	18C342P005	18C342P005_1	4	2.5
Multifamily	18C342P075	18C342P075	18C342P075_4	4	3
Multifamily	18C343P025	18C343P025	18C343P025_3	4	3
Multifamily	18B168P045	18B168P045	18B168P045_1	4	3
Multifamily	18C343P060	18C343P060	18C343P060_2	4	3.5
Multifamily	18C346P093	18C346P093	18C346P093_4	4	2.5
Multifamily	18C346P096	18C346P096	18C346P096	4	3.5
Multifamily	18C347P042	18C347P042	18C347P042_5	4	4
Multifamily	18C346P069	18C346P069	18C346P069_5	4	4
Multifamily	18C346P083	18C346P083	18C346P083	4	4.5
Multifamily	18C346P082	18C346P082	18C346P082_2	4	3
Multifamily	18C347P080	18C347P080	18C347P080_1	4	2.5
Multifamily	18C347P065	18C347P065	18C347P065_2	4	3.5
Multifamily	18C347P057	18C347P057	18C347P057_2	4	3.5
Multifamily	18C342P070	18C342P070	18C342P070_4	4	2
Multifamily	18C343P010	18C343P010	18C343P010	4	3.5
Multifamily	18C342P100	18C342P100	18C342P100_3	4	3
Multifamily	08C123P001	UCD_Royal_Royce	08C123P001_5	5	2.5
Multifamily	18C343P086	18C343P086	18C343P086_1	4	6.5
Multifamily	18C343P092	18C343P092	18C343P092	4	3.5
Multifamily	18C343P080	18C343P080	18C343P080_3	4	3.5
Multifamily	18C347P093	18C347P093	18C347P093	4	2.5
Multifamily	18C342P043	18C342P043	18C342P043	4	2
Multifamily	18C342P065	18C342P065	18C342P065_1	4	5
Multifamily	18C347P096	18C347P096	18C347P096_2	4	7
Multifamily	18C343P014	18C343P014	18C343P014	4	4
Multifamily	18C342P029	18C342P029	18C342P029_1	4	6.5
Multifamily	18C342P029	18C342P029	18C342P029_2	4	5.5
Multifamily	18C346P025	18C346P025	18C346P025_4	4	2.5
Multifamily	18C343P053	18C343P053	18C343P053_2	4	4
Multifamily	18C343P054	18C343P054	18C343P054_3	4	3
Multifamily	18C343P039	18C343P039	18C343P039_1	4	2.5
Multifamily	18C343P044	18C343P044	18C343P044_3	4	3.5
Multifamily	18C343P045	18C343P045	18C343P045_1	4	4
Multifamily	18C346P043	18C346P043	18C346P043_2	4	3.5
Multifamily	18C347P002	18C347P002	18C347P002_1	4	4
Multifamily	18C347P005	18C347P005	18C347P005	4	2.5
Multifamily	18C342P002	18C342P002	18C342P002_1	4	2.5
Multifamily	18C343P035	18C343P035	18C343P035_1	4	3.5
Multifamily	18B168P045	18B168P045	18B168P045_2	4	4
Multifamily	18B168P035	18B168P035	18B168P035	4	3
Multifamily	18B168P031	18B168P031	18B168P031_4	4	3
Multifamily	18C343P071	18C343P071	18C343P071_5	4	7
Multifamily	18C346P091	18C346P091	18C346P091_1	4	3.5
Multifamily	18C347P035	18C347P035	18C347P035_1	4	4
Multifamily	18C347P031	18C347P031	18C347P031_4	4	2.5
Multifamily	18C347P029	18C347P029	18C347P029_5	4	2.5
Multifamily	18C347P014	18C347P014	18C347P014	4	3
Multifamily	18B168P017	18B168P017	18B168P017_1	4	2
Multifamily	18C346P061	18C346P061	18C346P061	4	4
Multifamily	18C346P071	18C346P071	18C346P071_1	4	2
Multifamily	18C346P078	18C346P078	18C346P078	4	4.5
Multifamily	18C346P009	18C346P009	18C346P009	4	2.5
Multifamily	18C346P023	18C346P023	18C346P023_2	4	2.5
Multifamily	18C346P079	18C346P079	18C346P079_5	4	3.5
Multifamily	18C346P082	18C346P082	18C346P082_3	4	6
Multifamily	18B168P084	18B168P084	18B168P084	4	2.5
Multifamily	18C347P077	18C347P077	18C347P077_1	4	3
Multifamily	18C347P075	18C347P075	18C347P075_2	4	2.5
Multifamily	18C347P065	18C347P065	18C347P065_3	4	2.5
Multifamily	18C347P068	18C347P068	18C347P068_2	4	4.5
Multifamily	18C347P061	18C347P061	18C347P061	4	2.5
Multifamily	18C347P056	18C347P056	18C347P056_2	4	4
Multifamily	18C347P057	18C347P057	18C347P057_3	4	3
Multifamily	18C347P053	18C347P053	18C347P053_1	4	3.5
Multifamily	18C347P046	18C347P046	18C347P046_2	4	2.5
Multifamily	18C342P096	18C342P096	18C342P096	4	4
Multifamily	18B168P064	18B168P064	18B168P064	4	2.5
Multifamily	05C197P002	05C197P002	05C197P002_4	4	2.5
Multifamily	18C343P075	18C343P075	18C343P075	4	3
Multifamily	18C347P084	18C347P084	18C347P084	4	3.5
Multifamily	18C347P086	18C347P086	18C347P086_1	4	3
Multifamily	18C342P049	18C342P049	18C342P049_1	4	5
Multifamily	18C343P018	18C343P018	18C343P018_4	4	6
Multifamily	18C346P028	18C346P028	18C346P028	4	3
Multifamily	18C343P054	18C343P054	18C343P054_4	4	2.5
Multifamily	18C342P024	18C342P024	18C342P024_2	4	3.5
Multifamily	18C346P047	18C346P047	18C346P047_1	4	2.5
Multifamily	18C343P042	18C343P042	18C343P042_1	4	2
Multifamily	18C343P045	18C343P045	18C343P045_2	4	2.5
Multifamily	18C342P003	18C342P003	18C342P003_1	4	2.5
Multifamily	18C343P029	18C343P029	18C343P029_1	4	3
Multifamily	18C343P056	18C343P056	18C343P056_9	4	3.5
Multifamily	18C346P095	18C346P095	18C346P095	4	3.5
Multifamily	18C346P097	18C346P097	18C346P097_2	4	4.5
Multifamily	18C347P040	18C347P040	18C347P040_1	4	3.5
Multifamily	18C347P041	18C347P041	18C347P041_2	4	3
Multifamily	18C347P027	18C347P027	18C347P027_2	4	2
Multifamily	18C346P071	18C346P071	18C346P071_2	4	2
Multifamily	18C346P071	18C346P071	18C346P071_3	4	2.5
Multifamily	18C346P082	18C346P082	18C346P082_4	4	2.5
Multifamily	18B168P086	18B168P086	18B168P086	4	2.5
Multifamily	18C347P074	18C347P074	18C347P074_1	4	2.5
Multifamily	18C347P068	18C347P068	18C347P068_3	4	4
Multifamily	18C342P069	18C342P069	18C342P069	4	2.5
Multifamily	18C343P083	18C343P083	18C343P083	4	2.5
Multifamily	18C347P089	18C347P089	18C347P089	4	3
Multifamily	18C347P081	18C347P081	18C347P081_1	4	3
Multifamily	18C342P064	18C342P064	18C342P064	4	2
Multifamily	18C347P094	18C347P094	18C347P094_2	4	2
Multifamily	18C343P011	18C343P011	18C343P011_3	4	3.5
Multifamily	18C342P066	18C342P066	18C342P066_2	4	3.5
Multifamily	18C346P034	18C346P034	18C346P034_8	4	3
Multifamily	18C343P049	18C343P049	18C343P049	4	5
Multifamily	18C343P055	18C343P055	18C343P055_3	4	2
Multifamily	18C342P085	18C342P085	18C342P085	4	4
Multifamily	18C342P089	18C342P089	18C342P089_5	4	8.5
Multifamily	18B168P005	18B168P005	18B168P005	4	1.5
Multifamily	18B168P005	18B168P005	18B168P005_1	4	3
Multifamily	18C347P011	18C347P011	18C347P011_2	4	3.5
Multifamily	18C347P005	18C347P005	18C347P005_1	4	2
Multifamily	18C343P033	18C343P033	18C343P033_2	4	2.5
Multifamily	18C346P093	18C346P093	18C346P093_5	4	2.5
Multifamily	18C347P040	18C347P040	18C347P040_2	4	3
Multifamily	18C347P030	18C347P030	18C347P030_1	4	4
Multifamily	18C347P030	18C347P030	18C347P030_2	4	5
Multifamily	18C347P037	18C347P037	18C347P037_3	4	5
Multifamily	18C347P024	18C347P024	18C347P024_4	4	2.5
Multifamily	18C346P067	18C346P067	18C346P067_2	4	3.5
Multifamily	18C346P076	18C346P076	18C346P076	4	2
Multifamily	18C346P073	18C346P073	18C346P073	4	4.5
Multifamily	18C346P072	18C346P072	18C346P072_2	4	4
Multifamily	18C346P072	18C346P072	18C346P072_3	4	4
Multifamily	18C346P074	18C346P074	18C346P074_1	4	6
Multifamily	18C346P009	18C346P009	18C346P009_1	4	2
Multifamily	18C346P082	18C346P082	18C346P082_5	4	3
Multifamily	18B168P099	18B168P099	18B168P099	4	2
Multifamily	18C347P080	18C347P080	18C347P080_2	4	3
Multifamily	18C347P058	18C347P058	18C347P058_5	4	3.5
Multifamily	18C342P055	18C342P055	18C342P055	4	2.5
Multifamily	18C342P072	18C342P072	18C342P072	4	4.5
Multifamily	18C343P008	18C343P008	18C343P008_1	4	3
Multifamily	08C123P001	UCD_Royal_Royce	08C123P001_6	5	6
Multifamily	18C343P077	18C343P077	18C343P077_1	4	4.5
Multifamily	18C343P080	18C343P080	18C343P080_4	4	3
Multifamily	18C347P093	18C347P093	18C347P093_1	4	3
Multifamily	18C347P085	18C347P085	18C347P085	4	2.5
Multifamily	18C343P011	18C343P011	18C343P011_4	4	6
Multifamily	18C342P066	18C342P066	18C342P066_3	4	3
Multifamily	18C343P054	18C343P054	18C343P054_5	4	2
Multifamily	18C346P044	18C346P044	18C346P044_1	4	2.5
Multifamily	18C346P043	18C346P043	18C346P043_3	4	3.5
Multifamily	18B168P005	18B168P005	18B168P005_2	4	2.5
Multifamily	18C347P004	18C347P004	18C347P004	4	3
Multifamily	18C347P004	18C347P004	18C347P004_1	4	3
Multifamily	18C342P007	18C342P007	18C342P007_1	4	2.5
Multifamily	18C342P080	18C342P080	18C342P080_3	4	2.5
Multifamily	18C343P098	18C343P098	18C343P098_5	4	3
Multifamily	18C343P022	18C343P022	18C343P022_3	4	2.5
Multifamily	18B168P045	18B168P045	18B168P045_3	4	2
Multifamily	18B168P032	18B168P032	18B168P032	4	1.5
Multifamily	18B168P038	18B168P038	18B168P038_1	4	2.5
Multifamily	18C343P061	18C343P061	18C343P061_4	4	3.5
Multifamily	18C346P091	18C346P091	18C346P091_2	4	4.5
Multifamily	18C346P099	18C346P099	18C346P099_3	4	3.5
Multifamily	18C347P034	18C347P034	18C347P034	4	4.5
Multifamily	18C347P017	18C347P017	18C347P017	4	2.5
Multifamily	18C347P018	18C347P018	18C347P018_1	4	2.5
Multifamily	18C347P014	18C347P014	18C347P014_1	4	4.5
Multifamily	18C346P058	18C346P058	18C346P058_1	4	2.5
Multifamily	18C346P072	18C346P072	18C346P072_4	4	4.5
Multifamily	18C346P072	18C346P072	18C346P072_5	4	4
Multifamily	18C346P022	18C346P022	18C346P022_2	4	2.5
Multifamily	18C346P085	18C346P085	18C346P085	4	3
Multifamily	18C347P080	18C347P080	18C347P080_3	4	2.5
Multifamily	18C347P071	18C347P071	18C347P071	4	2.5
Multifamily	18C347P065	18C347P065	18C347P065_4	4	3
Multifamily	18C347P059	18C347P059	18C347P059_4	4	3.5
Multifamily	18C342P059	18C342P059	18C342P059_2	4	2.5
Multifamily	18B168P062	18B168P062	18B168P062	4	2
Multifamily	18B168P051	18B168P051	18B168P051	4	2.5
Multifamily	08C123P001	UCD_Royal_Royce	08C123P001_7	5	3
Multifamily	18C343P088	18C343P088	18C343P088_1	4	3
Multifamily	18C343P085	18C343P085	18C343P085	4	3.5
Multifamily	18C343P080	18C343P080	18C343P080_5	4	5
Multifamily	18C343P083	18C343P083	18C343P083_1	4	3.5
Multifamily	18C347P093	18C347P093	18C347P093_2	4	2
Multifamily	18C347P082	18C347P082	18C347P082_2	4	4.5
Multifamily	18C347P086	18C347P086	18C347P086_2	4	2.5
Multifamily	18C342P044	18C342P044	18C342P044	4	3.5
Multifamily	18C342P042	18C342P042	18C342P042	4	2
Multifamily	18C342P063	18C342P063	18C342P063	4	2.5
Multifamily	18C346P044	18C346P044	18C346P044_2	4	2.5
Multifamily	18C346P048	18C346P048	18C346P048	4	4
Multifamily	18C343P045	18C343P045	18C343P045_3	4	4
Multifamily	18C347P010	18C347P010	18C347P010_1	4	3.5
Multifamily	18C342P083	18C342P083	18C342P083_1	4	3.5
Multifamily	18C343P096	18C343P096	18C343P096_2	4	3
Multifamily	18C343P096	18C343P096	18C343P096_3	4	3
Multifamily	18C343P097	18C343P097	18C343P097_6	4	3
Multifamily	18C343P097	18C343P097	18C343P097_7	4	7.5
Multifamily	18C343P034	18C343P034	18C343P034_1	4	3
Multifamily	18C343P020	18C343P020	18C343P020	4	4
Multifamily	18C343P021	18C343P021	18C343P021_3	4	2
Multifamily	18C343P027	18C343P027	18C343P027_1	4	5
Multifamily	18B168P040	18B168P040	18B168P040	4	2.5
Multifamily	18C343P070	18C343P070	18C343P070_5	4	3.5
Multifamily	18C343P064	18C343P064	18C343P064_2	4	3
Multifamily	18C346P099	18C346P099	18C346P099_4	4	3.5
Multifamily	18C346P097	18C346P097	18C346P097_3	4	4.5
Multifamily	18C347P026	18C347P026	18C347P026	4	3.5
Multifamily	18C347P031	18C347P031	18C347P031_5	4	3
Multifamily	18C347P023	18C347P023	18C347P023_2	4	2
Multifamily	18C347P023	18C347P023	18C347P023_3	4	3
Multifamily	18C346P056	18C346P056	18C346P056_2	4	4
Multifamily	18C346P078	18C346P078	18C346P078_1	4	5
Multifamily	18C346P073	18C346P073	18C346P073_1	4	3
Multifamily	18B168P098	18B168P098	18B168P098_1	4	3
Multifamily	18C347P075	18C347P075	18C347P075_3	4	2.5
Multifamily	18C347P062	18C347P062	18C347P062	4	2.5
Multifamily	18C342P059	18C342P059	18C342P059_3	4	2.5
Multifamily	18C343P004	18C343P004	18C343P004_2	4	3
Multifamily	18C342P095	18C342P095	18C342P095_1	4	3
Multifamily	18C342P099	18C342P099	18C342P099_1	4	4
Multifamily	18B168P023	18B168P023	18B168P023_1	4	2.5
Multifamily	18C343P086	18C343P086	18C343P086_2	4	5.5
Multifamily	18C343P079	18C343P079	18C343P079_2	4	4
Multifamily	18C343P079	18C343P079	18C343P079_3	4	4
Multifamily	18C343P083	18C343P083	18C343P083_2	4	4.5
Multifamily	18C347P082	18C347P082	18C347P082_3	4	2.5
Multifamily	18C347P085	18C347P085	18C347P085_1	4	3
Multifamily	18C342P050	18C342P050	18C342P050_1	4	3
Multifamily	18C347P095	18C347P095	18C347P095_1	4	2.5
Multifamily	18C346P030	18C346P030	18C346P030	4	3
Multifamily	18C343P054	18C343P054	18C343P054_6	4	3
Multifamily	18C346P052	18C346P052	18C346P052	4	2
Multifamily	18C342P092	18C342P092	18C342P092_1	4	2.5
Multifamily	18C342P077	18C342P077	18C342P077_2	4	4
Multifamily	18C343P095	18C343P095	18C343P095_1	4	4
Multifamily	18C343P097	18C343P097	18C343P097_8	4	4
Multifamily	18C343P062	18C343P062	18C343P062_1	4	3.5
Multifamily	18C343P061	18C343P061	18C343P061_5	4	4.5
Multifamily	18C343P057	18C343P057	18C343P057_3	4	3.5
Multifamily	18C347P037	18C347P037	18C347P037_4	4	3.5
Multifamily	18C346P058	18C346P058	18C346P058_2	4	3.5
Multifamily	18C346P083	18C346P083	18C346P083_1	4	3
Multifamily	18C347P051	18C347P051	18C347P051_1	4	3
Multifamily	18C347P046	18C347P046	18C347P046_3	4	3
Multifamily	18C347P046	18C347P046	18C347P046_4	4	2.5
Multifamily	18B168P021	18B168P021	18B168P021	4	2.5
Multifamily	18B168P052	18B168P052	18B168P052	4	2.5
Multifamily	18C343P077	18C343P077	18C343P077_2	4	2.5
Multifamily	18C347P090	18C347P090	18C347P090	4	3
Multifamily	18C347P084	18C347P084	18C347P084_1	4	3.5
Multifamily	18C347P085	18C347P085	18C347P085_2	4	3.5
Multifamily	18C342P048	18C342P048	18C342P048_1	4	4
Multifamily	18C342P045	18C342P045	18C342P045	4	5
Multifamily	18C343P016	18C343P016	18C343P016_2	4	6.5
Multifamily	18C342P091	18C342P091	18C342P091_3	4	3
Multifamily	18C342P016	18C342P016	18C342P016	4	3.5
Multifamily	18C347P007	18C347P007	18C347P007_1	4	3
Multifamily	18C347P011	18C347P011	18C347P011_3	4	3.5
Multifamily	18C342P008	18C342P008	18C342P008_3	4	3.5
Multifamily	18C343P029	18C343P029	18C343P029_2	4	2.5
Multifamily	18B168P041	18B168P041	18B168P041_1	4	3
Multifamily	18C347P034	18C347P034	18C347P034_1	4	5
Multifamily	18C347P023	18C347P023	18C347P023_4	4	2.5
Multifamily	18C347P023	18C347P023	18C347P023_5	4	3.5
Multifamily	18C347P020	18C347P020	18C347P020_2	4	3
Multifamily	18C346P024	18C346P024	18C346P024_5	4	3
Multifamily	18C346P089	18C346P089	18C346P089_1	4	5
Multifamily	18C346P083	18C346P083	18C346P083_2	4	2.5
Multifamily	18C347P072	18C347P072	18C347P072_2	4	5
Multifamily	18C347P069	18C347P069	18C347P069_2	4	3
Multifamily	18C347P065	18C347P065	18C347P065_5	4	2.5
Multifamily	18C343P005	18C343P005	18C343P005_2	4	3
Multifamily	08C123P001	UCD_Royal_Royce	08C123P001	6	3
Multifamily	18C343P092	18C343P092	18C343P092_1	4	3
Multifamily	18C347P083	18C347P083	18C347P083	4	4
Multifamily	18C343P016	18C343P016	18C343P016_3	4	4.5
Multifamily	18C346P034	18C346P034	18C346P034_9	4	4
Multifamily	18C343P051	18C343P051	18C343P051	4	3.5
Multifamily	18C342P018	18C342P018	18C342P018_1	4	3
Multifamily	18C342P026	18C342P026	18C342P026	4	4
Multifamily	18C346P050	18C346P050	18C346P050_5	4	3
Multifamily	18C346P037	18C346P037	18C346P037_2	4	3
Multifamily	18C346P037	18C346P037	18C346P037_3	4	3
Multifamily	18C347P010	18C347P010	18C347P010_2	4	3
Multifamily	18C347P006	18C347P006	18C347P006	4	2.5
Multifamily	18C342P008	18C342P008	18C342P008_4	4	3
Multifamily	18C342P077	18C342P077	18C342P077_3	4	3.5
Multifamily	18C343P029	18C343P029	18C343P029_3	4	3
Multifamily	18C343P020	18C343P020	18C343P020_1	4	3
Multifamily	18B168P044	18B168P044	18B168P044	4	4
Multifamily	18B168P032	18B168P032	18B168P032_1	4	2
Multifamily	18C343P062	18C343P062	18C343P062_2	4	3
Multifamily	18C346P098	18C346P098	18C346P098	4	3.5
Multifamily	18C347P026	18C347P026	18C347P026_1	4	5.5
Multifamily	18C347P030	18C347P030	18C347P030_3	4	3.5
Multifamily	18C347P030	18C347P030	18C347P030_4	4	3.5
Multifamily	18C347P036	18C347P036	18C347P036_3	4	3.5
Multifamily	18C347P023	18C347P023	18C347P023_6	4	2.5
Multifamily	18C347P020	18C347P020	18C347P020_3	4	3.5
Multifamily	18C347P018	18C347P018	18C347P018_2	4	2.5
Multifamily	18C347P016	18C347P016	18C347P016_1	4	2.5
Multifamily	18C346P054	18C346P054	18C346P054	4	4.5
Multifamily	18C346P061	18C346P061	18C346P061_1	4	4
Multifamily	18C346P063	18C346P063	18C346P063_1	4	3
Multifamily	18C346P073	18C346P073	18C346P073_2	4	4
Multifamily	18B168P070	18B168P070	18B168P070_1	4	2.5
Multifamily	18C347P071	18C347P071	18C347P071_1	4	2.5
Multifamily	18C347P062	18C347P062	18C347P062_1	4	3
Multifamily	18C342P058	18C342P058	18C342P058_1	4	3.5
Multifamily	18C342P070	18C342P070	18C342P070_5	4	3
Multifamily	18B168P028	18B168P028	18B168P028_1	4	2.5
Multifamily	18B168P066	18B168P066	18B168P066_1	4	1.5
Multifamily	08C123P001	UCD_Royal_Royce	08C123P001_1	6	4
Multifamily	16C108P065	16C108P065	16C108P065	4	2.5
Multifamily	18C347P092	18C347P092	18C347P092	4	2
Multifamily	18C347P085	18C347P085	18C347P085_3	4	3
Multifamily	18C347P085	18C347P085	18C347P085_4	4	3.5
Multifamily	18C347P087	18C347P087	18C347P087_2	4	4
Multifamily	18C342P049	18C342P049	18C342P049_2	4	3
Multifamily	18C342P047	18C342P047	18C342P047_1	4	5
Multifamily	18C342P051	18C342P051	18C342P051	4	6.5
Multifamily	18C342P041	18C342P041	18C342P041_1	4	3.5
Multifamily	18C347P096	18C347P096	18C347P096_3	4	4
Multifamily	18C347P096	18C347P096	18C347P096_4	4	4.5
Multifamily	18C347P095	18C347P095	18C347P095_2	4	4
Multifamily	18C342P028	18C342P028	18C342P028_1	4	5
Multifamily	18C346P029	18C346P029	18C346P029_3	4	3
Multifamily	18C346P048	18C346P048	18C346P048_1	4	3.5
Multifamily	18C342P091	18C342P091	18C342P091_4	4	4.5
Multifamily	18C342P084	18C342P084	18C342P084	4	5
Multifamily	18C343P045	18C343P045	18C343P045_4	4	4
Multifamily	18C347P010	18C347P010	18C347P010_3	4	3
Multifamily	18C347P006	18C347P006	18C347P006_1	4	4.5
Multifamily	18C342P002	18C342P002	18C342P002_2	4	2
Multifamily	18C343P093	18C343P093	18C343P093	4	4.5
Multifamily	18B168P045	18B168P045	18B168P045_4	4	2.5
Multifamily	18B168P032	18B168P032	18B168P032_2	4	2.5
Multifamily	18B168P036	18B168P036	18B168P036_1	4	3
Multifamily	18C343P062	18C343P062	18C343P062_3	4	7
Multifamily	18C343P063	18C343P063	18C343P063	4	2
Multifamily	18C346P097	18C346P097	18C346P097_4	4	4.5
Multifamily	18C347P026	18C347P026	18C347P026_2	4	6.5
Multifamily	18C347P034	18C347P034	18C347P034_2	4	3
Multifamily	18C347P013	18C347P013	18C347P013	4	5
Multifamily	18B168P010	18B168P010	18B168P010_2	4	4
Multifamily	18B168P011	18B168P011	18B168P011_2	4	3
Multifamily	18B168P016	18B168P016	18B168P016	4	4
Multifamily	18C346P056	18C346P056	18C346P056_3	4	3
Multifamily	18C346P078	18C346P078	18C346P078_2	4	4
Multifamily	18C346P020	18C346P020	18C346P020_1	4	3
Multifamily	18C346P086	18C346P086	18C346P086_7	4	4
Multifamily	18C346P085	18C346P085	18C346P085_1	4	2.5
Multifamily	18B168P080	18B168P080	18B168P080	4	2.5
Multifamily	18C347P071	18C347P071	18C347P071_2	4	2.5
Multifamily	18C347P048	18C347P048	18C347P048_5	4	4.5
Multifamily	18C347P047	18C347P047	18C347P047_2	4	3.5
Multifamily	18C342P053	18C342P053	18C342P053	4	4
Multifamily	18C342P069	18C342P069	18C342P069_1	4	2.5
Multifamily	18C343P005	18C343P005	18C343P005_3	4	2.5
Multifamily	18B168P063	18B168P063	18B168P063_1	4	3
Multifamily	18C343P085	18C343P085	18C343P085_1	4	3
Multifamily	18C343P086	18C343P086	18C343P086_3	4	4.5
Multifamily	18C343P076	18C343P076	18C343P076_4	4	4
Multifamily	18C343P076	18C343P076	18C343P076_5	4	3
Multifamily	18C343P016	18C343P016	18C343P016_4	4	4
Multifamily	18C343P046	18C343P046	18C343P046_2	4	3
Multifamily	18C342P019	18C342P019	18C342P019_3	4	2
Multifamily	18C346P046	18C346P046	18C346P046_1	4	2.5
Multifamily	18C342P016	18C342P016	18C342P016_1	4	3
Multifamily	18C342P009	18C342P009	18C342P009_2	4	3
Multifamily	18C343P039	18C343P039	18C343P039_2	4	3
Multifamily	18B168P036	18B168P036	18B168P036_2	4	4
Multifamily	18C343P064	18C343P064	18C343P064_3	4	4
Multifamily	18B168P013	18B168P013	18B168P013	4	3
Multifamily	18C346P053	18C346P053	18C346P053_2	4	2.5
Multifamily	18C346P071	18C346P071	18C346P071_4	4	4.5
Multifamily	18C346P078	18C346P078	18C346P078_3	4	4
Multifamily	18C346P072	18C346P072	18C346P072_6	4	4
Multifamily	18C346P020	18C346P020	18C346P020_2	4	2
Multifamily	18C346P023	18C346P023	18C346P023_3	4	4
Multifamily	18C347P073	18C347P073	18C347P073	4	3
Multifamily	18C347P052	18C347P052	18C347P052	4	3.5
Multifamily	18C343P005	18C343P005	18C343P005_4	4	2
Multifamily	18C342P095	18C342P095	18C342P095_2	4	2
Multifamily	18B168P030	18B168P030	18B168P030	4	2.5
Multifamily	18B168P062	18B168P062	18B168P062_1	4	1.5
Multifamily	08C123P001	UCD_Royal_Royce	08C123P001_2	6	3
Multifamily	18C347P079	18C347P079	18C347P079_1	4	4
Multifamily	18C342P017	18C342P017	18C342P017_1	4	4
Multifamily	18C346P044	18C346P044	18C346P044_3	4	2.5
Multifamily	18C343P044	18C343P044	18C343P044_4	4	2.5
Multifamily	18C347P002	18C347P002	18C347P002_2	4	5
Multifamily	18C343P100	18C343P100	18C343P100	4	3.5
Multifamily	18C343P019	18C343P019	18C343P019_2	4	3.5
Multifamily	18C347P026	18C347P026	18C347P026_3	4	2
Multifamily	18C347P034	18C347P034	18C347P034_3	4	3
Multifamily	18C347P012	18C347P012	18C347P012	4	2.5
Multifamily	18C346P054	18C346P054	18C346P054_1	4	3.5
Multifamily	18C346P064	18C346P064	18C346P064_2	4	4
Multifamily	18C346P073	18C346P073	18C346P073_3	4	4
Multifamily	18C342P069	18C342P069	18C342P069_2	4	2.5
Multifamily	18C343P003	18C343P003	18C343P003	4	2.5
Multifamily	18C343P009	18C343P009	18C343P009_3	4	2.5
Multifamily	18B168P057	18B168P057	18B168P057_1	4	2.5
Multifamily	08C123P001	UCD_Royal_Royce	08C123P001_3	6	2.5
Multifamily	08C123P001	UCD_Royal_Royce	08C123P001_4	6	3
Multifamily	08C123P001	UCD_Royal_Royce	08C123P001_5	6	3
Multifamily	08C123P001	UCD_Royal_Royce	08C123P001_6	6	6.5
Multifamily	08C123P001	UCD_Royal_Royce	08C123P001_7	6	3
Multifamily	18C347P085	18C347P085	18C347P085_5	4	2.5
Multifamily	18C343P013	18C343P013	18C343P013	4	5.5
Multifamily	18C343P014	18C343P014	18C343P014_1	4	4.5
Multifamily	18C343P018	18C343P018	18C343P018_5	4	3
Multifamily	18C342P029	18C342P029	18C342P029_3	4	4
Multifamily	18C343P049	18C343P049	18C343P049_1	4	2
Multifamily	18C343P053	18C343P053	18C343P053_3	4	3
Multifamily	18C342P021	18C342P021	18C342P021_1	4	3
Multifamily	18C346P048	18C346P048	18C346P048_2	4	4
Multifamily	18C346P048	18C346P048	18C346P048_3	4	4
Multifamily	18C342P090	18C342P090	18C342P090_2	4	3
Multifamily	18C342P016	18C342P016	18C342P016_2	4	2.5
Multifamily	18B168P009	18B168P009	18B168P009	4	2.5
Multifamily	18C347P010	18C347P010	18C347P010_4	4	3
Multifamily	18C347P010	18C347P010	18C347P010_5	4	3.5
Multifamily	18C347P006	18C347P006	18C347P006_2	4	4.5
Multifamily	18C342P080	18C342P080	18C342P080_4	4	3
Multifamily	18C342P082	18C342P082	18C342P082_2	4	2.5
Multifamily	18C343P070	18C343P070	18C343P070_6	4	3
Multifamily	18C343P058	18C343P058	18C343P058	4	4.5
Multifamily	18C343P060	18C343P060	18C343P060_3	4	3.5
Multifamily	18C347P026	18C347P026	18C347P026_4	4	4
Multifamily	18C347P014	18C347P014	18C347P014_2	4	3.5
Multifamily	18C347P014	18C347P014	18C347P014_3	4	4
Multifamily	18B168P018	18B168P018	18B168P018_3	4	2
Multifamily	18C346P023	18C346P023	18C346P023_4	4	3.5
Multifamily	18B168P087	18B168P087	18B168P087_4	4	2
Multifamily	18B168P083	18B168P083	18B168P083	4	2.5
Multifamily	18B168P081	18B168P081	18B168P081_1	4	3.5
Multifamily	18C347P058	18C347P058	18C347P058_6	4	4.5
Multifamily	18C347P052	18C347P052	18C347P052_1	4	2.5
Multifamily	18C342P093	18C342P093	18C342P093	4	2.5
Multifamily	18B168P052	18B168P052	18B168P052_1	4	2
Multifamily	18B168P053	18B168P053	18B168P053	4	2
Multifamily	08C123P001	UCD_Royal_Royce	08C123P001	7	10.5
Multifamily	18C343P089	18C343P089	18C343P089_1	4	4
Multifamily	18C343P090	18C343P090	18C343P090	4	6
Multifamily	18C343P085	18C343P085	18C343P085_2	4	5.5
Multifamily	18C343P081	18C343P081	18C343P081_4	4	2
Multifamily	18C343P083	18C343P083	18C343P083_3	4	4
Multifamily	18C347P093	18C347P093	18C347P093_3	4	3
Multifamily	18C347P081	18C347P081	18C347P081_2	4	3
Multifamily	18C342P036	18C342P036	18C342P036_1	4	4.5
Multifamily	18C343P011	18C343P011	18C343P011_5	4	5
Multifamily	18C343P048	18C343P048	18C343P048	4	4
Multifamily	18C343P051	18C343P051	18C343P051_1	4	4.5
Multifamily	18C347P011	18C347P011	18C347P011_4	4	4
Multifamily	18C347P011	18C347P011	18C347P011_5	4	4
Multifamily	18C347P006	18C347P006	18C347P006_3	4	2
Multifamily	18C343P032	18C343P032	18C343P032_2	4	3.5
Multifamily	18C343P026	18C343P026	18C343P026_3	4	2.5
Multifamily	18C343P060	18C343P060	18C343P060_4	4	4
Multifamily	18C346P099	18C346P099	18C346P099_5	4	3.5
Multifamily	18C347P040	18C347P040	18C347P040_3	4	3.5
Multifamily	18C347P042	18C347P042	18C347P042_6	4	2.5
Multifamily	18C347P029	18C347P029	18C347P029_6	4	4
Multifamily	18C346P054	18C346P054	18C346P054_2	4	3
Multifamily	18C346P063	18C346P063	18C346P063_2	4	4
Multifamily	18C346P079	18C346P079	18C346P079_6	4	3
Multifamily	18B168P100	18B168P100	18B168P100	4	3.5
Multifamily	18C347P077	18C347P077	18C347P077_2	4	3
Multifamily	18C347P071	18C347P071	18C347P071_3	4	3.5
Multifamily	18C347P071	18C347P071	18C347P071_4	4	3.5
Multifamily	18C347P054	18C347P054	18C347P054	4	2.5
Multifamily	18C347P061	18C347P061	18C347P061_1	4	4
Multifamily	18C342P068	18C342P068	18C342P068_1	4	4.5
Multifamily	18C343P010	18C343P010	18C343P010_1	4	5
Multifamily	18B168P055	18B168P055	18B168P055	4	4
Multifamily	16C108P065	16C108P065	16C108P065_1	4	3
Multifamily	18C343P089	18C343P089	18C343P089_2	4	5.5
Multifamily	18C343P081	18C343P081	18C343P081_5	4	3
Multifamily	18C343P083	18C343P083	18C343P083_4	4	4
Multifamily	18C346P030	18C346P030	18C346P030_1	4	4
Multifamily	18C346P049	18C346P049	18C346P049_5	4	3.5
Multifamily	18C342P091	18C342P091	18C342P091_5	4	3
Multifamily	18C346P037	18C346P037	18C346P037_4	4	4
Multifamily	18C347P007	18C347P007	18C347P007_2	4	4
Multifamily	18C347P005	18C347P005	18C347P005_2	4	2.5
Multifamily	18C342P002	18C342P002	18C342P002_3	4	3
Multifamily	18C343P095	18C343P095	18C343P095_2	4	3.5
Multifamily	18C343P032	18C343P032	18C343P032_3	4	2.5
Multifamily	18C343P021	18C343P021	18C343P021_4	4	2.5
Multifamily	18B168P050	18B168P050	18B168P050	4	1.5
Multifamily	18B168P036	18B168P036	18B168P036_3	4	4
Multifamily	18C343P068	18C343P068	18C343P068_1	4	3
Multifamily	18C347P026	18C347P026	18C347P026_5	4	5
Multifamily	18C347P030	18C347P030	18C347P030_5	4	4
Multifamily	18B168P016	18B168P016	18B168P016_1	4	3.5
Multifamily	18C346P056	18C346P056	18C346P056_4	4	2
Multifamily	18C346P054	18C346P054	18C346P054_3	4	3
Multifamily	18C346P078	18C346P078	18C346P078_4	4	4
Multifamily	18C346P023	18C346P023	18C346P023_5	4	3.5
Multifamily	18C342P093	18C342P093	18C342P093_1	4	3
Multifamily	18C343P092	18C343P092	18C343P092_2	4	6.5
Multifamily	18C347P092	18C347P092	18C347P092_1	4	2.5
Multifamily	18C342P041	18C342P041	18C342P041_2	4	4
Multifamily	18C343P049	18C343P049	18C343P049_2	4	4
Multifamily	18C343P049	18C343P049	18C343P049_3	4	4
Multifamily	18C342P018	18C342P018	18C342P018_2	4	3.5
Multifamily	18C342P019	18C342P019	18C342P019_4	4	4
Multifamily	18C346P048	18C346P048	18C346P048_4	4	3.5
Multifamily	18C343P042	18C343P042	18C343P042_2	4	3
Multifamily	18B168P009	18B168P009	18B168P009_1	4	2.5
Multifamily	18C343P098	18C343P098	18C343P098_6	4	4.5
Multifamily	18C346P097	18C346P097	18C346P097_5	4	3.5
Multifamily	18C347P041	18C347P041	18C347P041_3	4	4
Multifamily	18C347P016	18C347P016	18C347P016_2	4	2.5
Multifamily	18C347P015	18C347P015	18C347P015_2	4	3
Multifamily	18B168P013	18B168P013	18B168P013_1	4	3
Multifamily	18C347P089	18C347P089	18C347P089_1	4	3.5
Multifamily	18C342P043	18C342P043	18C342P043_1	4	8
Multifamily	18C342P034	18C342P034	18C342P034_1	4	4
Multifamily	18C342P035	18C342P035	18C342P035_1	4	3
Multifamily	18C343P046	18C343P046	18C343P046_3	4	3
Multifamily	18C342P019	18C342P019	18C342P019_5	4	4
Multifamily	18C346P045	18C346P045	18C346P045_3	4	3
Multifamily	18C346P050	18C346P050	18C346P050_6	4	4
Multifamily	18C342P091	18C342P091	18C342P091_6	4	3.5
Multifamily	18C343P042	18C343P042	18C343P042_3	4	2
Multifamily	18C343P045	18C343P045	18C343P045_5	4	3
Multifamily	18C347P006	18C347P006	18C347P006_4	4	3
Multifamily	18C342P080	18C342P080	18C342P080_5	4	2.5
Multifamily	18C342P078	18C342P078	18C342P078_1	4	2.5
Multifamily	18B168P046	18B168P046	18B168P046	4	1.5
Multifamily	18B168P037	18B168P037	18B168P037	4	3
Multifamily	18C346P097	18C346P097	18C346P097_6	4	6
Multifamily	18C347P028	18C347P028	18C347P028_2	4	3.5
Multifamily	18C347P019	18C347P019	18C347P019	4	4
Multifamily	18C347P015	18C347P015	18C347P015_3	4	2.5
Multifamily	18C347P012	18C347P012	18C347P012_1	4	3
Multifamily	18B168P018	18B168P018	18B168P018_4	4	2.5
Multifamily	18C346P067	18C346P067	18C346P067_3	4	4
Multifamily	18C346P073	18C346P073	18C346P073_4	4	2
Multifamily	18B168P077	18B168P077	18B168P077	4	3
Multifamily	18C343P005	18C343P005	18C343P005_5	4	2
Multifamily	18C343P006	18C343P006	18C343P006	4	3
Multifamily	18B168P064	18B168P064	18B168P064_1	4	2
Multifamily	18B168P067	18B168P067	18B168P067	4	3
Multifamily	18B168P058	18B168P058	18B168P058_1	4	2
Multifamily	18C347P099	18C347P099	18C347P099_1	4	4.5
Multifamily	18C347P100	18C347P100	18C347P100	4	2
Multifamily	18C347P095	18C347P095	18C347P095_3	4	4
Multifamily	18C343P013	18C343P013	18C343P013_1	4	5
Multifamily	18C343P013	18C343P013	18C343P013_2	4	11
Multifamily	18C343P014	18C343P014	18C343P014_2	4	4.5
Multifamily	18C343P049	18C343P049	18C343P049_4	4	5.5
Multifamily	18C343P039	18C343P039	18C343P039_3	4	4
Multifamily	18C346P035	18C346P035	18C346P035	4	3.5
Multifamily	18C343P099	18C343P099	18C343P099_3	4	3.5
Multifamily	18C343P095	18C343P095	18C343P095_3	4	8.5
Multifamily	18B168P047	18B168P047	18B168P047_1	4	2
Multifamily	18C343P060	18C343P060	18C343P060_5	4	4.5
Multifamily	18C347P022	18C347P022	18C347P022_3	4	7.5
Multifamily	18C347P018	18C347P018	18C347P018_3	4	2
Multifamily	18C347P015	18C347P015	18C347P015_4	4	3.5
Multifamily	18C347P014	18C347P014	18C347P014_4	4	4.5
Multifamily	18C347P055	18C347P055	18C347P055_1	4	5.5
Multifamily	18C343P005	18C343P005	18C343P005_6	4	2.5
Multifamily	18B168P062	18B168P062	18B168P062_2	4	3
Multifamily	18B168P051	18B168P051	18B168P051_1	4	3
Multifamily	08C123P001	UCD_Royal_Royce	08C123P001_1	7	11
Multifamily	18C343P088	18C343P088	18C343P088_2	4	3
Multifamily	18C343P092	18C343P092	18C343P092_3	4	4
Multifamily	18C343P081	18C343P081	18C343P081_6	4	4
Multifamily	18C342P047	18C342P047	18C342P047_2	4	4
Multifamily	18C343P013	18C343P013	18C343P013_3	4	11
Multifamily	18C342P027	18C342P027	18C342P027_1	4	4.5
Multifamily	18C347P011	18C347P011	18C347P011_6	4	3
Multifamily	18C343P032	18C343P032	18C343P032_4	4	3.5
Multifamily	18C347P035	18C347P035	18C347P035_2	4	4.5
Multifamily	18B168P013	18B168P013	18B168P013_2	4	3
Multifamily	18C346P067	18C346P067	18C346P067_4	4	3.5
Multifamily	18C346P076	18C346P076	18C346P076_1	4	3.5
Multifamily	18C346P089	18C346P089	18C346P089_2	4	4
Multifamily	18B168P088	18B168P088	18B168P088	4	2
Multifamily	18B168P085	18B168P085	18B168P085	4	3
Multifamily	18C342P097	18C342P097	18C342P097	4	4.5
Multifamily	18B168P051	18B168P051	18B168P051_2	4	3.5
Multifamily	18C347P089	18C347P089	18C347P089_2	4	2.5
Multifamily	18C347P083	18C347P083	18C347P083_1	4	3.5
Multifamily	18C342P092	18C342P092	18C342P092_2	4	7
Multifamily	18C343P042	18C343P042	18C343P042_4	4	4
Multifamily	18C347P026	18C347P026	18C347P026_6	4	7
Multifamily	18C347P034	18C347P034	18C347P034_4	4	4
Multifamily	18C347P022	18C347P022	18C347P022_4	4	7
Multifamily	18C347P022	18C347P022	18C347P022_5	4	1
Multifamily	18C347P018	18C347P018	18C347P018_4	4	2.5
Multifamily	18C346P073	18C346P073	18C346P073_5	4	4
Multifamily	18C347P046	18C347P046	18C347P046_5	4	3
Multifamily	18C342P057	18C342P057	18C342P057	4	7
Multifamily	18C343P008	18C343P008	18C343P008_2	4	2.5
Multifamily	18C342P093	18C342P093	18C342P093_2	4	5
Multifamily	16C108P065	16C108P065	16C108P065_2	4	3
Multifamily	18C343P089	18C343P089	18C343P089_3	4	6.5
Multifamily	18C343P090	18C343P090	18C343P090_1	4	4
Multifamily	18C347P092	18C347P092	18C347P092_2	4	3
Multifamily	18C347P093	18C347P093	18C347P093_4	4	2.5
Multifamily	18C347P081	18C347P081	18C347P081_3	4	5.5
Multifamily	18C343P049	18C343P049	18C343P049_5	4	2
Multifamily	18C343P053	18C343P053	18C343P053_4	4	6.5
Multifamily	18C346P050	18C346P050	18C346P050_7	4	3
Multifamily	18C342P076	18C342P076	18C342P076_1	4	3
Multifamily	18C343P035	18C343P035	18C343P035_2	4	3.5
Multifamily	18C343P019	18C343P019	18C343P019_3	4	3.5
Multifamily	18C343P060	18C343P060	18C343P060_6	4	4.5
Multifamily	18C346P095	18C346P095	18C346P095_1	4	3
Multifamily	18C347P044	18C347P044	18C347P044	4	3
Multifamily	18C347P034	18C347P034	18C347P034_5	4	3.5
Multifamily	18C347P034	18C347P034	18C347P034_6	4	6
Multifamily	18C347P018	18C347P018	18C347P018_5	4	3
Multifamily	18C347P014	18C347P014	18C347P014_5	4	7
Multifamily	18C346P053	18C346P053	18C346P053_3	4	3.5
Multifamily	18C346P073	18C346P073	18C346P073_6	4	3.5
Multifamily	18B168P100	18B168P100	18B168P100_1	4	2.5
Multifamily	18B168P086	18B168P086	18B168P086_1	4	3.5
Multifamily	18C347P077	18C347P077	18C347P077_3	4	2.5
Multifamily	18C342P053	18C342P053	18C342P053_1	4	3
Multifamily	18C347P095	18C347P095	18C347P095_4	4	6
Multifamily	18C343P014	18C343P014	18C343P014_3	4	3.5
Multifamily	18C343P014	18C343P014	18C343P014_4	4	5.5
Multifamily	18C343P046	18C343P046	18C343P046_4	4	3
Multifamily	18C343P058	18C343P058	18C343P058_1	4	3
Multifamily	18C346P098	18C346P098	18C346P098_1	4	4
Multifamily	18C346P098	18C346P098	18C346P098_2	4	7.5
Multifamily	18C346P095	18C346P095	18C346P095_2	4	3
Multifamily	18C346P096	18C346P096	18C346P096_1	4	4.5
Multifamily	18C347P044	18C347P044	18C347P044_1	4	2.5
Multifamily	18C347P014	18C347P014	18C347P014_6	4	5
Multifamily	18C346P059	18C346P059	18C346P059	4	6.5
Multifamily	18C346P085	18C346P085	18C346P085_2	4	2.5
Multifamily	18B168P078	18B168P078	18B168P078	4	3.5
Multifamily	18B168P058	18B168P058	18B168P058_2	4	2.5
Multifamily	05C197P002	05C197P002	05C197P002_5	4	3
Multifamily	08C123P001	UCD_Royal_Royce	08C123P001_2	7	10
Multifamily	18C343P092	18C343P092	18C343P092_4	4	5
Multifamily	18C343P046	18C343P046	18C343P046_5	4	2
Multifamily	18C343P039	18C343P039	18C343P039_4	4	2
Multifamily	18B168P007	18B168P007	18B168P007_1	4	2.5
Multifamily	18C347P007	18C347P007	18C347P007_3	4	3
Multifamily	18C342P083	18C342P083	18C342P083_2	4	4
Multifamily	18C343P093	18C343P093	18C343P093_1	4	3
Multifamily	18C343P032	18C343P032	18C343P032_5	4	3
Multifamily	18C343P034	18C343P034	18C343P034_2	4	9
Multifamily	18C347P042	18C347P042	18C347P042_7	4	3.5
Multifamily	18C346P072	18C346P072	18C346P072_7	4	5
Multifamily	18B168P098	18B168P098	18B168P098_2	4	2
Multifamily	18C347P067	18C347P067	18C347P067_1	4	2
Multifamily	18C347P056	18C347P056	18C347P056_3	4	3
Multifamily	18B168P055	18B168P055	18B168P055_1	4	2
Multifamily	08C123P001	UCD_Royal_Royce	08C123P001_3	7	8
Multifamily	16C108P065	16C108P065	16C108P065_3	4	2
Multifamily	18C343P048	18C343P048	18C343P048_1	4	4
Multifamily	18B168P042	18B168P042	18B168P042	4	2
Multifamily	18B168P038	18B168P038	18B168P038_2	4	2
Multifamily	18C347P040	18C347P040	18C347P040_4	4	5.5
Multifamily	18C347P018	18C347P018	18C347P018_6	4	2
Multifamily	18B168P073	18B168P073	18B168P073	4	4.5
Multifamily	18C342P093	18C342P093	18C342P093_3	4	3
Multifamily	18B168P055	18B168P055	18B168P055_2	4	4
Multifamily	18C347P093	18C347P093	18C347P093_5	4	2.5
Multifamily	18C346P030	18C346P030	18C346P030_2	4	3
Multifamily	18C343P048	18C343P048	18C343P048_2	4	2
Multifamily	18B168P004	18B168P004	18B168P004_1	4	3
Multifamily	18C346P096	18C346P096	18C346P096_2	4	5.5
Multifamily	18C347P034	18C347P034	18C347P034_7	4	4.5
Multifamily	18C347P023	18C347P023	18C347P023_7	4	3
Multifamily	18C347P012	18C347P012	18C347P012_2	4	3
Multifamily	18C346P059	18C346P059	18C346P059_1	4	4
Multifamily	18B168P097	18B168P097	18B168P097	4	2.5
Multifamily	18C343P006	18C343P006	18C343P006_1	4	3.5
Multifamily	18C342P093	18C342P093	18C342P093_4	4	2
Multifamily	18B168P025	18B168P025	18B168P025	4	2
Multifamily	18B168P067	18B168P067	18B168P067_1	4	2.5
Multifamily	18B168P055	18B168P055	18B168P055_3	4	2
Multifamily	08C123P001	UCD_Royal_Royce	08C123P001_4	7	8
Multifamily	18C343P092	18C343P092	18C343P092_5	4	4
Multifamily	18C347P095	18C347P095	18C347P095_5	4	3.5
Multifamily	18C346P030	18C346P030	18C346P030_3	4	3
Multifamily	18C346P096	18C346P096	18C346P096_3	4	6.5
Multifamily	18C347P018	18C347P018	18C347P018_7	4	3
Multifamily	18C347P014	18C347P014	18C347P014_7	4	4
Multifamily	18B168P013	18B168P013	18B168P013_3	4	2
Multifamily	18B168P099	18B168P099	18B168P099_1	4	4
Multifamily	18B168P085	18B168P085	18B168P085_1	4	2.5
Multifamily	18C347P074	18C347P074	18C347P074_2	4	3
Multifamily	18C347P071	18C347P071	18C347P071_5	4	2.5
Multifamily	18C347P052	18C347P052	18C347P052_2	4	5
Multifamily	18C343P085	18C343P085	18C343P085_3	4	3
Multifamily	18C342P042	18C342P042	18C342P042_1	4	3
Multifamily	18C346P030	18C346P030	18C346P030_4	4	4
Multifamily	18C346P044	18C346P044	18C346P044_4	4	3
Multifamily	18C347P007	18C347P007	18C347P007_4	4	3.5
Multifamily	18C343P095	18C343P095	18C343P095_4	4	2
Multifamily	18C346P097	18C346P097	18C346P097_7	4	4
Multifamily	18C347P036	18C347P036	18C347P036_4	4	2
Multifamily	18C346P053	18C346P053	18C346P053_4	4	4.5
Multifamily	18C347P061	18C347P061	18C347P061_2	4	3
Multifamily	18B168P065	18B168P065	18B168P065	4	1.5
Multifamily	18B168P050	18B168P050	18B168P050_1	4	3
Multifamily	18C347P043	18C347P043	18C347P043	4	7.5
Multifamily	18C347P012	18C347P012	18C347P012_3	4	4
Multifamily	18C346P059	18C346P059	18C346P059_2	4	3.5
Multifamily	18B168P088	18B168P088	18B168P088_1	4	2.5
Multifamily	18B168P077	18B168P077	18B168P077_1	4	4
Multifamily	18B168P072	18B168P072	18B168P072	4	3
Multifamily	18C347P100	18C347P100	18C347P100_1	4	6
Multifamily	18C342P037	18C342P037	18C342P037_1	4	4
Multifamily	18C347P095	18C347P095	18C347P095_6	4	5
Multifamily	18C343P048	18C343P048	18C343P048_3	4	3
Multifamily	18C343P049	18C343P049	18C343P049_6	4	2
Multifamily	18C346P048	18C346P048	18C346P048_5	4	3.5
Multifamily	18C347P011	18C347P011	18C347P011_7	4	3.5
Multifamily	18C343P021	18C343P021	18C343P021_5	4	3
Multifamily	18B168P036	18B168P036	18B168P036_4	4	3
Multifamily	18B168P035	18B168P035	18B168P035_1	4	3.5
Multifamily	18C347P044	18C347P044	18C347P044_2	4	3.5
Multifamily	18B168P072	18B168P072	18B168P072_1	4	2.5
Multifamily	18C343P008	18C343P008	18C343P008_3	4	7.5
Multifamily	18B168P053	18B168P053	18B168P053_1	4	3
Multifamily	18C347P081	18C347P081	18C347P081_4	4	3.5
Multifamily	18C346P030	18C346P030	18C346P030_5	4	3.5
Multifamily	18C346P030	18C346P030	18C346P030_6	4	4
Multifamily	18C347P006	18C347P006	18C347P006_5	4	3
Multifamily	18C343P093	18C343P093	18C343P093_2	4	5.5
Multifamily	18B168P045	18B168P045	18B168P045_5	4	2
Multifamily	18C347P043	18C347P043	18C347P043_1	4	6.5
Multifamily	18C347P012	18C347P012	18C347P012_4	4	2
Multifamily	18B168P016	18B168P016	18B168P016_2	4	3.5
Multifamily	18B168P052	18B168P052	18B168P052_2	4	4.5
Multifamily	18C347P083	18C347P083	18C347P083_2	4	5
Multifamily	18C342P038	18C342P038	18C342P038_2	4	8.5
Multifamily	18C342P029	18C342P029	18C342P029_4	4	4
Multifamily	18C343P046	18C343P046	18C343P046_6	4	2
Multifamily	18C346P045	18C346P045	18C346P045_4	4	2.5
Multifamily	18B168P047	18B168P047	18B168P047_2	4	4
Multifamily	18C347P012	18C347P012	18C347P012_5	4	3.5
Multifamily	18C347P012	18C347P012	18C347P012_6	4	3.5
Multifamily	18B168P014	18B168P014	18B168P014	4	2
Multifamily	18C346P053	18C346P053	18C346P053_5	4	3.5
Multifamily	18C346P078	18C346P078	18C346P078_5	4	3
Multifamily	18C346P073	18C346P073	18C346P073_7	4	3
Multifamily	18C343P051	18C343P051	18C343P051_2	4	3.5
Multifamily	18C346P050	18C346P050	18C346P050_8	4	3
Multifamily	18B168P079	18B168P079	18B168P079_1	4	2
Multifamily	18C347P050	18C347P050	18C347P050	4	4.5
Multifamily	18B168P063	18B168P063	18B168P063_2	4	5
Multifamily	18B168P065	18B168P065	18B168P065_1	4	3
Multifamily	18C347P095	18C347P095	18C347P095_7	4	3.5
Multifamily	18C346P035	18C346P035	18C346P035_1	4	4
Multifamily	18B168P042	18B168P042	18B168P042_1	4	1.5
Multifamily	18C347P043	18C347P043	18C347P043_2	4	NA
Multifamily	18B168P099	18B168P099	18B168P099_2	4	2.5
Multifamily	18C347P073	18C347P073	18C347P073_1	4	3
Multifamily	18C342P072	18C342P072	18C342P072_1	4	5
Multifamily	18B168P019	18B168P019	18B168P019	4	2
Multifamily	18B168P065	18B168P065	18B168P065_2	4	3.5
Multifamily	18B168P055	18B168P055	18B168P055_4	4	2
Multifamily	18C343P075	18C343P075	18C343P075_1	4	5
Multifamily	18C346P052	18C346P052	18C346P052_1	4	3.5
Multifamily	18C347P012	18C347P012	18C347P012_7	4	6.5
Multifamily	18C347P073	18C347P073	18C347P073_2	4	3.5
Multifamily	18B168P065	18B168P065	18B168P065_3	4	3
Multifamily	18C343P083	18C343P083	18C343P083_5	4	5.5
Multifamily	18C343P014	18C343P014	18C343P014_5	4	4
Multifamily	18C343P081	18C343P081	18C343P081_7	4	5
Multifamily	18C347P083	18C347P083	18C347P083_3	4	3.5
Multifamily	18C343P006	18C343P006	18C343P006_2	4	4.5
Multifamily	18C343P006	18C343P006	18C343P006_3	4	9.5
Multifamily	18C343P077	18C343P077	18C343P077_3	4	3
Multifamily	18C343P014	18C343P014	18C343P014_6	4	5
Multifamily	18C342P061	18C342P061	18C342P061	4	4
Multifamily	18C342P020	18C342P020	18C342P020	4	4
Multifamily	18B168P038	18B168P038	18B168P038_3	4	2.5
Multifamily	18B168P013	18B168P013	18B168P013_4	4	1.5
Multifamily	18B168P013	18B168P013	18B168P013_5	4	3
Multifamily	18B168P097	18B168P097	18B168P097_1	4	4.5
Multifamily	18B168P067	18B168P067	18B168P067_2	4	2.5
Multifamily	18B168P055	18B168P055	18B168P055_5	4	4
Multifamily	18B168P051	18B168P051	18B168P051_3	4	3.5
Multifamily	18C347P095	18C347P095	18C347P095_8	4	3
Multifamily	18C342P002	18C342P002	18C342P002_4	4	5
Multifamily	18C342P002	18C342P002	18C342P002_5	4	4
Multifamily	18B168P031	18B168P031	18B168P031_5	4	2.5
Multifamily	18B168P044	18B168P044	18B168P044_1	4	4
Multifamily	18B168P044	18B168P044	18B168P044_2	4	4
Multifamily	18B168P086	18B168P086	18B168P086_2	4	3.5
Multifamily	18C347P044	18C347P044	18C347P044_3	4	4.5
Multifamily	18B168P053	18B168P053	18B168P053_2	4	3.5
Multifamily	18B168P053	18B168P053	18B168P053_3	4	3.5
Multifamily	18C346P052	18C346P052	18C346P052_2	4	2.5
Multifamily	18C343P075	18C343P075	18C343P075_2	4	4.5
Multifamily	18C343P048	18C343P048	18C343P048_4	4	3
Multifamily	18C346P088	18C346P088	18C346P088	4	4
Multifamily	18C347P043	18C347P043	18C347P043_3	4	NA
Multifamily	18B168P044	18B168P044	18B168P044_3	4	2.5
Multifamily	18C347P061	18C347P061	18C347P061_3	4	3.5
Multifamily	18B168P014	18B168P014	18B168P014_1	4	3
Multifamily	18C342P034	18C342P034	18C342P034_2	4	3
Multifamily	18C343P051	18C343P051	18C343P051_3	4	3
Multifamily	18C342P025	18C342P025	18C342P025_2	4	5
Multifamily	18C346P046	18C346P046	18C346P046_2	4	2.5
Multifamily	18C343P045	18C343P045	18C343P045_6	4	3
Multifamily	18B168P003	18B168P003	18B168P003_1	4	2.5
Multifamily	18C342P004	18C342P004	18C342P004	4	3
Multifamily	18C342P079	18C342P079	18C342P079	4	2
Multifamily	18B168P039	18B168P039	18B168P039_1	4	2.5
Multifamily	18C346P096	18C346P096	18C346P096_4	4	4
Multifamily	18C346P069	18C346P069	18C346P069_6	4	2.5
Multifamily	18C346P070	18C346P070	18C346P070_3	4	4.5
Multifamily	18C346P009	18C346P009	18C346P009_2	4	2
Multifamily	18C346P006	18C346P006	18C346P006_3	4	3
Multifamily	18C346P020	18C346P020	18C346P020_3	4	4
Multifamily	18C346P086	18C346P086	18C346P086_8	4	3.5
Multifamily	18B168P099	18B168P099	18B168P099_3	4	3
Multifamily	18C342P057	18C342P057	18C342P057_1	4	4
Multifamily	18C342P095	18C342P095	18C342P095_3	4	3.5
Multifamily	18B168P023	18B168P023	18B168P023_2	4	2.5
Multifamily	08C123P001	UCD_Royal_Royce	08C123P001_5	7	12
Multifamily	18C343P087	18C343P087	18C343P087	4	7
Multifamily	18C342P050	18C342P050	18C342P050_2	4	2
Multifamily	18C342P046	18C342P046	18C342P046_1	4	4.5
Multifamily	18C342P051	18C342P051	18C342P051_1	4	4
Multifamily	18C342P020	18C342P020	18C342P020_1	4	2
Multifamily	18C342P026	18C342P026	18C342P026_1	4	5.5
Multifamily	18C342P092	18C342P092	18C342P092_3	4	4.5
Multifamily	18C342P010	18C342P010	18C342P010	4	3
Multifamily	18C347P004	18C347P004	18C347P004_2	4	NA
Multifamily	18C343P032	18C343P032	18C343P032_6	4	3.5
Multifamily	18C343P021	18C343P021	18C343P021_6	4	2.5
Multifamily	18C346P095	18C346P095	18C346P095_3	4	6.5
Multifamily	18C346P096	18C346P096	18C346P096_5	4	6
Multifamily	18C347P044	18C347P044	18C347P044_4	4	3
Multifamily	18C347P030	18C347P030	18C347P030_6	4	3
Multifamily	18C347P031	18C347P031	18C347P031_6	4	2.5
Multifamily	18C347P019	18C347P019	18C347P019_1	4	2
Multifamily	18B168P010	18B168P010	18B168P010_3	4	3.5
Multifamily	18C346P053	18C346P053	18C346P053_6	4	NA
Multifamily	18C346P010	18C346P010	18C346P010_6	4	2.5
Multifamily	18C346P089	18C346P089	18C346P089_3	4	4
Multifamily	18B168P088	18B168P088	18B168P088_2	4	3
Multifamily	18C347P052	18C347P052	18C347P052_3	4	4
Multifamily	18C342P054	18C342P054	18C342P054_1	4	5
Multifamily	18C342P054	18C342P054	18C342P054_2	4	4
Multifamily	18C343P009	18C343P009	18C343P009_4	4	4
Multifamily	18C342P097	18C342P097	18C342P097_1	4	5
Multifamily	08C123P001	UCD_Royal_Royce	08C123P001_6	7	13
Multifamily	18C347P090	18C347P090	18C347P090_1	4	3
Multifamily	18C347P087	18C347P087	18C347P087_3	4	3
Multifamily	18C342P051	18C342P051	18C342P051_2	4	5
Multifamily	18B168P010	18B168P010	18B168P010	5	2
Multifamily	18C346P006	18C346P006	18C346P006	5	2
Multifamily	18C343P033	18C343P033	18C343P033	5	6
Multifamily	18C346P006	18C346P006	18C346P006_1	5	2
Multifamily	18C343P012	18C343P012	18C343P012	5	2
Multifamily	18C346P012	18C346P012	18C346P012	5	3
Multifamily	18C346P005	18C346P005	18C346P005	5	4
Multifamily	18C346P024	18C346P024	18C346P024	5	3
Multifamily	18C343P004	18C343P004	18C343P004	5	3
Multifamily	18C346P005	18C346P005	18C346P005_1	5	4
Multifamily	18C346P032	18C346P032	18C346P032	5	4.5
Multifamily	18C346P024	18C346P024	18C346P024_1	5	3.5
Multifamily	18C347P058	18C347P058	18C347P058	5	3.5
Multifamily	18C346P032	18C346P032	18C346P032_1	5	4
Multifamily	18B168P006	18B168P006	18B168P006	5	2.5
Multifamily	18B168P010	18B168P010	18B168P010_1	5	2.5
Multifamily	18C343P015	18C343P015	18C343P015	5	2.5
Multifamily	18C343P015	18C343P015	18C343P015_1	5	2
Multifamily	18C343P040	18C343P040	18C343P040	5	3
Multifamily	18C346P039	18C346P039	18C346P039	5	5
Multifamily	18C343P019	18C343P019	18C343P019	5	2.5
Multifamily	18C346P086	18C346P086	18C346P086	5	2.5
Multifamily	18C342P032	18C342P032	18C342P032	5	3
Multifamily	18C346P026	18C346P026	18C346P026	5	4
Multifamily	18C347P011	18C347P011	18C347P011	5	4
Multifamily	18C346P010	18C346P010	18C346P010	5	3
Multifamily	18C346P003	18C346P003	18C346P003	5	2
Multifamily	18C347P076	18C347P076	18C347P076	5	5
Multifamily	18C346P037	18C346P037	18C346P037	5	4
Multifamily	18C342P075	18C342P075	18C342P075	5	2.5
Multifamily	18C346P006	18C346P006	18C346P006_2	5	4.5
Multifamily	18C346P010	18C346P010	18C346P010_1	5	2.5
Multifamily	18C346P016	18C346P016	18C346P016	5	4
Multifamily	18C346P025	18C346P025	18C346P025	5	4
Multifamily	18C342P089	18C342P089	18C342P089	5	4
Multifamily	18C343P040	18C343P040	18C343P040_1	5	2.5
Multifamily	18C347P045	18C347P045	18C347P045	5	2
Multifamily	18C347P022	18C347P022	18C347P022	5	2.5
Multifamily	18C346P070	18C346P070	18C346P070	5	4
Multifamily	18C346P074	18C346P074	18C346P074	5	6
Multifamily	18C347P070	18C347P070	18C347P070	5	3.5
Multifamily	18C343P042	18C343P042	18C343P042	5	2.5
Multifamily	18C347P036	18C347P036	18C347P036	5	3
Multifamily	18C347P032	18C347P032	18C347P032	5	3
Multifamily	18C346P066	18C346P066	18C346P066	5	4
Multifamily	18C342P071	18C342P071	18C342P071	5	3
Multifamily	18C343P044	18C343P044	18C343P044	5	2
Multifamily	18C343P069	18C343P069	18C343P069	5	2
Multifamily	18C346P024	18C346P024	18C346P024_2	5	3.5
Multifamily	18C347P058	18C347P058	18C347P058_1	5	2.5
Multifamily	18C346P034	18C346P034	18C346P034	5	3.5
Multifamily	18C346P012	18C346P012	18C346P012_1	5	3
Multifamily	18C346P034	18C346P034	18C346P034_1	5	3
Multifamily	18C343P067	18C343P067	18C343P067	5	2.5
Multifamily	18B168P011	18B168P011	18B168P011	5	2
Multifamily	18C346P068	18C346P068	18C346P068	5	2
Multifamily	18C342P068	18C342P068	18C342P068	5	2
Multifamily	18C342P047	18C342P047	18C342P047	5	4
Multifamily	18C342P062	18C342P062	18C342P062	5	2
Multifamily	18C346P034	18C346P034	18C346P034_2	5	3
Multifamily	18C342P024	18C342P024	18C342P024	5	5
Multifamily	18C346P045	18C346P045	18C346P045	5	3.5
Multifamily	18C342P015	18C342P015	18C342P015	5	4
Multifamily	18C343P040	18C343P040	18C343P040_2	5	3
Multifamily	18C343P022	18C343P022	18C343P022	5	5
Multifamily	18C343P071	18C343P071	18C343P071	5	5
Multifamily	18C343P072	18C343P072	18C343P072	5	4
Multifamily	18C347P042	18C347P042	18C347P042	5	2.5
Multifamily	18C342P074	18C342P074	18C342P074	5	3
Multifamily	18C346P025	18C346P025	18C346P025_1	5	3.5
Multifamily	18C346P010	18C346P010	18C346P010_2	5	3
Multifamily	18C346P016	18C346P016	18C346P016_1	5	4
Multifamily	18C346P081	18C346P081	18C346P081	5	4
Multifamily	18C347P068	18C347P068	18C347P068	5	8
Multifamily	18C347P070	18C347P070	18C347P070_1	5	7
Multifamily	18C342P074	18C342P074	18C342P074_1	5	3
Multifamily	18C343P040	18C343P040	18C343P040_3	5	3
Multifamily	18C346P039	18C346P039	18C346P039_1	5	3
Multifamily	18C347P007	18C347P007	18C347P007	5	2.5
Multifamily	18C343P025	18C343P025	18C343P025	5	3
Multifamily	18C346P092	18C346P092	18C346P092	5	3.5
Multifamily	18C346P003	18C346P003	18C346P003_1	5	4
Multifamily	18C347P058	18C347P058	18C347P058_2	5	3
Multifamily	18C342P073	18C342P073	18C342P073	5	4
Multifamily	18C342P070	18C342P070	18C342P070	5	3
Multifamily	18C347P088	18C347P088	18C347P088	5	3
Multifamily	18C342P041	18C342P041	18C342P041	5	2.5
Multifamily	18C346P034	18C346P034	18C346P034_3	5	4
Multifamily	18C342P025	18C342P025	18C342P025	5	3.5
Multifamily	18C342P089	18C342P089	18C342P089_1	5	3
Multifamily	18C346P038	18C346P038	18C346P038	5	2
Multifamily	18C342P075	18C342P075	18C342P075_1	5	3.5
Multifamily	18C343P033	18C343P033	18C343P033_1	5	3
Multifamily	18C343P019	18C343P019	18C343P019_1	5	3.5
Multifamily	18C343P069	18C343P069	18C343P069_1	5	2
Multifamily	18C343P056	18C343P056	18C343P056	5	3.5
Multifamily	18C347P039	18C347P039	18C347P039	5	4
Multifamily	18B168P017	18B168P017	18B168P017	5	2
Multifamily	18C346P062	18C346P062	18C346P062	5	2.5
Multifamily	18C346P077	18C346P077	18C346P077	5	3
Multifamily	18C346P010	18C346P010	18C346P010_3	5	2.5
Multifamily	18C346P079	18C346P079	18C346P079	5	4
Multifamily	18C342P054	18C342P054	18C342P054	5	2.5
Multifamily	18C343P005	18C343P005	18C343P005	5	2
Multifamily	18C343P082	18C343P082	18C343P082	5	2.5
Multifamily	18C347P088	18C347P088	18C347P088_1	5	3.5
Multifamily	18C342P038	18C342P038	18C342P038	5	3.5
Multifamily	18C347P095	18C347P095	18C347P095	5	4
Multifamily	18C343P052	18C343P052	18C343P052	5	4.5
Multifamily	18C342P013	18C342P013	18C342P013	5	5
Multifamily	18C346P039	18C346P039	18C346P039_2	5	3.5
Multifamily	18C342P076	18C342P076	18C342P076	5	4.5
Multifamily	18C342P078	18C342P078	18C342P078	5	3.5
Multifamily	18C343P030	18C343P030	18C343P030	5	2.5
Multifamily	18C343P028	18C343P028	18C343P028	5	5
Multifamily	18C343P065	18C343P065	18C343P065	5	7.5
Multifamily	18C343P070	18C343P070	18C343P070	5	4.5
Multifamily	18C343P057	18C343P057	18C343P057	5	5
Multifamily	18B168P018	18B168P018	18B168P018	5	3
Multifamily	18C346P053	18C346P053	18C346P053	5	4.5
Multifamily	18C346P070	18C346P070	18C346P070_1	5	4.5
Multifamily	18C346P075	18C346P075	18C346P075	5	3
Multifamily	18C346P010	18C346P010	18C346P010_4	5	3.5
Multifamily	18C346P004	18C346P004	18C346P004	5	4
Multifamily	18C346P016	18C346P016	18C346P016_2	5	5
Multifamily	18B168P075	18B168P075	18B168P075	5	3
Multifamily	18C347P047	18C347P047	18C347P047	5	3.5
Multifamily	18C342P070	18C342P070	18C342P070_1	5	3
Multifamily	18C342P070	18C342P070	18C342P070_2	5	3
Multifamily	18C343P080	18C343P080	18C343P080	5	3
Multifamily	18C342P062	18C342P062	18C342P062_1	5	4
Multifamily	18C342P028	18C342P028	18C342P028	5	5.5
Multifamily	18C342P019	18C342P019	18C342P019	5	12
Multifamily	18C343P038	18C343P038	18C343P038	5	3
Multifamily	18C343P040	18C343P040	18C343P040_4	5	5
Multifamily	18C346P041	18C346P041	18C346P041	5	4.5
Multifamily	18C343P032	18C343P032	18C343P032	5	2.5
Multifamily	18C343P025	18C343P025	18C343P025_1	5	3.5
Multifamily	18C343P067	18C343P067	18C343P067_1	5	2.5
Multifamily	18C347P029	18C347P029	18C347P029	5	2.5
Multifamily	18C347P024	18C347P024	18C347P024	5	2.5
Multifamily	18C346P077	18C346P077	18C346P077_1	5	2
Multifamily	18C346P010	18C346P010	18C346P010_5	5	2
Multifamily	18C346P004	18C346P004	18C346P004_1	5	3.5
Multifamily	18C347P046	18C347P046	18C347P046	5	3.5
Multifamily	18C342P070	18C342P070	18C342P070_3	5	2.5
Multifamily	18C343P009	18C343P009	18C343P009	5	2.5
Multifamily	18C346P026	18C346P026	18C346P026_1	5	2.5
Multifamily	18C346P045	18C346P045	18C346P045_1	5	5
Multifamily	18C346P049	18C346P049	18C346P049	5	3.5
Multifamily	18C342P090	18C342P090	18C342P090	5	4
Multifamily	18C342P089	18C342P089	18C342P089_2	5	3
Multifamily	18C346P043	18C346P043	18C346P043	5	5
Multifamily	18C342P075	18C342P075	18C342P075_2	5	2.5
Multifamily	18C343P028	18C343P028	18C343P028_1	5	4.5
Multifamily	18C343P026	18C343P026	18C343P026	5	2
Multifamily	18C347P064	18C347P064	18C347P064	5	4
Multifamily	18C342P067	18C342P067	18C342P067	5	4
Multifamily	18C346P026	18C346P026	18C346P026_2	5	3.5
Multifamily	18C342P019	18C342P019	18C342P019_1	5	2.5
Multifamily	18C342P012	18C342P012	18C342P012	5	3
Multifamily	18C343P043	18C343P043	18C343P043	5	2.5
Multifamily	18C346P040	18C346P040	18C346P040	5	4
Multifamily	18C343P098	18C343P098	18C343P098	5	3
Multifamily	18C343P097	18C343P097	18C343P097	5	3.5
Multifamily	18C343P034	18C343P034	18C343P034	5	4
Multifamily	18C343P028	18C343P028	18C343P028_2	5	4
Multifamily	18C343P067	18C343P067	18C343P067_2	5	2.5
Multifamily	18C346P097	18C346P097	18C346P097	5	4
Multifamily	18C347P040	18C347P040	18C347P040	5	3.5
Multifamily	18C346P055	18C346P055	18C346P055	5	3.5
Multifamily	18C346P064	18C346P064	18C346P064	5	3.5
Multifamily	18C346P068	18C346P068	18C346P068_1	5	3.5
Multifamily	18C346P067	18C346P067	18C346P067	5	4.5
Multifamily	18C346P086	18C346P086	18C346P086_1	5	3.5
Multifamily	18C346P079	18C346P079	18C346P079_1	5	4
Multifamily	18C347P064	18C347P064	18C347P064_1	5	4
Multifamily	18C347P064	18C347P064	18C347P064_2	5	4
Multifamily	18C347P065	18C347P065	18C347P065	5	3.5
Multifamily	18C347P070	18C347P070	18C347P070_2	5	5.5
Multifamily	18C347P058	18C347P058	18C347P058_3	5	2
Multifamily	18C347P048	18C347P048	18C347P048	5	3.5
Multifamily	18C347P049	18C347P049	18C347P049	5	3.5
Multifamily	18C343P009	18C343P009	18C343P009_1	5	2.5
Multifamily	18C343P088	18C343P088	18C343P088	5	6
Multifamily	18C343P080	18C343P080	18C343P080_1	5	4.5
Multifamily	18C347P091	18C347P091	18C347P091	5	2.5
Multifamily	18C343P011	18C343P011	18C343P011	5	3
Multifamily	18C346P034	18C346P034	18C346P034_4	5	2.5
Multifamily	18C346P032	18C346P032	18C346P032_2	5	3.5
Multifamily	18C342P025	18C342P025	18C342P025_1	5	2.5
Multifamily	18C342P014	18C342P014	18C342P014	5	4
Multifamily	18C343P038	18C343P038	18C343P038_1	5	4
Multifamily	18C343P043	18C343P043	18C343P043_1	5	9
Multifamily	18C346P036	18C346P036	18C346P036	5	2.5
Multifamily	18C346P040	18C346P040	18C346P040_1	5	2.5
Multifamily	18C346P041	18C346P041	18C346P041_1	5	4.5
Multifamily	18C346P038	18C346P038	18C346P038_1	5	3.5
Multifamily	18C346P037	18C346P037	18C346P037_1	5	3
Multifamily	18C346P039	18C346P039	18C346P039_3	5	2.5
Multifamily	18C342P002	18C342P002	18C342P002	5	2.5
Multifamily	18C342P082	18C342P082	18C342P082	5	3.5
Multifamily	18C342P077	18C342P077	18C342P077	5	3
Multifamily	18B168P039	18B168P039	18B168P039	5	3.5
Multifamily	18B168P031	18B168P031	18B168P031	5	2.5
Multifamily	18C343P066	18C343P066	18C343P066	5	5
Multifamily	18C347P036	18C347P036	18C347P036_1	5	4
Multifamily	18C347P027	18C347P027	18C347P027	5	2.5
Multifamily	18C347P024	18C347P024	18C347P024_1	5	2.5
Multifamily	18C346P077	18C346P077	18C346P077_2	5	3.5
Multifamily	18B168P070	18B168P070	18B168P070	5	2.5
Multifamily	18C347P080	18C347P080	18C347P080	5	3
Multifamily	18C343P076	18C343P076	18C343P076	5	4.5
Multifamily	18C342P065	18C342P065	18C342P065	5	4
Multifamily	18C342P031	18C342P031	18C342P031	5	4
Multifamily	18C343P053	18C343P053	18C343P053	5	4
Multifamily	18C343P097	18C343P097	18C343P097_1	5	3.5
Multifamily	18C343P022	18C343P022	18C343P022_1	5	3.5
Multifamily	18C343P066	18C343P066	18C343P066_1	5	5
Multifamily	18C347P042	18C347P042	18C347P042_1	5	3
Multifamily	18C347P045	18C347P045	18C347P045_1	5	4
Multifamily	18C346P069	18C346P069	18C346P069	5	4.5
Multifamily	18C346P022	18C346P022	18C346P022	5	4.5
Multifamily	18C346P012	18C346P012	18C346P012_2	5	4
Multifamily	18C346P089	18C346P089	18C346P089	5	2.5
Multifamily	18C346P079	18C346P079	18C346P079_2	5	4.5
Multifamily	18B168P079	18B168P079	18B168P079	5	3.5
Multifamily	18C347P072	18C347P072	18C347P072	5	3
Multifamily	18C347P069	18C347P069	18C347P069	5	4
Multifamily	18C347P063	18C347P063	18C347P063	5	4.5
Multifamily	18C347P048	18C347P048	18C347P048_1	5	3.5
Multifamily	18C347P091	18C347P091	18C347P091_1	5	4
Multifamily	18C347P087	18C347P087	18C347P087	5	2.5
Multifamily	18C342P033	18C342P033	18C342P033	5	3.5
Multifamily	18C346P026	18C346P026	18C346P026_3	5	3.5
Multifamily	18C346P050	18C346P050	18C346P050	5	4
Multifamily	18C342P007	18C342P007	18C342P007	5	5
Multifamily	18C342P080	18C342P080	18C342P080	5	2.5
Multifamily	18C343P099	18C343P099	18C343P099	5	5.5
Multifamily	18C343P037	18C343P037	18C343P037	5	4.5
Multifamily	18C343P029	18C343P029	18C343P029	5	2.5
Multifamily	18C343P067	18C343P067	18C343P067_3	5	5
Multifamily	18C343P069	18C343P069	18C343P069_2	5	2.5
Multifamily	18C343P057	18C343P057	18C343P057_1	5	5
Multifamily	18C347P045	18C347P045	18C347P045_2	5	6.5
Multifamily	18C346P053	18C346P053	18C346P053_1	5	5.5
Multifamily	18C346P062	18C346P062	18C346P062_1	5	3
Multifamily	18C346P068	18C346P068	18C346P068_2	5	4
Multifamily	18C346P024	18C346P024	18C346P024_3	5	3
Multifamily	18C346P023	18C346P023	18C346P023	5	3
Multifamily	18C347P064	18C347P064	18C347P064_3	5	4
Multifamily	18C347P060	18C347P060	18C347P060	5	7.5
Multifamily	18C346P041	18C346P041	18C346P041_2	5	12.5
Multifamily	18B168P041	18B168P041	18B168P041	5	1.5
Multifamily	18C343P067	18C343P067	18C343P067_4	5	2.5
Multifamily	18C343P069	18C343P069	18C343P069_3	5	2
Multifamily	18C346P099	18C346P099	18C346P099	5	3
Multifamily	18C346P099	18C346P099	18C346P099_1	5	3
Multifamily	18C347P028	18C347P028	18C347P028	5	2.5
Multifamily	18C347P024	18C347P024	18C347P024_2	5	2.5
Multifamily	18C347P018	18C347P018	18C347P018	5	2.5
Multifamily	18C346P062	18C346P062	18C346P062_2	5	3
Multifamily	18C347P064	18C347P064	18C347P064_4	5	5
Multifamily	18C347P048	18C347P048	18C347P048_2	5	4
Multifamily	18C347P048	18C347P048	18C347P048_3	5	5.5
Multifamily	18C343P008	18C343P008	18C343P008	5	2
Multifamily	18C342P100	18C342P100	18C342P100	5	5.5
Multifamily	18C342P099	18C342P099	18C342P099	5	5
Multifamily	05C197P002	05C197P002	05C197P002	5	2
Multifamily	18C343P089	18C343P089	18C343P089	5	2.5
Multifamily	18C343P076	18C343P076	18C343P076_1	5	6
Multifamily	18C343P076	18C343P076	18C343P076_2	5	4
Multifamily	18C346P029	18C346P029	18C346P029	5	2.5
Multifamily	18C343P052	18C343P052	18C343P052_1	5	4
Multifamily	18C343P053	18C343P053	18C343P053_1	5	4
Multifamily	18C346P046	18C346P046	18C346P046	5	2.5
Multifamily	18C346P045	18C346P045	18C346P045_2	5	3.5
Multifamily	18C346P044	18C346P044	18C346P044	5	2
Multifamily	18C346P050	18C346P050	18C346P050_1	5	5
Multifamily	18C342P091	18C342P091	18C342P091	5	4.5
Multifamily	18C346P038	18C346P038	18C346P038_2	5	3
Multifamily	18B168P001	18B168P001	18B168P001	5	2.5
Multifamily	18C342P003	18C342P003	18C342P003	5	6.5
Multifamily	18C342P008	18C342P008	18C342P008	5	3
Multifamily	18C342P077	18C342P077	18C342P077_1	5	3
Multifamily	18C343P097	18C343P097	18C343P097_2	5	4
Multifamily	18C343P025	18C343P025	18C343P025_2	5	6.5
Multifamily	18B168P036	18B168P036	18B168P036	5	3
Multifamily	18C343P065	18C343P065	18C343P065_1	5	5.5
Multifamily	18C343P061	18C343P061	18C343P061	5	3
Multifamily	18C343P056	18C343P056	18C343P056_1	5	4.5
Multifamily	18C343P056	18C343P056	18C343P056_2	5	4
Multifamily	18C346P092	18C346P092	18C346P092_1	5	4
Multifamily	18C347P045	18C347P045	18C347P045_3	5	5.5
Multifamily	18B168P018	18B168P018	18B168P018_1	5	3
Multifamily	18C346P056	18C346P056	18C346P056	5	4
Multifamily	18C346P062	18C346P062	18C346P062_3	5	4
Multifamily	18C346P021	18C346P021	18C346P021	5	6
Multifamily	18C346P086	18C346P086	18C346P086_2	5	7.5
Multifamily	18B168P081	18B168P081	18B168P081	5	2.5
Multifamily	18B168P076	18B168P076	18B168P076	5	4
Multifamily	18C347P064	18C347P064	18C347P064_5	5	4
Multifamily	18C343P002	18C343P002	18C343P002	5	3
Multifamily	18B168P066	18B168P066	18B168P066	5	4
Multifamily	18C347P082	18C347P082	18C347P082	5	3.5
Multifamily	18C347P096	18C347P096	18C347P096	5	5
Multifamily	18C343P015	18C343P015	18C343P015_2	5	2.5
Multifamily	18C342P066	18C342P066	18C342P066	5	3.5
Multifamily	18C346P032	18C346P032	18C346P032_3	5	3.5
Multifamily	18C346P026	18C346P026	18C346P026_4	5	4
Multifamily	18C346P029	18C346P029	18C346P029_1	5	6
Multifamily	18C346P040	18C346P040	18C346P040_2	5	4
Multifamily	18C346P040	18C346P040	18C346P040_3	5	4.5
Multifamily	18C346P039	18C346P039	18C346P039_4	5	3.5
Multifamily	18C343P099	18C343P099	18C343P099_1	5	4
Multifamily	18C343P021	18C343P021	18C343P021	5	5.5
Multifamily	18B168P047	18B168P047	18B168P047	5	1.5
Multifamily	18C343P072	18C343P072	18C343P072_1	5	4.5
Multifamily	18C343P061	18C343P061	18C343P061_1	5	5.5
Multifamily	18C343P056	18C343P056	18C343P056_3	5	4
Multifamily	18C346P093	18C346P093	18C346P093	5	4
Multifamily	18C347P041	18C347P041	18C347P041	5	3
Multifamily	18C347P042	18C347P042	18C347P042_2	5	4
Multifamily	18C347P032	18C347P032	18C347P032_1	5	3.5
Multifamily	18B168P018	18B168P018	18B168P018_2	5	2
Multifamily	18C346P066	18C346P066	18C346P066_1	5	4
Multifamily	18C346P068	18C346P068	18C346P068_3	5	4
Multifamily	18C346P004	18C346P004	18C346P004_2	5	3.5
Multifamily	18C346P082	18C346P082	18C346P082	5	4.5
Multifamily	18B168P069	18B168P069	18B168P069	5	3
Multifamily	18C347P075	18C347P075	18C347P075	5	5
Multifamily	18C347P057	18C347P057	18C347P057	5	3.5
Multifamily	18C342P059	18C342P059	18C342P059	5	2
Multifamily	18B168P023	18B168P023	18B168P023	5	2
Multifamily	08C123P001	UCD_Royal_Royce	08C123P001_7	7	13
Multifamily	05C197P002	05C197P002	05C197P002_1	5	2
Multifamily	08C123P001	UCD_Royal_Royce	08C123P001	8	16.5
Multifamily	18C343P081	18C343P081	18C343P081	5	2.5
Multifamily	18C343P076	18C343P076	18C343P076_3	5	3.5
Multifamily	18C343P079	18C343P079	18C343P079	5	6.5
Multifamily	18C342P050	18C342P050	18C342P050	5	2.5
Multifamily	18C342P040	18C342P040	18C342P040	5	6.5
Multifamily	18C347P097	18C347P097	18C347P097	5	3
Multifamily	18C343P016	18C343P016	18C343P016	5	4
Multifamily	18C346P033	18C346P033	18C346P033	5	3
Multifamily	18C343P054	18C343P054	18C343P054	5	2.5
Multifamily	18C346P050	18C346P050	18C346P050_2	5	3
Multifamily	18C342P089	18C342P089	18C342P089_3	5	6
Multifamily	18C342P009	18C342P009	18C342P009	5	4
Multifamily	18C343P041	18C343P041	18C343P041	5	7.5
Multifamily	18B168P004	18B168P004	18B168P004	5	2.5
Multifamily	18C342P008	18C342P008	18C342P008_1	5	2.5
Multifamily	18C343P022	18C343P022	18C343P022_2	5	5
Multifamily	18C343P026	18C343P026	18C343P026_1	5	3.5
Multifamily	18C346P093	18C346P093	18C346P093_1	5	6
Multifamily	18C347P042	18C347P042	18C347P042_3	5	2.5
Multifamily	18C347P028	18C347P028	18C347P028_1	5	3.5
Multifamily	18C347P015	18C347P015	18C347P015	5	3.5
Multifamily	18C346P069	18C346P069	18C346P069_1	5	5
Multifamily	18C346P071	18C346P071	18C346P071	5	3.5
Multifamily	18C346P072	18C346P072	18C346P072	5	5
Multifamily	18C346P011	18C346P011	18C346P011	5	4
Multifamily	18C347P070	18C347P070	18C347P070_3	5	3
Multifamily	18C347P059	18C347P059	18C347P059	5	3
Multifamily	18C347P049	18C347P049	18C347P049_1	5	5
Multifamily	18C342P056	18C342P056	18C342P056	5	3
Multifamily	18C342P059	18C342P059	18C342P059_1	5	5
Multifamily	18C342P058	18C342P058	18C342P058	5	3
Multifamily	18C342P100	18C342P100	18C342P100_1	5	4.5
Multifamily	08C123P001	UCD_Royal_Royce	08C123P001_1	8	17.5
Multifamily	18C343P011	18C343P011	18C343P011_1	5	4
Multifamily	18C342P082	18C342P082	18C342P082_1	5	3
Multifamily	18C342P018	18C342P018	18C342P018	5	4
Multifamily	18C342P011	18C342P011	18C342P011	5	4
Multifamily	18C343P096	18C343P096	18C343P096	5	4.5
Multifamily	18C343P066	18C343P066	18C343P066_2	5	4.5
Multifamily	18C343P065	18C343P065	18C343P065_2	5	4
Multifamily	18C343P071	18C343P071	18C343P071_1	5	4
Multifamily	18C343P071	18C343P071	18C343P071_2	5	5.5
Multifamily	18C343P056	18C343P056	18C343P056_4	5	3
Multifamily	18C343P056	18C343P056	18C343P056_5	5	4
Multifamily	18C343P057	18C343P057	18C343P057_2	5	4.5
Multifamily	18C347P029	18C347P029	18C347P029_1	5	3
Multifamily	18C347P023	18C347P023	18C347P023	5	3
Multifamily	18C347P022	18C347P022	18C347P022_1	5	3
Multifamily	18C347P022	18C347P022	18C347P022_2	5	3
Multifamily	18C347P016	18C347P016	18C347P016	5	3
Multifamily	18C347P015	18C347P015	18C347P015_1	5	4
Multifamily	18C346P069	18C346P069	18C346P069_2	5	3
Multifamily	18C346P075	18C346P075	18C346P075_1	5	3
Multifamily	18C346P004	18C346P004	18C346P004_3	5	4
Multifamily	18C346P016	18C346P016	18C346P016_3	5	3
Multifamily	18B168P087	18B168P087	18B168P087	5	3
Multifamily	18B168P087	18B168P087	18B168P087_1	5	2.5
Multifamily	18B168P074	18B168P074	18B168P074	5	3
Multifamily	18C347P072	18C347P072	18C347P072_1	5	3.5
Multifamily	18C347P056	18C347P056	18C347P056	5	4
Multifamily	18C347P053	18C347P053	18C347P053	5	6
Multifamily	05C197P002	05C197P002	05C197P002_2	5	2
Multifamily	18C343P077	18C343P077	18C343P077	5	4.5
Multifamily	18C347P082	18C347P082	18C347P082_1	5	2.5
Multifamily	18C347P086	18C347P086	18C347P086	5	6.5
Multifamily	18C342P037	18C342P037	18C342P037	5	5
Multifamily	18C342P034	18C342P034	18C342P034	5	3
Multifamily	18C342P035	18C342P035	18C342P035	5	2.5
Multifamily	18C346P025	18C346P025	18C346P025_2	5	2
Multifamily	18C346P032	18C346P032	18C346P032_4	5	3.5
Multifamily	18C346P026	18C346P026	18C346P026_5	5	4
Multifamily	18C343P046	18C343P046	18C343P046	5	2
Multifamily	18C346P047	18C346P047	18C346P047	5	3.5
Multifamily	18C346P049	18C346P049	18C346P049_1	5	3.5
Multifamily	18C343P043	18C343P043	18C343P043_2	5	3
Multifamily	18C346P040	18C346P040	18C346P040_4	5	2.5
Multifamily	18C347P010	18C347P010	18C347P010	5	4.5
Multifamily	18C342P080	18C342P080	18C342P080_1	5	3.5
Multifamily	18C343P095	18C343P095	18C343P095	5	5.5
Multifamily	18C343P032	18C343P032	18C343P032_1	5	3
Multifamily	18C343P021	18C343P021	18C343P021_1	5	3
Multifamily	18C343P068	18C343P068	18C343P068	5	4
Multifamily	18C343P067	18C343P067	18C343P067_5	5	4
Multifamily	18C343P070	18C343P070	18C343P070_1	5	5.5
Multifamily	18C343P070	18C343P070	18C343P070_2	5	6.5
Multifamily	18C343P062	18C343P062	18C343P062	5	6.5
Multifamily	18C343P061	18C343P061	18C343P061_2	5	4.5
Multifamily	18C343P056	18C343P056	18C343P056_6	5	5
Multifamily	18C343P060	18C343P060	18C343P060	5	4
Multifamily	18C347P042	18C347P042	18C347P042_4	5	2.5
Multifamily	18C347P030	18C347P030	18C347P030	5	5
Multifamily	18B168P011	18B168P011	18B168P011_1	5	3
Multifamily	18C346P060	18C346P060	18C346P060	5	4
Multifamily	18C346P069	18C346P069	18C346P069_3	5	5.5
Multifamily	18C346P070	18C346P070	18C346P070_2	5	3.5
Multifamily	18C346P068	18C346P068	18C346P068_4	5	4
Multifamily	18C346P068	18C346P068	18C346P068_5	5	4
Multifamily	18C346P077	18C346P077	18C346P077_3	5	3.5
Multifamily	18C346P072	18C346P072	18C346P072_1	5	8.5
Multifamily	18C346P005	18C346P005	18C346P005_2	5	6.5
Multifamily	18C346P004	18C346P004	18C346P004_4	5	4
Multifamily	18C346P086	18C346P086	18C346P086_3	5	9
Multifamily	18C347P065	18C347P065	18C347P065_1	5	2.5
Multifamily	18C347P068	18C347P068	18C347P068_1	5	5
Multifamily	18C347P070	18C347P070	18C347P070_4	5	4.5
Multifamily	18C347P059	18C347P059	18C347P059_1	5	4
Multifamily	18C347P057	18C347P057	18C347P057_1	5	3
Multifamily	18B168P028	18B168P028	18B168P028	5	4
Multifamily	08C123P001	UCD_Royal_Royce	08C123P001_2	8	17.5
Multifamily	18C343P081	18C343P081	18C343P081_1	5	4
Multifamily	18C342P046	18C342P046	18C342P046	5	4
Multifamily	18C342P040	18C342P040	18C342P040_1	5	5
Multifamily	18C343P015	18C343P015	18C343P015_3	5	2.5
Multifamily	18C342P086	18C342P086	18C342P086	5	7
Multifamily	18C342P088	18C342P088	18C342P088	5	8.5
Multifamily	18C342P091	18C342P091	18C342P091_1	5	3
Multifamily	18C343P039	18C343P039	18C343P039	5	3.5
Multifamily	18C343P044	18C343P044	18C343P044_1	5	3
Multifamily	18C346P039	18C346P039	18C346P039_5	5	2.5
Multifamily	18C346P039	18C346P039	18C346P039_6	5	3.5
Multifamily	18C343P099	18C343P099	18C343P099_2	5	4.5
Multifamily	18C343P098	18C343P098	18C343P098_1	5	4
Multifamily	18C343P097	18C343P097	18C343P097_3	5	4
Multifamily	18C343P097	18C343P097	18C343P097_4	5	3.5
Multifamily	18B168P045	18B168P045	18B168P045	5	3.5
Multifamily	18C343P072	18C343P072	18C343P072_2	5	4
Multifamily	18C347P031	18C347P031	18C347P031	5	4
Multifamily	18C347P031	18C347P031	18C347P031_1	5	3.5
Multifamily	18C347P037	18C347P037	18C347P037	5	4
Multifamily	18C347P029	18C347P029	18C347P029_2	5	2
Multifamily	18C347P023	18C347P023	18C347P023_1	5	4
Multifamily	18C347P021	18C347P021	18C347P021	5	4
Multifamily	18C346P086	18C346P086	18C346P086_4	5	3.5
Multifamily	18C346P081	18C346P081	18C346P081_1	5	4
Multifamily	18B168P076	18B168P076	18B168P076_1	5	2.5
Multifamily	18C347P075	18C347P075	18C347P075_1	5	4
Multifamily	18B168P061	18B168P061	18B168P061	5	3.5
Multifamily	08C123P001	UCD_Royal_Royce	08C123P001_3	8	17.5
Multifamily	18C343P079	18C343P079	18C343P079_1	5	7.5
Multifamily	18C342P038	18C342P038	18C342P038_1	5	3.5
Multifamily	18C343P018	18C343P018	18C343P018	5	2.5
Multifamily	18C343P016	18C343P016	18C343P016_1	5	4
[truncated: 29,967 more rows]

## Sheet: External Mycelium (dpi)
Population	Accession	Alias	Unique_Subsample	External_Mycelium
Multifamily	PI551862	Earlimiss	Earlimiss	7
Multifamily	PI551862	Earlimiss	Earlimiss_1	6
Multifamily	PI551862	Earlimiss	Earlimiss_2	6
Multifamily	PI551862	Earlimiss	Earlimiss_3	6
Multifamily	PI551862	Earlimiss	Earlimiss_4	6
Multifamily	PI551862	Earlimiss	Earlimiss_5	6
Multifamily	PI551632	Madame_Moutot	Madame_Moutot	7
Multifamily	PI551632	Madame_Moutot	Madame_Moutot_1	7
Multifamily	PI551632	Madame_Moutot	Madame_Moutot_2	8
Multifamily	PI551632	Madame_Moutot	Madame_Moutot_3	8
Multifamily	PI551632	Madame_Moutot	Madame_Moutot_4	7.5
Multifamily	PI551632	Madame_Moutot	Madame_Moutot_5	7
Multifamily	PI551632	Madame_Moutot	Madame_Moutot_6	7
Multifamily	PI551632	Madame_Moutot	Madame_Moutot_7	7
Multifamily	PI551632	Madame_Moutot	Madame_Moutot_8	7
Multifamily	PI551632	Madame_Moutot	Madame_Moutot_9	7
Multifamily	PI551632	Madame_Moutot	Madame_Moutot_10	7
Multifamily	PI551632	Madame_Moutot	Madame_Moutot_11	7
Multifamily	PI551422	Primella	Primella	6
Multifamily	PI551422	Primella	Primella_1	6
Multifamily	PI551422	Primella	Primella_2	6
Multifamily	PI551422	Primella	Primella_3	6
Multifamily	PI551481	Tangi	Tangi	6
Multifamily	08C123P001	UCD_Royal_Royce	08C123P001	7.5
Multifamily	08C123P001	UCD_Royal_Royce	08C123P001_1	7.5
Multifamily	08C123P001	UCD_Royal_Royce	08C123P001_2	7.5
Multifamily	08C123P001	UCD_Royal_Royce	08C123P001_3	8
Multifamily	08C123P001	UCD_Royal_Royce	08C123P001_4	8.5
Multifamily	08C123P001	UCD_Royal_Royce	08C123P001_5	7.5
Multifamily	08C123P001	UCD_Royal_Royce	08C123P001_6	8
Multifamily	08C123P001	UCD_Royal_Royce	08C123P001_7	7.5
Multifamily	18B168C010	18B168C010	18B168C010	10
Multifamily	18C346C006	18C346C006	18C346C006	NA
Multifamily	18C343C033	18C343C033	18C343C033	9.5
Multifamily	18C346C006	18C346C006	18C346C006_1	9.5
Multifamily	18C343C012	18C343C012	18C343C012	11
Multifamily	18C346C012	18C346C012	18C346C012	11
Multifamily	18C346C005	18C346C005	18C346C005	9
Multifamily	18C346C024	18C346C024	18C346C024	11.5
Multifamily	18C343C004	18C343C004	18C343C004	9
Multifamily	18C346C005	18C346C005	18C346C005_1	8
Multifamily	18C346C032	18C346C032	18C346C032	9.5
Multifamily	18C346C024	18C346C024	18C346C024_1	11.5
Multifamily	18C347C058	18C347C058	18C347C058	9
Multifamily	18C346C032	18C346C032	18C346C032_1	11.5
Multifamily	18B168C006	18B168C006	18B168C006	10
Multifamily	18B168C010	18B168C010	18B168C010_1	10
Multifamily	18C343C015	18C343C015	18C343C015	8.5
Multifamily	18C343C015	18C343C015	18C343C015_1	NA
Multifamily	18C343C040	18C343C040	18C343C040	9.5
Multifamily	18C346C039	18C346C039	18C346C039	10.5
Multifamily	18C343C019	18C343C019	18C343C019	8.5
Multifamily	18C346C086	18C346C086	18C346C086	9.5
Multifamily	18C342C032	18C342C032	18C342C032	8
Multifamily	18C346C026	18C346C026	18C346C026	12
Multifamily	18C347C011	18C347C011	18C347C011	6
Multifamily	18C346C010	18C346C010	18C346C010	9.5
Multifamily	18C346C003	18C346C003	18C346C003	10
Multifamily	18C347C076	18C347C076	18C347C076	10
Multifamily	18C346C037	18C346C037	18C346C037	9.5
Multifamily	18C342C075	18C342C075	18C342C075	9.5
Multifamily	18C346C006	18C346C006	18C346C006_2	9.5
Multifamily	18C346C010	18C346C010	18C346C010_1	8.5
Multifamily	18C346C016	18C346C016	18C346C016	9
Multifamily	18C346C025	18C346C025	18C346C025	12.5
Multifamily	18C342C089	18C342C089	18C342C089	8
Multifamily	18C343C040	18C343C040	18C343C040_1	9.5
Multifamily	18C347C045	18C347C045	18C347C045	8
Multifamily	18C347C022	18C347C022	18C347C022	9
Multifamily	18C346C070	18C346C070	18C346C070	9
Multifamily	18C346C074	18C346C074	18C346C074	9.5
Multifamily	18C347C070	18C347C070	18C347C070	9
Multifamily	18C343C042	18C343C042	18C343C042	7.5
Multifamily	18C347C036	18C347C036	18C347C036	9.5
Multifamily	18C347C032	18C347C032	18C347C032	7.5
Multifamily	18C346C066	18C346C066	18C346C066	8
Multifamily	18C342C071	18C342C071	18C342C071	8.5
Multifamily	18C343C044	18C343C044	18C343C044	7
Multifamily	18C343C069	18C343C069	18C343C069	12
Multifamily	18C346C024	18C346C024	18C346C024_2	7
Multifamily	18C347C058	18C347C058	18C347C058_1	8.5
Multifamily	18C346C034	18C346C034	18C346C034	9
Multifamily	18C346C012	18C346C012	18C346C012_1	10.5
Multifamily	18C346C034	18C346C034	18C346C034_1	8
Multifamily	18C343C067	18C343C067	18C343C067	9.5
Multifamily	18B168C011	18B168C011	18B168C011	8.5
Multifamily	18C346C068	18C346C068	18C346C068	8
Multifamily	18C342C068	18C342C068	18C342C068	8
Multifamily	18C342C047	18C342C047	18C342C047	10
Multifamily	18C342C062	18C342C062	18C342C062	8.5
Multifamily	18C346C034	18C346C034	18C346C034_2	7
Multifamily	18C342C024	18C342C024	18C342C024	7.5
Multifamily	18C346C045	18C346C045	18C346C045	9
Multifamily	18C342C015	18C342C015	18C342C015	8.5
Multifamily	18C343C040	18C343C040	18C343C040_2	9.5
Multifamily	18C343C022	18C343C022	18C343C022	7.5
Multifamily	18C343C071	18C343C071	18C343C071	9.5
Multifamily	18C343C072	18C343C072	18C343C072	8
Multifamily	18C347C042	18C347C042	18C347C042	9
Multifamily	18C342C074	18C342C074	18C342C074	7
Multifamily	18C346C025	18C346C025	18C346C025_1	10
Multifamily	18C346C010	18C346C010	18C346C010_2	9
Multifamily	18C346C016	18C346C016	18C346C016_1	9.5
Multifamily	18C346C081	18C346C081	18C346C081	6
Multifamily	18C347C068	18C347C068	18C347C068	11.5
Multifamily	18C347C070	18C347C070	18C347C070_1	7.5
Multifamily	18C342C074	18C342C074	18C342C074_1	8
Multifamily	18C343C040	18C343C040	18C343C040_3	9.5
Multifamily	18C346C039	18C346C039	18C346C039_1	8.5
Multifamily	18C347C007	18C347C007	18C347C007	9
Multifamily	18C343C025	18C343C025	18C343C025	8.5
Multifamily	18C346C092	18C346C092	18C346C092	9.5
Multifamily	18C346C003	18C346C003	18C346C003_1	9
Multifamily	18C347C058	18C347C058	18C347C058_2	8.5
Multifamily	18C342C073	18C342C073	18C342C073	8.5
Multifamily	18C342C070	18C342C070	18C342C070	7
Multifamily	18C347C088	18C347C088	18C347C088	7
Multifamily	18C342C041	18C342C041	18C342C041	8
Multifamily	18C346C034	18C346C034	18C346C034_3	8.5
Multifamily	18C342C025	18C342C025	18C342C025	8
Multifamily	18C342C089	18C342C089	18C342C089_1	8
Multifamily	18C346C038	18C346C038	18C346C038	9
Multifamily	18C342C075	18C342C075	18C342C075_1	8
Multifamily	18C343C033	18C343C033	18C343C033_1	8.5
Multifamily	18C343C019	18C343C019	18C343C019_1	8
Multifamily	18C343C069	18C343C069	18C343C069_1	8.5
Multifamily	18C343C056	18C343C056	18C343C056	11.5
Multifamily	18C347C039	18C347C039	18C347C039	7.5
Multifamily	18B168C017	18B168C017	18B168C017	9.5
Multifamily	18C346C062	18C346C062	18C346C062	8.5
Multifamily	18C346C077	18C346C077	18C346C077	12.5
Multifamily	18C346C010	18C346C010	18C346C010_3	9.5
Multifamily	18C346C079	18C346C079	18C346C079	10.5
Multifamily	18C342C054	18C342C054	18C342C054	8
Multifamily	18C343C005	18C343C005	18C343C005	7.5
Multifamily	18C343C082	18C343C082	18C343C082	11
Multifamily	18C347C088	18C347C088	18C347C088_1	7
Multifamily	18C342C038	18C342C038	18C342C038	9
Multifamily	18C347C095	18C347C095	18C347C095	9
Multifamily	18C343C052	18C343C052	18C343C052	9
Multifamily	18C342C013	18C342C013	18C342C013	7
Multifamily	18C346C039	18C346C039	18C346C039_2	8.5
Multifamily	18C342C076	18C342C076	18C342C076	8.5
Multifamily	18C342C078	18C342C078	18C342C078	7
Multifamily	18C343C030	18C343C030	18C343C030	10
Multifamily	18C343C028	18C343C028	18C343C028	7
Multifamily	18C343C065	18C343C065	18C343C065	10.5
Multifamily	18C343C070	18C343C070	18C343C070	9
Multifamily	18C343C057	18C343C057	18C343C057	6
Multifamily	18B168C018	18B168C018	18B168C018	8
Multifamily	18C346C053	18C346C053	18C346C053	8.5
Multifamily	18C346C070	18C346C070	18C346C070_1	8.5
Multifamily	18C346C075	18C346C075	18C346C075	9.5
Multifamily	18C346C010	18C346C010	18C346C010_4	9.5
Multifamily	18C346C004	18C346C004	18C346C004	9
Multifamily	18C346C016	18C346C016	18C346C016_2	9
Multifamily	18B168C075	18B168C075	18B168C075	10.5
Multifamily	18C347C047	18C347C047	18C347C047	8.5
Multifamily	18C342C070	18C342C070	18C342C070_1	7
Multifamily	18C342C070	18C342C070	18C342C070_2	8
Multifamily	18C343C080	18C343C080	18C343C080	9.5
Multifamily	18C342C062	18C342C062	18C342C062_1	7
Multifamily	18C342C028	18C342C028	18C342C028	8
Multifamily	18C342C019	18C342C019	18C342C019	8
Multifamily	18C343C038	18C343C038	18C343C038	7
Multifamily	18C343C040	18C343C040	18C343C040_4	8.5
Multifamily	18C346C041	18C346C041	18C346C041	6
Multifamily	18C343C032	18C343C032	18C343C032	8.5
Multifamily	18C343C025	18C343C025	18C343C025_1	9.5
Multifamily	18C343C067	18C343C067	18C343C067_1	10
Multifamily	18C347C029	18C347C029	18C347C029	9
Multifamily	18C347C024	18C347C024	18C347C024	7
Multifamily	18C346C077	18C346C077	18C346C077_1	10.5
Multifamily	18C346C010	18C346C010	18C346C010_5	8.5
Multifamily	18C346C004	18C346C004	18C346C004_1	8
Multifamily	18C347C046	18C347C046	18C347C046	8
Multifamily	18C342C070	18C342C070	18C342C070_3	7
Multifamily	18C343C009	18C343C009	18C343C009	8
Multifamily	18C346C026	18C346C026	18C346C026_1	11.5
Multifamily	18C346C045	18C346C045	18C346C045_1	8.5
Multifamily	18C346C049	18C346C049	18C346C049	7
Multifamily	18C342C090	18C342C090	18C342C090	8.5
Multifamily	18C342C089	18C342C089	18C342C089_2	6
Multifamily	18C346C043	18C346C043	18C346C043	11
Multifamily	18C342C075	18C342C075	18C342C075_2	7
Multifamily	18C343C028	18C343C028	18C343C028_1	8.5
Multifamily	18C343C026	18C343C026	18C343C026	7
Multifamily	18C347C064	18C347C064	18C347C064	8.5
Multifamily	18C342C067	18C342C067	18C342C067	6
Multifamily	18C346C026	18C346C026	18C346C026_2	9.5
Multifamily	18C342C019	18C342C019	18C342C019_1	9
Multifamily	18C342C012	18C342C012	18C342C012	9.5
Multifamily	18C343C043	18C343C043	18C343C043	7
Multifamily	18C346C040	18C346C040	18C346C040	8.5
Multifamily	18C343C098	18C343C098	18C343C098	9.5
Multifamily	18C343C097	18C343C097	18C343C097	10.5
Multifamily	18C343C034	18C343C034	18C343C034	8.5
Multifamily	18C343C028	18C343C028	18C343C028_2	7
Multifamily	18C343C067	18C343C067	18C343C067_2	9.5
Multifamily	18C346C097	18C346C097	18C346C097	8.5
Multifamily	18C347C040	18C347C040	18C347C040	8.5
Multifamily	18C346C055	18C346C055	18C346C055	10
Multifamily	18C346C064	18C346C064	18C346C064	9.5
Multifamily	18C346C068	18C346C068	18C346C068_1	8
Multifamily	18C346C067	18C346C067	18C346C067	9.5
Multifamily	18C346C086	18C346C086	18C346C086_1	8.5
Multifamily	18C346C079	18C346C079	18C346C079_1	9.5
Multifamily	18C347C064	18C347C064	18C347C064_1	7.5
Multifamily	18C347C064	18C347C064	18C347C064_2	6
Multifamily	18C347C065	18C347C065	18C347C065	10.5
Multifamily	18C347C070	18C347C070	18C347C070_2	9
Multifamily	18C347C058	18C347C058	18C347C058_3	9.5
Multifamily	18C347C048	18C347C048	18C347C048	6
Multifamily	18C347C049	18C347C049	18C347C049	7
Multifamily	18C343C009	18C343C009	18C343C009_1	7.5
Multifamily	18C343C088	18C343C088	18C343C088	7.5
Multifamily	18C343C080	18C343C080	18C343C080_1	9.5
Multifamily	18C347C091	18C347C091	18C347C091	7
Multifamily	18C343C011	18C343C011	18C343C011	9
Multifamily	18C346C034	18C346C034	18C346C034_4	7.5
Multifamily	18C346C032	18C346C032	18C346C032_2	10.5
Multifamily	18C342C025	18C342C025	18C342C025_1	6
Multifamily	18C342C014	18C342C014	18C342C014	7
Multifamily	18C343C038	18C343C038	18C343C038_1	7
Multifamily	18C343C043	18C343C043	18C343C043_1	7
Multifamily	18C346C036	18C346C036	18C346C036	7.5
Multifamily	18C346C040	18C346C040	18C346C040_1	9.5
Multifamily	18C346C041	18C346C041	18C346C041_1	8.5
Multifamily	18C346C038	18C346C038	18C346C038_1	7.5
Multifamily	18C346C037	18C346C037	18C346C037_1	7
Multifamily	18C346C039	18C346C039	18C346C039_3	9.5
Multifamily	18C342C002	18C342C002	18C342C002	7.5
Multifamily	18C342C082	18C342C082	18C342C082	7
Multifamily	18C342C077	18C342C077	18C342C077	7.5
Multifamily	18B168C039	18B168C039	18B168C039	9.5
Multifamily	18B168C031	18B168C031	18B168C031	8.5
Multifamily	18C343C066	18C343C066	18C343C066	8.5
Multifamily	18C347C036	18C347C036	18C347C036_1	7.5
Multifamily	18C347C027	18C347C027	18C347C027	7.5
Multifamily	18C347C024	18C347C024	18C347C024_1	7
Multifamily	18C346C077	18C346C077	18C346C077_2	NA
Multifamily	18B168C070	18B168C070	18B168C070	9.5
Multifamily	18C347C080	18C347C080	18C347C080	8
Multifamily	18C343C076	18C343C076	18C343C076	8.5
Multifamily	18C342C065	18C342C065	18C342C065	7.5
Multifamily	18C342C031	18C342C031	18C342C031	8.5
Multifamily	18C343C053	18C343C053	18C343C053	11
Multifamily	18C343C097	18C343C097	18C343C097_1	10.5
Multifamily	18C343C022	18C343C022	18C343C022_1	9.5
Multifamily	18C343C066	18C343C066	18C343C066_1	10.5
Multifamily	18C347C042	18C347C042	18C347C042_1	8.5
Multifamily	18C347C045	18C347C045	18C347C045_1	8
Multifamily	18C346C069	18C346C069	18C346C069	8.5
Multifamily	18C346C022	18C346C022	18C346C022	9.5
Multifamily	18C346C012	18C346C012	18C346C012_2	10.5
Multifamily	18C346C089	18C346C089	18C346C089	8
Multifamily	18C346C079	18C346C079	18C346C079_2	NA
Multifamily	18B168C079	18B168C079	18B168C079	7.5
Multifamily	18C347C072	18C347C072	18C347C072	7.5
Multifamily	18C347C069	18C347C069	18C347C069	7
Multifamily	18C347C063	18C347C063	18C347C063	7.5
Multifamily	18C347C048	18C347C048	18C347C048_1	6
Multifamily	18C347C091	18C347C091	18C347C091_1	7
Multifamily	18C347C087	18C347C087	18C347C087	6
Multifamily	18C342C033	18C342C033	18C342C033	8.5
Multifamily	18C346C026	18C346C026	18C346C026_3	11
Multifamily	18C346C050	18C346C050	18C346C050	8.5
Multifamily	18C342C007	18C342C007	18C342C007	7.5
Multifamily	18C342C080	18C342C080	18C342C080	7.5
Multifamily	18C343C099	18C343C099	18C343C099	7.5
Multifamily	18C343C037	18C343C037	18C343C037	8
Multifamily	18C343C029	18C343C029	18C343C029	8
Multifamily	18C343C067	18C343C067	18C343C067_3	8
Multifamily	18C343C069	18C343C069	18C343C069_2	9.5
Multifamily	18C343C057	18C343C057	18C343C057_1	8.5
Multifamily	18C347C045	18C347C045	18C347C045_2	7
Multifamily	18C346C053	18C346C053	18C346C053_1	8.5
Multifamily	18C346C062	18C346C062	18C346C062_1	8
Multifamily	18C346C068	18C346C068	18C346C068_2	7
Multifamily	18C346C024	18C346C024	18C346C024_3	11.5
Multifamily	18C346C023	18C346C023	18C346C023	11
Multifamily	18C347C064	18C347C064	18C347C064_3	7
Multifamily	18C347C060	18C347C060	18C347C060	7
Multifamily	18C346C041	18C346C041	18C346C041_2	9.5
Multifamily	18B168C041	18B168C041	18B168C041	9.5
Multifamily	18C343C067	18C343C067	18C343C067_4	8.5
Multifamily	18C343C069	18C343C069	18C343C069_3	8
Multifamily	18C346C099	18C346C099	18C346C099	9.5
Multifamily	18C346C099	18C346C099	18C346C099_1	9
Multifamily	18C347C028	18C347C028	18C347C028	7.5
Multifamily	18C347C024	18C347C024	18C347C024_2	7
Multifamily	18C347C018	18C347C018	18C347C018	9
Multifamily	18C346C062	18C346C062	18C346C062_2	8.5
Multifamily	18C347C064	18C347C064	18C347C064_4	7
Multifamily	18C347C048	18C347C048	18C347C048_2	6
Multifamily	18C347C048	18C347C048	18C347C048_3	6
Multifamily	18C343C008	18C343C008	18C343C008	7
Multifamily	18C342C100	18C342C100	18C342C100	7
Multifamily	18C342C099	18C342C099	18C342C099	6
Multifamily	05C197P002	05C197P002	05C197P002	8.5
Multifamily	18C343C089	18C343C089	18C343C089	10.5
Multifamily	18C343C076	18C343C076	18C343C076_1	9.5
Multifamily	18C343C076	18C343C076	18C343C076_2	8
Multifamily	18C346C029	18C346C029	18C346C029	10.5
Multifamily	18C343C052	18C343C052	18C343C052_1	7
Multifamily	18C343C053	18C343C053	18C343C053_1	7
Multifamily	18C346C046	18C346C046	18C346C046	7.5
Multifamily	18C346C045	18C346C045	18C346C045_2	7.5
Multifamily	18C346C044	18C346C044	18C346C044	8.5
Multifamily	18C346C050	18C346C050	18C346C050_1	7
Multifamily	18C342C091	18C342C091	18C342C091	7
Multifamily	18C346C038	18C346C038	18C346C038_2	9
Multifamily	18B168C001	18B168C001	18B168C001	7
Multifamily	18C342C003	18C342C003	18C342C003	7
Multifamily	18C342C008	18C342C008	18C342C008	7.5
Multifamily	18C342C077	18C342C077	18C342C077_1	7.5
Multifamily	18C343C097	18C343C097	18C343C097_2	10.5
Multifamily	18C343C025	18C343C025	18C343C025_2	7
Multifamily	18B168C036	18B168C036	18B168C036	8.5
Multifamily	18C343C065	18C343C065	18C343C065_1	10.5
Multifamily	18C343C061	18C343C061	18C343C061	10
Multifamily	18C343C056	18C343C056	18C343C056_1	10
Multifamily	18C343C056	18C343C056	18C343C056_2	10
Multifamily	18C346C092	18C346C092	18C346C092_1	7.5
Multifamily	18C347C045	18C347C045	18C347C045_3	6
Multifamily	18B168C018	18B168C018	18B168C018_1	7
Multifamily	18C346C056	18C346C056	18C346C056	7.5
Multifamily	18C346C062	18C346C062	18C346C062_3	7
Multifamily	18C346C021	18C346C021	18C346C021	7.5
Multifamily	18C346C086	18C346C086	18C346C086_2	8.5
Multifamily	18B168C081	18B168C081	18B168C081	9
Multifamily	18B168C076	18B168C076	18B168C076	7.5
Multifamily	18C347C064	18C347C064	18C347C064_5	8
Multifamily	18C343C002	18C343C002	18C343C002	9.5
Multifamily	18B168C066	18B168C066	18B168C066	9.5
Multifamily	18C347C082	18C347C082	18C347C082	6
Multifamily	18C347C096	18C347C096	18C347C096	7.5
Multifamily	18C343C015	18C343C015	18C343C015_2	9.5
Multifamily	18C342C066	18C342C066	18C342C066	7
Multifamily	18C346C032	18C346C032	18C346C032_3	11.5
Multifamily	18C346C026	18C346C026	18C346C026_4	8.5
Multifamily	18C346C029	18C346C029	18C346C029_1	9.5
Multifamily	18C346C040	18C346C040	18C346C040_2	8
Multifamily	18C346C040	18C346C040	18C346C040_3	9.5
Multifamily	18C346C039	18C346C039	18C346C039_4	9.5
Multifamily	18C343C099	18C343C099	18C343C099_1	7
Multifamily	18C343C021	18C343C021	18C343C021	7
Multifamily	18B168C047	18B168C047	18B168C047	8.5
Multifamily	18C343C072	18C343C072	18C343C072_1	7.5
Multifamily	18C343C061	18C343C061	18C343C061_1	8.5
Multifamily	18C343C056	18C343C056	18C343C056_3	11.5
Multifamily	18C346C093	18C346C093	18C346C093	7
Multifamily	18C347C041	18C347C041	18C347C041	9
Multifamily	18C347C042	18C347C042	18C347C042_2	9
Multifamily	18C347C032	18C347C032	18C347C032_1	6
Multifamily	18B168C018	18B168C018	18B168C018_2	9.5
Multifamily	18C346C066	18C346C066	18C346C066_1	8
Multifamily	18C346C068	18C346C068	18C346C068_3	8
Multifamily	18C346C004	18C346C004	18C346C004_2	7.5
Multifamily	18C346C082	18C346C082	18C346C082	8.5
Multifamily	18B168C069	18B168C069	18B168C069	8
Multifamily	18C347C075	18C347C075	18C347C075	10.5
Multifamily	18C347C057	18C347C057	18C347C057	8
Multifamily	18C342C059	18C342C059	18C342C059	8
Multifamily	18B168C023	18B168C023	18B168C023	8.5
Multifamily	05C197P002	05C197P002	05C197P002_1	6
Multifamily	18C343C081	18C343C081	18C343C081	9.5
Multifamily	18C343C076	18C343C076	18C343C076_3	8.5
Multifamily	18C343C079	18C343C079	18C343C079	6
Multifamily	18C342C050	18C342C050	18C342C050	8
Multifamily	18C342C040	18C342C040	18C342C040	7.5
Multifamily	18C347C097	18C347C097	18C347C097	6
Multifamily	18C343C016	18C343C016	18C343C016	9
Multifamily	18C346C033	18C346C033	18C346C033	9
Multifamily	18C343C054	18C343C054	18C343C054	8.5
Multifamily	18C346C050	18C346C050	18C346C050_2	8
Multifamily	18C342C089	18C342C089	18C342C089_3	6
Multifamily	18C342C009	18C342C009	18C342C009	7
Multifamily	18C343C041	18C343C041	18C343C041	7
Multifamily	18B168C004	18B168C004	18B168C004	7
Multifamily	18C342C008	18C342C008	18C342C008_1	7
Multifamily	18C343C022	18C343C022	18C343C022_2	7
Multifamily	18C343C026	18C343C026	18C343C026_1	7
Multifamily	18C346C093	18C346C093	18C346C093_1	7.5
Multifamily	18C347C042	18C347C042	18C347C042_3	8.5
Multifamily	18C347C028	18C347C028	18C347C028_1	7.5
Multifamily	18C347C015	18C347C015	18C347C015	7
Multifamily	18C346C069	18C346C069	18C346C069_1	8.5
Multifamily	18C346C071	18C346C071	18C346C071	8
Multifamily	18C346C072	18C346C072	18C346C072	9.5
Multifamily	18C346C011	18C346C011	18C346C011	8
Multifamily	18C347C070	18C347C070	18C347C070_3	8
Multifamily	18C347C059	18C347C059	18C347C059	7.5
Multifamily	18C347C049	18C347C049	18C347C049_1	6
Multifamily	18C342C056	18C342C056	18C342C056	7.5
Multifamily	18C342C059	18C342C059	18C342C059_1	8
Multifamily	18C342C058	18C342C058	18C342C058	7
Multifamily	18C342C100	18C342C100	18C342C100_1	6
Multifamily	18C343C011	18C343C011	18C343C011_1	8
Multifamily	18C342C082	18C342C082	18C342C082_1	8.5
Multifamily	18C342C018	18C342C018	18C342C018	7
Multifamily	18C342C011	18C342C011	18C342C011	8.5
Multifamily	18C343C096	18C343C096	18C343C096	11.5
Multifamily	18C343C066	18C343C066	18C343C066_2	8.5
Multifamily	18C343C065	18C343C065	18C343C065_2	11.5
Multifamily	18C343C071	18C343C071	18C343C071_1	9.5
Multifamily	18C343C071	18C343C071	18C343C071_2	8.5
Multifamily	18C343C056	18C343C056	18C343C056_4	10.5
Multifamily	18C343C056	18C343C056	18C343C056_5	8.5
Multifamily	18C343C057	18C343C057	18C343C057_2	8
Multifamily	18C347C029	18C347C029	18C347C029_1	8.5
Multifamily	18C347C023	18C347C023	18C347C023	7
Multifamily	18C347C022	18C347C022	18C347C022_1	9.5
Multifamily	18C347C022	18C347C022	18C347C022_2	7.5
Multifamily	18C347C016	18C347C016	18C347C016	8.5
Multifamily	18C347C015	18C347C015	18C347C015_1	8.5
Multifamily	18C346C069	18C346C069	18C346C069_2	9.5
Multifamily	18C346C075	18C346C075	18C346C075_1	10
Multifamily	18C346C004	18C346C004	18C346C004_3	8.5
Multifamily	18C346C016	18C346C016	18C346C016_3	7
Multifamily	18B168C087	18B168C087	18B168C087	9.5
Multifamily	18B168C087	18B168C087	18B168C087_1	10.5
Multifamily	18B168C074	18B168C074	18B168C074	8.5
Multifamily	18C347C072	18C347C072	18C347C072_1	7
Multifamily	18C347C056	18C347C056	18C347C056	8.5
Multifamily	18C347C053	18C347C053	18C347C053	6
Multifamily	05C197P002	05C197P002	05C197P002_2	5
Multifamily	18C343C077	18C343C077	18C343C077	8
Multifamily	18C347C082	18C347C082	18C347C082_1	8
Multifamily	18C347C086	18C347C086	18C347C086	6
Multifamily	18C342C037	18C342C037	18C342C037	7
Multifamily	18C342C034	18C342C034	18C342C034	7
Multifamily	18C342C035	18C342C035	18C342C035	8.5
Multifamily	18C346C025	18C346C025	18C346C025_2	8
Multifamily	18C346C032	18C346C032	18C346C032_4	9.5
Multifamily	18C346C026	18C346C026	18C346C026_5	9.5
Multifamily	18C343C046	18C343C046	18C343C046	8
Multifamily	18C346C047	18C346C047	18C346C047	7
Multifamily	18C346C049	18C346C049	18C346C049_1	7
Multifamily	18C343C043	18C343C043	18C343C043_2	7
Multifamily	18C346C040	18C346C040	18C346C040_4	7.5
Multifamily	18C347C010	18C347C010	18C347C010	7
Multifamily	18C342C080	18C342C080	18C342C080_1	7.5
Multifamily	18C343C095	18C343C095	18C343C095	7.5
Multifamily	18C343C032	18C343C032	18C343C032_1	8.5
Multifamily	18C343C021	18C343C021	18C343C021_1	8.5
Multifamily	18C343C068	18C343C068	18C343C068	7.5
Multifamily	18C343C067	18C343C067	18C343C067_5	7.5
Multifamily	18C343C070	18C343C070	18C343C070_1	8
Multifamily	18C343C070	18C343C070	18C343C070_2	8
Multifamily	18C343C062	18C343C062	18C343C062	9
Multifamily	18C343C061	18C343C061	18C343C061_2	9.5
Multifamily	18C343C056	18C343C056	18C343C056_6	10.5
Multifamily	18C343C060	18C343C060	18C343C060	10
Multifamily	18C347C042	18C347C042	18C347C042_4	8.5
Multifamily	18C347C030	18C347C030	18C347C030	7
Multifamily	18B168C011	18B168C011	18B168C011_1	8
Multifamily	18C346C060	18C346C060	18C346C060	7
Multifamily	18C346C069	18C346C069	18C346C069_3	9.5
Multifamily	18C346C070	18C346C070	18C346C070_2	8
Multifamily	18C346C068	18C346C068	18C346C068_4	7
Multifamily	18C346C068	18C346C068	18C346C068_5	7
Multifamily	18C346C077	18C346C077	18C346C077_3	11.5
Multifamily	18C346C072	18C346C072	18C346C072_1	10.5
Multifamily	18C346C005	18C346C005	18C346C005_2	7
Multifamily	18C346C004	18C346C004	18C346C004_4	9
Multifamily	18C346C086	18C346C086	18C346C086_3	7.5
Multifamily	18C347C065	18C347C065	18C347C065_1	8
Multifamily	18C347C068	18C347C068	18C347C068_1	8
Multifamily	18C347C070	18C347C070	18C347C070_4	9.5
Multifamily	18C347C059	18C347C059	18C347C059_1	8
Multifamily	18C347C057	18C347C057	18C347C057_1	7
Multifamily	18B168C028	18B168C028	18B168C028	9.5
Multifamily	18C343C081	18C343C081	18C343C081_1	9.5
Multifamily	18C342C046	18C342C046	18C342C046	7
Multifamily	18C342C040	18C342C040	18C342C040_1	7
Multifamily	18C343C015	18C343C015	18C343C015_3	6
Multifamily	18C342C086	18C342C086	18C342C086	8
Multifamily	18C342C088	18C342C088	18C342C088	7
Multifamily	18C342C091	18C342C091	18C342C091_1	7.5
Multifamily	18C343C039	18C343C039	18C343C039	8.5
Multifamily	18C343C044	18C343C044	18C343C044_1	7
Multifamily	18C346C039	18C346C039	18C346C039_5	8
Multifamily	18C346C039	18C346C039	18C346C039_6	9.5
Multifamily	18C343C099	18C343C099	18C343C099_2	7
Multifamily	18C343C098	18C343C098	18C343C098_1	8.5
Multifamily	18C343C097	18C343C097	18C343C097_3	11.5
Multifamily	18C343C097	18C343C097	18C343C097_4	9.5
Multifamily	18B168C045	18B168C045	18B168C045	8.5
Multifamily	18C343C072	18C343C072	18C343C072_2	9
Multifamily	18C347C031	18C347C031	18C347C031	7.5
Multifamily	18C347C031	18C347C031	18C347C031_1	8
Multifamily	18C347C037	18C347C037	18C347C037	7.5
Multifamily	18C347C029	18C347C029	18C347C029_2	9
Multifamily	18C347C023	18C347C023	18C347C023_1	7
Multifamily	18C347C021	18C347C021	18C347C021	7
Multifamily	18C346C086	18C346C086	18C346C086_4	7
Multifamily	18C346C081	18C346C081	18C346C081_1	6
Multifamily	18B168C076	18B168C076	18B168C076_1	7.5
Multifamily	18C347C075	18C347C075	18C347C075_1	7
Multifamily	18B168C061	18B168C061	18B168C061	10.5
Multifamily	18C343C079	18C343C079	18C343C079_1	6
Multifamily	18C342C038	18C342C038	18C342C038_1	7
Multifamily	18C343C018	18C343C018	18C343C018	9
Multifamily	18C343C016	18C343C016	18C343C016_1	8
Multifamily	18C342C027	18C342C027	18C342C027	7
Multifamily	18C343C054	18C343C054	18C343C054_1	8.5
Multifamily	18C343C055	18C343C055	18C343C055	8
Multifamily	18C342C019	18C342C019	18C342C019_2	8.5
Multifamily	18C346C040	18C346C040	18C346C040_5	8.5
Multifamily	18C342C075	18C342C075	18C342C075_3	7
Multifamily	18C343C098	18C343C098	18C343C098_2	9
Multifamily	18B168C031	18B168C031	18B168C031_1	7
Multifamily	18C343C069	18C343C069	18C343C069_4	10.5
Multifamily	18C343C071	18C343C071	18C343C071_3	7
Multifamily	18C343C061	18C343C061	18C343C061_3	9.5
Multifamily	18C343C056	18C343C056	18C343C056_7	9.5
Multifamily	18C347C024	18C347C024	18C347C024_3	6
Multifamily	18C346C063	18C346C063	18C346C063	7.5
Multifamily	18C346C067	18C346C067	18C346C067_1	8
Multifamily	18C346C077	18C346C077	18C346C077_4	7.5
Multifamily	18C346C020	18C346C020	18C346C020	7
Multifamily	18C346C022	18C346C022	18C346C022_1	8
Multifamily	18C346C086	18C346C086	18C346C086_5	8
Multifamily	18B168C087	18B168C087	18B168C087_2	11.5
Multifamily	18C343C005	18C343C005	18C343C005_1	8
Multifamily	18C342C100	18C342C100	18C342C100_2	7
Multifamily	18C343C081	18C343C081	18C343C081_2	10
Multifamily	18C342C048	18C342C048	18C342C048	7
Multifamily	18C342C036	18C342C036	18C342C036	6
Multifamily	18C347C094	18C347C094	18C347C094	8
Multifamily	18C346C034	18C346C034	18C346C034_5	8.5
Multifamily	18C343C055	18C343C055	18C343C055_1	7
Multifamily	18C342C017	18C342C017	18C342C017	7
Multifamily	18C346C049	18C346C049	18C346C049_2	7.5
Multifamily	18C342C091	18C342C091	18C342C091_2	6
Multifamily	18C342C090	18C342C090	18C342C090_1	8.5
Multifamily	18C342C092	18C342C092	18C342C092	7
Multifamily	18C343C040	18C343C040	18C343C040_5	8.5
Multifamily	18C343C043	18C343C043	18C343C043_3	7
Multifamily	18C343C045	18C343C045	18C343C045	7
Multifamily	18B168C001	18B168C001	18B168C001_1	8.5
Multifamily	18C342C008	18C342C008	18C342C008_2	8
Multifamily	18C343C096	18C343C096	18C343C096_1	11.5
Multifamily	18C343C030	18C343C030	18C343C030_1	9.5
Multifamily	18C343C035	18C343C035	18C343C035	8.5
Multifamily	18C343C065	18C343C065	18C343C065_3	9.5
Multifamily	18C343C064	18C343C064	18C343C064	8.5
Multifamily	18C346C091	18C346C091	18C346C091	8.5
Multifamily	18C346C093	18C346C093	18C346C093_2	8.5
Multifamily	18C346C092	18C346C092	18C346C092_2	9.5
Multifamily	18C346C092	18C346C092	18C346C092_3	9.5
Multifamily	18C346C099	18C346C099	18C346C099_2	7
Multifamily	18C347C031	18C347C031	18C347C031_2	7.5
Multifamily	18C347C027	18C347C027	18C347C027_1	7
Multifamily	18C346C056	18C346C056	18C346C056_1	7.5
Multifamily	18C346C064	18C346C064	18C346C064_1	9.5
Multifamily	18C346C066	18C346C066	18C346C066_2	8.5
Multifamily	18C346C021	18C346C021	18C346C021_1	8.5
Multifamily	18C346C086	18C346C086	18C346C086_6	8
Multifamily	18C347C069	18C347C069	18C347C069_1	7.5
Multifamily	18C347C059	18C347C059	18C347C059_2	7
Multifamily	18C342C073	18C342C073	18C342C073_1	8.5
Multifamily	18B168C068	18B168C068	18B168C068	9.5
Multifamily	18B168C063	18B168C063	18B168C063	10.5
Multifamily	18B168C057	18B168C057	18B168C057	9.5
Multifamily	18B168C058	18B168C058	18B168C058	7.5
Multifamily	18C343C081	18C343C081	18C343C081_3	9
Multifamily	18C342C040	18C342C040	18C342C040_2	7.5
Multifamily	18C347C094	18C347C094	18C347C094_1	8
Multifamily	18C343C017	18C343C017	18C343C017	7
Multifamily	18C342C066	18C342C066	18C342C066_1	7
Multifamily	18C342C032	18C342C032	18C342C032_1	6
Multifamily	18C346C025	18C346C025	18C346C025_3	8.5
Multifamily	18C346C034	18C346C034	18C346C034_6	8
Multifamily	18C342C024	18C342C024	18C342C024_1	7
Multifamily	18C346C050	18C346C050	18C346C050_3	8
Multifamily	18B168C003	18B168C003	18B168C003	7
Multifamily	18C347C008	18C347C008	18C347C008	7
Multifamily	18C342C080	18C342C080	18C342C080_2	7
Multifamily	18C343C098	18C343C098	18C343C098_3	9
Multifamily	18B168C031	18B168C031	18B168C031_2	7
Multifamily	18C343C067	18C343C067	18C343C067_6	8
Multifamily	18C343C071	18C343C071	18C343C071_4	7
Multifamily	18C343C056	18C343C056	18C343C056_8	8.5
Multifamily	18C346C093	18C346C093	18C346C093_3	8
Multifamily	18C346C092	18C346C092	18C346C092_4	7.5
Multifamily	18C346C097	18C346C097	18C346C097_1	7.5
Multifamily	18C347C037	18C347C037	18C347C037_1	7
Multifamily	18C347C038	18C347C038	18C347C038	7
Multifamily	18C347C020	18C347C020	18C347C020	7
Multifamily	18C346C066	18C346C066	18C346C066_3	7
Multifamily	18C346C003	18C346C003	18C346C003_2	7.5
Multifamily	18C346C081	18C346C081	18C346C081_2	8
Multifamily	18C346C079	18C346C079	18C346C079_3	9.5
Multifamily	18B168C087	18B168C087	18B168C087_3	8.5
Multifamily	18B168C074	18B168C074	18B168C074_1	8
Multifamily	18C347C074	18C347C074	18C347C074	9.5
Multifamily	18C347C067	18C347C067	18C347C067	7
Multifamily	18C347C070	18C347C070	18C347C070_5	7.5
Multifamily	18C347C058	18C347C058	18C347C058_4	7
Multifamily	18C347C059	18C347C059	18C347C059_3	7
Multifamily	18C347C051	18C347C051	18C347C051	8
Multifamily	18C342C052	18C342C052	18C342C052	7.5
Multifamily	18C343C004	18C343C004	18C343C004_1	8
Multifamily	05C197P002	05C197P002	05C197P002_3	7
Multifamily	18C343C080	18C343C080	18C343C080_2	7
Multifamily	18C347C099	18C347C099	18C347C099	6
Multifamily	18C347C079	18C347C079	18C347C079	7
Multifamily	18C347C087	18C347C087	18C347C087_1	6
Multifamily	18C347C096	18C347C096	18C347C096_1	8
Multifamily	18C343C011	18C343C011	18C343C011_2	7
Multifamily	18C346C050	18C346C050	18C346C050_4	8.5
Multifamily	18C342C009	18C342C009	18C342C009_1	7
Multifamily	18C346C043	18C346C043	18C346C043_1	7.5
Multifamily	18C346C038	18C346C038	18C346C038_3	7.5
Multifamily	18C347C002	18C347C002	18C347C002	8.5
Multifamily	18C342C083	18C342C083	18C342C083	7.5
Multifamily	18C343C021	18C343C021	18C343C021_2	8.5
Multifamily	18C343C027	18C343C027	18C343C027	6
Multifamily	18C343C026	18C343C026	18C343C026_2	8
Multifamily	18B168C031	18B168C031	18B168C031_3	9
Multifamily	18C343C065	18C343C065	18C343C065_4	8
Multifamily	18C343C070	18C343C070	18C343C070_3	8
Multifamily	18C343C070	18C343C070	18C343C070_4	8
Multifamily	18C347C035	18C347C035	18C347C035	8.5
Multifamily	18C347C031	18C347C031	18C347C031_3	7
Multifamily	18C347C029	18C347C029	18C347C029_3	8.5
Multifamily	18C347C020	18C347C020	18C347C020_1	7
Multifamily	18C346C079	18C346C079	18C346C079_4	8
Multifamily	18B168C074	18B168C074	18B168C074_2	8.5
Multifamily	18C347C077	18C347C077	18C347C077	7
Multifamily	18C347C055	18C347C055	18C347C055	7.5
Multifamily	18C347C056	18C347C056	18C347C056_1	9
Multifamily	18C347C047	18C347C047	18C347C047_1	7
Multifamily	18B168C024	18B168C024	18B168C024	9.5
Multifamily	18C343C086	18C343C086	18C343C086	8
Multifamily	18C342C049	18C342C049	18C342C049	7.5
Multifamily	18C343C018	18C343C018	18C343C018_1	9
Multifamily	18C343C018	18C343C018	18C343C018_2	8.5
Multifamily	18C342C029	18C342C029	18C342C029	8.5
Multifamily	18C346C026	18C346C026	18C346C026_6	9
Multifamily	18C343C046	18C343C046	18C343C046_1	7.5
Multifamily	18C343C054	18C343C054	18C343C054_2	8.5
Multifamily	18C343C055	18C343C055	18C343C055_2	8
Multifamily	18C342C021	18C342C021	18C342C021	8.5
Multifamily	18C346C049	18C346C049	18C346C049_3	7
Multifamily	18C342C088	18C342C088	18C342C088_1	8.5
Multifamily	18C343C044	18C343C044	18C343C044_2	7
Multifamily	18B168C007	18B168C007	18B168C007	9
Multifamily	18C342C005	18C342C005	18C342C005	7
Multifamily	18C343C098	18C343C098	18C343C098_4	9.5
Multifamily	18C343C097	18C343C097	18C343C097_5	9.5
Multifamily	18B168C049	18B168C049	18B168C049	8
Multifamily	18B168C038	18B168C038	18B168C038	8.5
Multifamily	18C343C067	18C343C067	18C343C067_7	8.5
Multifamily	18C343C064	18C343C064	18C343C064_1	6
Multifamily	18C343C060	18C343C060	18C343C060_1	6
Multifamily	18C347C041	18C347C041	18C347C041_1	7
Multifamily	18C347C036	18C347C036	18C347C036_2	7.5
Multifamily	18C347C037	18C347C037	18C347C037_2	6
Multifamily	18C347C029	18C347C029	18C347C029_4	8.5
Multifamily	18C347C021	18C347C021	18C347C021_1	7.5
Multifamily	18C346C058	18C346C058	18C346C058	7
Multifamily	18C346C069	18C346C069	18C346C069_4	8.5
Multifamily	18C346C016	18C346C016	18C346C016_4	7
Multifamily	18C346C024	18C346C024	18C346C024_4	NA
Multifamily	18C346C023	18C346C023	18C346C023_1	8.5
Multifamily	18C346C082	18C346C082	18C346C082_1	6
Multifamily	18B168C096	18B168C096	18B168C096	10.5
Multifamily	18B168C098	18B168C098	18B168C098	8
Multifamily	18C347C063	18C347C063	18C347C063_1	5
Multifamily	18C347C048	18C347C048	18C347C048_4	6
Multifamily	18C347C046	18C347C046	18C347C046_1	7
Multifamily	18C343C009	18C343C009	18C343C009_2	7
Multifamily	18C342C095	18C342C095	18C342C095	7
Multifamily	18C347C091	18C347C091	18C347C091_2	6
Multifamily	18C347C081	18C347C081	18C347C081	7
Multifamily	18C343C018	18C343C018	18C343C018_3	9.5
Multifamily	18C346C034	18C346C034	18C346C034_7	8
Multifamily	18C346C029	18C346C029	18C346C029_2	9
Multifamily	18C343C052	18C343C052	18C343C052_2	9.5
Multifamily	18C346C049	18C346C049	18C346C049_4	8
Multifamily	18C342C089	18C342C089	18C342C089_4	6
Multifamily	18C343C043	18C343C043	18C343C043_4	8
Multifamily	18C347C011	18C347C011	18C347C011_1	6
Multifamily	18C342C005	18C342C005	18C342C005_1	7
Multifamily	18C342C075	18C342C075	18C342C075_4	7.5
Multifamily	18C343C025	18C343C025	18C343C025_3	8.5
Multifamily	18B168C045	18B168C045	18B168C045_1	7.5
Multifamily	18C343C060	18C343C060	18C343C060_2	7
Multifamily	18C346C093	18C346C093	18C346C093_4	9
Multifamily	18C346C096	18C346C096	18C346C096	8
Multifamily	18C347C042	18C347C042	18C347C042_5	8.5
Multifamily	18C346C069	18C346C069	18C346C069_5	7
Multifamily	18C346C083	18C346C083	18C346C083	8.5
Multifamily	18C346C082	18C346C082	18C346C082_2	8
Multifamily	18C347C080	18C347C080	18C347C080_1	7.5
Multifamily	18C347C065	18C347C065	18C347C065_2	9
Multifamily	18C347C057	18C347C057	18C347C057_2	8
Multifamily	18C342C070	18C342C070	18C342C070_4	7
Multifamily	18C343C010	18C343C010	18C343C010	10.5
Multifamily	18C342C100	18C342C100	18C342C100_3	7
Multifamily	18C343C086	18C343C086	18C343C086_1	8.5
Multifamily	18C343C092	18C343C092	18C343C092	8
Multifamily	18C343C080	18C343C080	18C343C080_3	8.5
Multifamily	18C347C093	18C347C093	18C347C093	8.5
Multifamily	18C342C043	18C342C043	18C342C043	7
Multifamily	18C342C065	18C342C065	18C342C065_1	7
Multifamily	18C347C096	18C347C096	18C347C096_2	8.5
Multifamily	18C343C014	18C343C014	18C343C014	9
Multifamily	18C342C029	18C342C029	18C342C029_1	7
Multifamily	18C342C029	18C342C029	18C342C029_2	7
Multifamily	18C346C025	18C346C025	18C346C025_4	8.5
Multifamily	18C343C053	18C343C053	18C343C053_2	7
Multifamily	18C343C054	18C343C054	18C343C054_3	8
Multifamily	18C343C039	18C343C039	18C343C039_1	8.5
Multifamily	18C343C044	18C343C044	18C343C044_3	7
Multifamily	18C343C045	18C343C045	18C343C045_1	7
Multifamily	18C346C043	18C346C043	18C346C043_2	6
Multifamily	18C347C002	18C347C002	18C347C002_1	7
Multifamily	18C347C005	18C347C005	18C347C005	7
Multifamily	18C342C002	18C342C002	18C342C002_1	7
Multifamily	18C343C035	18C343C035	18C343C035_1	7
Multifamily	18B168C045	18B168C045	18B168C045_2	8
Multifamily	18B168C035	18B168C035	18B168C035	8
Multifamily	18B168C031	18B168C031	18B168C031_4	8
Multifamily	18C343C071	18C343C071	18C343C071_5	7
Multifamily	18C346C091	18C346C091	18C346C091_1	8.5
Multifamily	18C347C035	18C347C035	18C347C035_1	6
Multifamily	18C347C031	18C347C031	18C347C031_4	7
Multifamily	18C347C029	18C347C029	18C347C029_5	7
Multifamily	18C347C014	18C347C014	18C347C014	7.5
Multifamily	18B168C017	18B168C017	18B168C017_1	11.5
Multifamily	18C346C061	18C346C061	18C346C061	8.5
Multifamily	18C346C071	18C346C071	18C346C071_1	8
Multifamily	18C346C078	18C346C078	18C346C078	8.5
Multifamily	18C346C009	18C346C009	18C346C009	7
Multifamily	18C346C023	18C346C023	18C346C023_2	9
Multifamily	18C346C079	18C346C079	18C346C079_5	8.5
Multifamily	18C346C082	18C346C082	18C346C082_3	6
Multifamily	18B168C084	18B168C084	18B168C084	8.5
Multifamily	18C347C077	18C347C077	18C347C077_1	7
Multifamily	18C347C075	18C347C075	18C347C075_2	8.5
Multifamily	18C347C065	18C347C065	18C347C065_3	8
Multifamily	18C347C068	18C347C068	18C347C068_2	9.5
Multifamily	18C347C061	18C347C061	18C347C061	7
Multifamily	18C347C056	18C347C056	18C347C056_2	8.5
Multifamily	18C347C057	18C347C057	18C347C057_3	7
Multifamily	18C347C053	18C347C053	18C347C053_1	7
Multifamily	18C347C046	18C347C046	18C347C046_2	6
Multifamily	18C342C096	18C342C096	18C342C096	6
Multifamily	18B168C064	18B168C064	18B168C064	7.5
Multifamily	05C197P002	05C197P002	05C197P002_4	7
Multifamily	18C343C075	18C343C075	18C343C075	9.5
Multifamily	18C347C084	18C347C084	18C347C084	6
Multifamily	18C347C086	18C347C086	18C347C086_1	5
Multifamily	18C342C049	18C342C049	18C342C049_1	7
Multifamily	18C343C018	18C343C018	18C343C018_4	8
Multifamily	18C346C028	18C346C028	18C346C028	8.5
Multifamily	18C343C054	18C343C054	18C343C054_4	7
Multifamily	18C342C024	18C342C024	18C342C024_2	8.5
Multifamily	18C346C047	18C346C047	18C346C047_1	10.5
Multifamily	18C343C042	18C343C042	18C343C042_1	8
Multifamily	18C343C045	18C343C045	18C343C045_2	7.5
Multifamily	18C342C003	18C342C003	18C342C003_1	9.5
Multifamily	18C343C029	18C343C029	18C343C029_1	8.5
Multifamily	18C343C056	18C343C056	18C343C056_9	10.5
Multifamily	18C346C095	18C346C095	18C346C095	7
Multifamily	18C346C097	18C346C097	18C346C097_2	7.5
Multifamily	18C347C040	18C347C040	18C347C040_1	8.5
Multifamily	18C347C041	18C347C041	18C347C041_2	8
Multifamily	18C347C027	18C347C027	18C347C027_2	7
Multifamily	18C346C071	18C346C071	18C346C071_2	9.5
Multifamily	18C346C071	18C346C071	18C346C071_3	8.5
Multifamily	18C346C082	18C346C082	18C346C082_4	8
Multifamily	18B168C086	18B168C086	18B168C086	9.5
Multifamily	18C347C074	18C347C074	18C347C074_1	8.5
Multifamily	18C347C068	18C347C068	18C347C068_3	8.5
Multifamily	18C342C069	18C342C069	18C342C069	7.5
Multifamily	18C343C083	18C343C083	18C343C083	9.5
Multifamily	18C347C089	18C347C089	18C347C089	7
Multifamily	18C347C081	18C347C081	18C347C081_1	8.5
Multifamily	18C342C064	18C342C064	18C342C064	7
Multifamily	18C347C094	18C347C094	18C347C094_2	8
Multifamily	18C343C011	18C343C011	18C343C011_3	7
Multifamily	18C342C066	18C342C066	18C342C066_2	7.5
Multifamily	18C346C034	18C346C034	18C346C034_8	7
Multifamily	18C343C049	18C343C049	18C343C049	7
Multifamily	18C343C055	18C343C055	18C343C055_3	8
Multifamily	18C342C085	18C342C085	18C342C085	6
Multifamily	18C342C089	18C342C089	18C342C089_5	4
Multifamily	18B168C005	18B168C005	18B168C005	8
Multifamily	18B168C005	18B168C005	18B168C005_1	8.5
Multifamily	18C347C011	18C347C011	18C347C011_2	7
Multifamily	18C347C005	18C347C005	18C347C005_1	7
Multifamily	18C343C033	18C343C033	18C343C033_2	7
Multifamily	18C346C093	18C346C093	18C346C093_5	8.5
Multifamily	18C347C040	18C347C040	18C347C040_2	6
Multifamily	18C347C030	18C347C030	18C347C030_1	7
Multifamily	18C347C030	18C347C030	18C347C030_2	7
Multifamily	18C347C037	18C347C037	18C347C037_3	7
Multifamily	18C347C024	18C347C024	18C347C024_4	6
Multifamily	18C346C067	18C346C067	18C346C067_2	7
Multifamily	18C346C076	18C346C076	18C346C076	7
Multifamily	18C346C073	18C346C073	18C346C073	9.5
Multifamily	18C346C072	18C346C072	18C346C072_2	7
Multifamily	18C346C072	18C346C072	18C346C072_3	7
Multifamily	18C346C074	18C346C074	18C346C074_1	7
Multifamily	18C346C009	18C346C009	18C346C009_1	7
Multifamily	18C346C082	18C346C082	18C346C082_5	7
Multifamily	18B168C099	18B168C099	18B168C099	7.5
Multifamily	18C347C080	18C347C080	18C347C080_2	6
Multifamily	18C347C058	18C347C058	18C347C058_5	6
Multifamily	18C342C055	18C342C055	18C342C055	7.5
Multifamily	18C342C072	18C342C072	18C342C072	6
Multifamily	18C343C008	18C343C008	18C343C008_1	7
Multifamily	18C343C077	18C343C077	18C343C077_1	6
Multifamily	18C343C080	18C343C080	18C343C080_4	7
Multifamily	18C347C093	18C347C093	18C347C093_1	7.5
Multifamily	18C347C085	18C347C085	18C347C085	7
Multifamily	18C343C011	18C343C011	18C343C011_4	7
Multifamily	18C342C066	18C342C066	18C342C066_3	7
Multifamily	18C343C054	18C343C054	18C343C054_5	7
Multifamily	18C346C044	18C346C044	18C346C044_1	8
Multifamily	18C346C043	18C346C043	18C346C043_3	8.5
Multifamily	18B168C005	18B168C005	18B168C005_2	8
Multifamily	18C347C004	18C347C004	18C347C004	7
Multifamily	18C347C004	18C347C004	18C347C004_1	7
Multifamily	18C342C007	18C342C007	18C342C007_1	8
Multifamily	18C342C080	18C342C080	18C342C080_3	7
Multifamily	18C343C098	18C343C098	18C343C098_5	7.5
Multifamily	18C343C022	18C343C022	18C343C022_3	9.5
Multifamily	18B168C045	18B168C045	18B168C045_3	8
Multifamily	18B168C032	18B168C032	18B168C032	8
Multifamily	18B168C038	18B168C038	18B168C038_1	9
Multifamily	18C343C061	18C343C061	18C343C061_4	9.5
Multifamily	18C346C091	18C346C091	18C346C091_2	8.5
Multifamily	18C346C099	18C346C099	18C346C099_3	8
Multifamily	18C347C034	18C347C034	18C347C034	7
Multifamily	18C347C017	18C347C017	18C347C017	8
Multifamily	18C347C018	18C347C018	18C347C018_1	8
Multifamily	18C347C014	18C347C014	18C347C014_1	7
Multifamily	18C346C058	18C346C058	18C346C058_1	9
Multifamily	18C346C072	18C346C072	18C346C072_4	10.5
Multifamily	18C346C072	18C346C072	18C346C072_5	8.5
Multifamily	18C346C022	18C346C022	18C346C022_2	8.5
Multifamily	18C346C085	18C346C085	18C346C085	8.5
Multifamily	18C347C080	18C347C080	18C347C080_3	7
Multifamily	18C347C071	18C347C071	18C347C071	7.5
Multifamily	18C347C065	18C347C065	18C347C065_4	9.5
Multifamily	18C347C059	18C347C059	18C347C059_4	7
Multifamily	18C342C059	18C342C059	18C342C059_2	8
Multifamily	18B168C062	18B168C062	18B168C062	7.5
Multifamily	18B168C051	18B168C051	18B168C051	7
Multifamily	18C343C088	18C343C088	18C343C088_1	7
Multifamily	18C343C085	18C343C085	18C343C085	8
Multifamily	18C343C080	18C343C080	18C343C080_5	7
Multifamily	18C343C083	18C343C083	18C343C083_1	9.5
Multifamily	18C347C093	18C347C093	18C347C093_2	8.5
Multifamily	18C347C082	18C347C082	18C347C082_2	7
Multifamily	18C347C086	18C347C086	18C347C086_2	5
Multifamily	18C342C044	18C342C044	18C342C044	7
Multifamily	18C342C042	18C342C042	18C342C042	7.5
Multifamily	18C342C063	18C342C063	18C342C063	8.5
Multifamily	18C346C044	18C346C044	18C346C044_2	7
Multifamily	18C346C048	18C346C048	18C346C048	8.5
Multifamily	18C343C045	18C343C045	18C343C045_3	7
Multifamily	18C347C010	18C347C010	18C347C010_1	7
Multifamily	18C342C083	18C342C083	18C342C083_1	5
Multifamily	18C343C096	18C343C096	18C343C096_2	8.5
Multifamily	18C343C096	18C343C096	18C343C096_3	10
Multifamily	18C343C097	18C343C097	18C343C097_6	8.5
Multifamily	18C343C097	18C343C097	18C343C097_7	7.5
Multifamily	18C343C034	18C343C034	18C343C034_1	9
Multifamily	18C343C020	18C343C020	18C343C020	9.5
Multifamily	18C343C021	18C343C021	18C343C021_3	7
Multifamily	18C343C027	18C343C027	18C343C027_1	7
Multifamily	18B168C040	18B168C040	18B168C040	8.5
Multifamily	18C343C070	18C343C070	18C343C070_5	7.5
Multifamily	18C343C064	18C343C064	18C343C064_2	7
Multifamily	18C346C099	18C346C099	18C346C099_4	7
Multifamily	18C346C097	18C346C097	18C346C097_3	7.5
Multifamily	18C347C026	18C347C026	18C347C026	7
Multifamily	18C347C031	18C347C031	18C347C031_5	7
Multifamily	18C347C023	18C347C023	18C347C023_2	7
Multifamily	18C347C023	18C347C023	18C347C023_3	7
Multifamily	18C346C056	18C346C056	18C346C056_2	7
Multifamily	18C346C078	18C346C078	18C346C078_1	7
Multifamily	18C346C073	18C346C073	18C346C073_1	7
Multifamily	18B168C098	18B168C098	18B168C098_1	7.5
Multifamily	18C347C075	18C347C075	18C347C075_3	9.5
Multifamily	18C347C062	18C347C062	18C347C062	7
Multifamily	18C342C059	18C342C059	18C342C059_3	7
Multifamily	18C343C004	18C343C004	18C343C004_2	7
Multifamily	18C342C095	18C342C095	18C342C095_1	7
Multifamily	18C342C099	18C342C099	18C342C099_1	6
Multifamily	18B168C023	18B168C023	18B168C023_1	9
Multifamily	18C343C086	18C343C086	18C343C086_2	7.5
Multifamily	18C343C079	18C343C079	18C343C079_2	7
Multifamily	18C343C079	18C343C079	18C343C079_3	8
Multifamily	18C343C083	18C343C083	18C343C083_2	7
Multifamily	18C347C082	18C347C082	18C347C082_3	6
Multifamily	18C347C085	18C347C085	18C347C085_1	7
Multifamily	18C342C050	18C342C050	18C342C050_1	6
Multifamily	18C347C095	18C347C095	18C347C095_1	8.5
Multifamily	18C346C030	18C346C030	18C346C030	9.5
Multifamily	18C343C054	18C343C054	18C343C054_6	7
Multifamily	18C346C052	18C346C052	18C346C052	8
Multifamily	18C342C092	18C342C092	18C342C092_1	6
Multifamily	18C342C077	18C342C077	18C342C077_2	7
Multifamily	18C343C095	18C343C095	18C343C095_1	9.5
Multifamily	18C343C097	18C343C097	18C343C097_8	8.5
Multifamily	18C343C062	18C343C062	18C343C062_1	8.5
Multifamily	18C343C061	18C343C061	18C343C061_5	8.5
Multifamily	18C343C057	18C343C057	18C343C057_3	8
Multifamily	18C347C037	18C347C037	18C347C037_4	7
Multifamily	18C346C058	18C346C058	18C346C058_2	7.5
Multifamily	18C346C083	18C346C083	18C346C083_1	8.5
Multifamily	18C347C051	18C347C051	18C347C051_1	7
Multifamily	18C347C046	18C347C046	18C347C046_3	6
Multifamily	18C347C046	18C347C046	18C347C046_4	7
Multifamily	18B168C021	18B168C021	18B168C021	7
Multifamily	18B168C052	18B168C052	18B168C052	7
Multifamily	18C343C077	18C343C077	18C343C077_2	9.5
Multifamily	18C347C090	18C347C090	18C347C090	7
Multifamily	18C347C084	18C347C084	18C347C084_1	7
Multifamily	18C347C085	18C347C085	18C347C085_2	7
Multifamily	18C342C048	18C342C048	18C342C048_1	7
Multifamily	18C342C045	18C342C045	18C342C045	7
Multifamily	18C343C016	18C343C016	18C343C016_2	7.5
Multifamily	18C342C091	18C342C091	18C342C091_3	7
Multifamily	18C342C016	18C342C016	18C342C016	7
Multifamily	18C347C007	18C347C007	18C347C007_1	7
Multifamily	18C347C011	18C347C011	18C347C011_3	7
Multifamily	18C342C008	18C342C008	18C342C008_3	6
Multifamily	18C343C029	18C343C029	18C343C029_2	8.5
Multifamily	18B168C041	18B168C041	18B168C041_1	7
Multifamily	18C347C034	18C347C034	18C347C034_1	7
Multifamily	18C347C023	18C347C023	18C347C023_4	7
Multifamily	18C347C023	18C347C023	18C347C023_5	6
Multifamily	18C347C020	18C347C020	18C347C020_2	6
Multifamily	18C346C024	18C346C024	18C346C024_5	12
Multifamily	18C346C089	18C346C089	18C346C089_1	7.5
Multifamily	18C346C083	18C346C083	18C346C083_2	9.5
Multifamily	18C347C072	18C347C072	18C347C072_2	6
Multifamily	18C347C069	18C347C069	18C347C069_2	7
Multifamily	18C347C065	18C347C065	18C347C065_5	10.5
Multifamily	18C343C005	18C343C005	18C343C005_2	7.5
Multifamily	18C343C092	18C343C092	18C343C092_1	9.5
Multifamily	18C347C083	18C347C083	18C347C083	7.5
Multifamily	18C343C016	18C343C016	18C343C016_3	7
Multifamily	18C346C034	18C346C034	18C346C034_9	8.5
Multifamily	18C343C051	18C343C051	18C343C051	9
Multifamily	18C342C018	18C342C018	18C342C018_1	6
Multifamily	18C342C026	18C342C026	18C342C026	7
Multifamily	18C346C050	18C346C050	18C346C050_5	8
Multifamily	18C346C037	18C346C037	18C346C037_2	9.5
Multifamily	18C346C037	18C346C037	18C346C037_3	7.5
Multifamily	18C347C010	18C347C010	18C347C010_2	6
Multifamily	18C347C006	18C347C006	18C347C006	7.5
Multifamily	18C342C008	18C342C008	18C342C008_4	6
Multifamily	18C342C077	18C342C077	18C342C077_3	7
Multifamily	18C343C029	18C343C029	18C343C029_3	8
Multifamily	18C343C020	18C343C020	18C343C020_1	9
Multifamily	18B168C044	18B168C044	18B168C044	7
Multifamily	18B168C032	18B168C032	18B168C032_1	8
Multifamily	18C343C062	18C343C062	18C343C062_2	8.5
Multifamily	18C346C098	18C346C098	18C346C098	8.5
Multifamily	18C347C026	18C347C026	18C347C026_1	7
Multifamily	18C347C030	18C347C030	18C347C030_3	7
Multifamily	18C347C030	18C347C030	18C347C030_4	8
Multifamily	18C347C036	18C347C036	18C347C036_3	7.5
Multifamily	18C347C023	18C347C023	18C347C023_6	7
Multifamily	18C347C020	18C347C020	18C347C020_3	7
Multifamily	18C347C018	18C347C018	18C347C018_2	8.5
Multifamily	18C347C016	18C347C016	18C347C016_1	6
Multifamily	18C346C054	18C346C054	18C346C054	8.5
Multifamily	18C346C061	18C346C061	18C346C061_1	8.5
Multifamily	18C346C063	18C346C063	18C346C063_1	NA
Multifamily	18C346C073	18C346C073	18C346C073_2	9.5
Multifamily	18B168C070	18B168C070	18B168C070_1	8.5
Multifamily	18C347C071	18C347C071	18C347C071_1	7
Multifamily	18C347C062	18C347C062	18C347C062_1	7
Multifamily	18C342C058	18C342C058	18C342C058_1	7
Multifamily	18C342C070	18C342C070	18C342C070_5	7
Multifamily	18B168C028	18B168C028	18B168C028_1	7
Multifamily	18B168C066	18B168C066	18B168C066_1	7.5
Multifamily	16C108P065	16C108P065	16C108P065	5
Multifamily	18C347C092	18C347C092	18C347C092	8.5
Multifamily	18C347C085	18C347C085	18C347C085_3	7
Multifamily	18C347C085	18C347C085	18C347C085_4	7
Multifamily	18C347C087	18C347C087	18C347C087_2	6
Multifamily	18C342C049	18C342C049	18C342C049_2	7.5
Multifamily	18C342C047	18C342C047	18C342C047_1	6
Multifamily	18C342C051	18C342C051	18C342C051	6
Multifamily	18C342C041	18C342C041	18C342C041_1	6
Multifamily	18C347C096	18C347C096	18C347C096_3	7
Multifamily	18C347C096	18C347C096	18C347C096_4	8
Multifamily	18C347C095	18C347C095	18C347C095_2	9
Multifamily	18C342C028	18C342C028	18C342C028_1	7
Multifamily	18C346C029	18C346C029	18C346C029_3	8.5
Multifamily	18C346C048	18C346C048	18C346C048_1	9
Multifamily	18C342C091	18C342C091	18C342C091_4	6
Multifamily	18C342C084	18C342C084	18C342C084	7
Multifamily	18C343C045	18C343C045	18C343C045_4	7
Multifamily	18C347C010	18C347C010	18C347C010_3	7
Multifamily	18C347C006	18C347C006	18C347C006_1	7
Multifamily	18C342C002	18C342C002	18C342C002_2	6
Multifamily	18C343C093	18C343C093	18C343C093	7.5
Multifamily	18B168C045	18B168C045	18B168C045_4	7.5
Multifamily	18B168C032	18B168C032	18B168C032_2	7
Multifamily	18B168C036	18B168C036	18B168C036_1	7
Multifamily	18C343C062	18C343C062	18C343C062_3	7
Multifamily	18C343C063	18C343C063	18C343C063	6
Multifamily	18C346C097	18C346C097	18C346C097_4	7
Multifamily	18C347C026	18C347C026	18C347C026_2	7
Multifamily	18C347C034	18C347C034	18C347C034_2	7
Multifamily	18C347C013	18C347C013	18C347C013	7.5
Multifamily	18B168C010	18B168C010	18B168C010_2	9
Multifamily	18B168C011	18B168C011	18B168C011_2	7.5
Multifamily	18B168C016	18B168C016	18B168C016	8
Multifamily	18C346C056	18C346C056	18C346C056_3	8
Multifamily	18C346C078	18C346C078	18C346C078_2	8
Multifamily	18C346C020	18C346C020	18C346C020_1	7
Multifamily	18C346C086	18C346C086	18C346C086_7	7.5
Multifamily	18C346C085	18C346C085	18C346C085_1	8
Multifamily	18B168C080	18B168C080	18B168C080	9.5
Multifamily	18C347C071	18C347C071	18C347C071_2	7
Multifamily	18C347C048	18C347C048	18C347C048_5	6
Multifamily	18C347C047	18C347C047	18C347C047_2	6
Multifamily	18C342C053	18C342C053	18C342C053	7
Multifamily	18C342C069	18C342C069	18C342C069_1	6
Multifamily	18C343C005	18C343C005	18C343C005_3	7
Multifamily	18B168C063	18B168C063	18B168C063_1	9.5
Multifamily	18C343C085	18C343C085	18C343C085_1	7.5
Multifamily	18C343C086	18C343C086	18C343C086_3	7.5
Multifamily	18C343C076	18C343C076	18C343C076_4	8.5
Multifamily	18C343C076	18C343C076	18C343C076_5	8
Multifamily	18C343C016	18C343C016	18C343C016_4	7.5
Multifamily	18C343C046	18C343C046	18C343C046_2	8
Multifamily	18C342C019	18C342C019	18C342C019_3	7
Multifamily	18C346C046	18C346C046	18C346C046_1	8.5
Multifamily	18C342C016	18C342C016	18C342C016_1	8
Multifamily	18C342C009	18C342C009	18C342C009_2	7
Multifamily	18C343C039	18C343C039	18C343C039_2	6
Multifamily	18B168C036	18B168C036	18B168C036_2	8
Multifamily	18C343C064	18C343C064	18C343C064_3	6
Multifamily	18B168C013	18B168C013	18B168C013	9.5
Multifamily	18C346C053	18C346C053	18C346C053_2	7.5
Multifamily	18C346C071	18C346C071	18C346C071_4	8
Multifamily	18C346C078	18C346C078	18C346C078_3	9
Multifamily	18C346C072	18C346C072	18C346C072_6	8
Multifamily	18C346C020	18C346C020	18C346C020_2	7
Multifamily	18C346C023	18C346C023	18C346C023_3	8
Multifamily	18C347C073	18C347C073	18C347C073	11.5
Multifamily	18C347C052	18C347C052	18C347C052	5
Multifamily	18C343C005	18C343C005	18C343C005_4	7
Multifamily	18C342C095	18C342C095	18C342C095_2	7.5
Multifamily	18B168C030	18B168C030	18B168C030	7
Multifamily	18B168C062	18B168C062	18B168C062_1	7
Multifamily	18C347C079	18C347C079	18C347C079_1	6
Multifamily	18C342C017	18C342C017	18C342C017_1	6
Multifamily	18C346C044	18C346C044	18C346C044_3	7
Multifamily	18C343C044	18C343C044	18C343C044_4	7
Multifamily	18C347C002	18C347C002	18C347C002_2	7
Multifamily	18C343C100	18C343C100	18C343C100	6
Multifamily	18C343C019	18C343C019	18C343C019_2	7
Multifamily	18C347C026	18C347C026	18C347C026_3	7
Multifamily	18C347C034	18C347C034	18C347C034_3	7
Multifamily	18C347C012	18C347C012	18C347C012	8
Multifamily	18C346C054	18C346C054	18C346C054_1	7
Multifamily	18C346C064	18C346C064	18C346C064_2	8.5
Multifamily	18C346C073	18C346C073	18C346C073_3	7
Multifamily	18C342C069	18C342C069	18C342C069_2	6
Multifamily	18C343C003	18C343C003	18C343C003	7.5
Multifamily	18C343C009	18C343C009	18C343C009_3	7
Multifamily	18B168C057	18B168C057	18B168C057_1	8.5
Multifamily	18C347C085	18C347C085	18C347C085_5	7
Multifamily	18C343C013	18C343C013	18C343C013	6
Multifamily	18C343C014	18C343C014	18C343C014_1	8.5
Multifamily	18C343C018	18C343C018	18C343C018_5	9.5
Multifamily	18C342C029	18C342C029	18C342C029_3	8.5
Multifamily	18C343C049	18C343C049	18C343C049_1	8.5
Multifamily	18C343C053	18C343C053	18C343C053_3	7
Multifamily	18C342C021	18C342C021	18C342C021_1	8.5
Multifamily	18C346C048	18C346C048	18C346C048_2	8.5
Multifamily	18C346C048	18C346C048	18C346C048_3	7
Multifamily	18C342C090	18C342C090	18C342C090_2	7.5
Multifamily	18C342C016	18C342C016	18C342C016_2	8
Multifamily	18B168C009	18B168C009	18B168C009	8
Multifamily	18C347C010	18C347C010	18C347C010_4	7
Multifamily	18C347C010	18C347C010	18C347C010_5	6
Multifamily	18C347C006	18C347C006	18C347C006_2	7
Multifamily	18C342C080	18C342C080	18C342C080_4	7
Multifamily	18C342C082	18C342C082	18C342C082_2	7
Multifamily	18C343C070	18C343C070	18C343C070_6	7
Multifamily	18C343C058	18C343C058	18C343C058	7
Multifamily	18C343C060	18C343C060	18C343C060_3	7
Multifamily	18C347C026	18C347C026	18C347C026_4	8
Multifamily	18C347C014	18C347C014	18C347C014_2	9.5
Multifamily	18C347C014	18C347C014	18C347C014_3	8
Multifamily	18B168C018	18B168C018	18B168C018_3	8.5
Multifamily	18C346C023	18C346C023	18C346C023_4	8
Multifamily	18B168C087	18B168C087	18B168C087_4	9.5
Multifamily	18B168C083	18B168C083	18B168C083	7.5
Multifamily	18B168C081	18B168C081	18B168C081_1	8
Multifamily	18C347C058	18C347C058	18C347C058_6	7
Multifamily	18C347C052	18C347C052	18C347C052_1	6
Multifamily	18C342C093	18C342C093	18C342C093	7
Multifamily	18B168C052	18B168C052	18B168C052_1	7
Multifamily	18B168C053	18B168C053	18B168C053	8
Multifamily	18C343C089	18C343C089	18C343C089_1	6
Multifamily	18C343C090	18C343C090	18C343C090	NA
Multifamily	18C343C085	18C343C085	18C343C085_2	7.5
Multifamily	18C343C081	18C343C081	18C343C081_4	8.5
Multifamily	18C343C083	18C343C083	18C343C083_3	8
Multifamily	18C347C093	18C347C093	18C347C093_3	8
Multifamily	18C347C081	18C347C081	18C347C081_2	8
Multifamily	18C342C036	18C342C036	18C342C036_1	7.5
Multifamily	18C343C011	18C343C011	18C343C011_5	7
Multifamily	18C343C048	18C343C048	18C343C048	8.5
Multifamily	18C343C051	18C343C051	18C343C051_1	7
Multifamily	18C347C011	18C347C011	18C347C011_4	7
Multifamily	18C347C011	18C347C011	18C347C011_5	7
Multifamily	18C347C006	18C347C006	18C347C006_3	7
Multifamily	18C343C032	18C343C032	18C343C032_2	7
Multifamily	18C343C026	18C343C026	18C343C026_3	7
Multifamily	18C343C060	18C343C060	18C343C060_4	8.5
Multifamily	18C346C099	18C346C099	18C346C099_5	7
Multifamily	18C347C040	18C347C040	18C347C040_3	8
Multifamily	18C347C042	18C347C042	18C347C042_6	7.5
Multifamily	18C347C029	18C347C029	18C347C029_6	7
Multifamily	18C346C054	18C346C054	18C346C054_2	7
Multifamily	18C346C063	18C346C063	18C346C063_2	7
Multifamily	18C346C079	18C346C079	18C346C079_6	7
Multifamily	18B168C100	18B168C100	18B168C100	6
Multifamily	18C347C077	18C347C077	18C347C077_2	7
Multifamily	18C347C071	18C347C071	18C347C071_3	7
Multifamily	18C347C071	18C347C071	18C347C071_4	7
Multifamily	18C347C054	18C347C054	18C347C054	8
Multifamily	18C347C061	18C347C061	18C347C061_1	7
Multifamily	18C342C068	18C342C068	18C342C068_1	7
Multifamily	18C343C010	18C343C010	18C343C010_1	7.5
Multifamily	18B168C055	18B168C055	18B168C055	8.5
Multifamily	16C108P065	16C108P065	16C108P065_1	6
Multifamily	18C343C089	18C343C089	18C343C089_2	7.5
Multifamily	18C343C081	18C343C081	18C343C081_5	9.5
Multifamily	18C343C083	18C343C083	18C343C083_4	7
Multifamily	18C346C030	18C346C030	18C346C030_1	9.5
Multifamily	18C346C049	18C346C049	18C346C049_5	7.5
Multifamily	18C342C091	18C342C091	18C342C091_5	6
Multifamily	18C346C037	18C346C037	18C346C037_4	7
Multifamily	18C347C007	18C347C007	18C347C007_2	7
Multifamily	18C347C005	18C347C005	18C347C005_2	7
Multifamily	18C342C002	18C342C002	18C342C002_3	6
Multifamily	18C343C095	18C343C095	18C343C095_2	7.5
Multifamily	18C343C032	18C343C032	18C343C032_3	8
Multifamily	18C343C021	18C343C021	18C343C021_4	7.5
Multifamily	18B168C050	18B168C050	18B168C050	8
Multifamily	18B168C036	18B168C036	18B168C036_3	8
Multifamily	18C343C068	18C343C068	18C343C068_1	8
Multifamily	18C347C026	18C347C026	18C347C026_5	7
Multifamily	18C347C030	18C347C030	18C347C030_5	7
Multifamily	18B168C016	18B168C016	18B168C016_1	9.5
Multifamily	18C346C056	18C346C056	18C346C056_4	7
Multifamily	18C346C054	18C346C054	18C346C054_3	8
Multifamily	18C346C078	18C346C078	18C346C078_4	8.5
Multifamily	18C346C023	18C346C023	18C346C023_5	8
Multifamily	18C342C093	18C342C093	18C342C093_1	7.5
Multifamily	18C343C092	18C343C092	18C343C092_2	7.5
Multifamily	18C347C092	18C347C092	18C347C092_1	7
Multifamily	18C342C041	18C342C041	18C342C041_2	6
Multifamily	18C343C049	18C343C049	18C343C049_2	7.5
Multifamily	18C343C049	18C343C049	18C343C049_3	7
Multifamily	18C342C018	18C342C018	18C342C018_2	6
Multifamily	18C342C019	18C342C019	18C342C019_4	8.5
Multifamily	18C346C048	18C346C048	18C346C048_4	8.5
Multifamily	18C343C042	18C343C042	18C343C042_2	7
Multifamily	18B168C009	18B168C009	18B168C009_1	7
Multifamily	18C343C098	18C343C098	18C343C098_6	9
Multifamily	18C346C097	18C346C097	18C346C097_5	7
Multifamily	18C347C041	18C347C041	18C347C041_3	8
Multifamily	18C347C016	18C347C016	18C347C016_2	8.5
Multifamily	18C347C015	18C347C015	18C347C015_2	6
Multifamily	18B168C013	18B168C013	18B168C013_1	8.5
Multifamily	18C347C089	18C347C089	18C347C089_1	6
Multifamily	18C342C043	18C342C043	18C342C043_1	6
Multifamily	18C342C034	18C342C034	18C342C034_1	6
Multifamily	18C342C035	18C342C035	18C342C035_1	7
Multifamily	18C343C046	18C343C046	18C343C046_3	8
Multifamily	18C342C019	18C342C019	18C342C019_5	7
Multifamily	18C346C045	18C346C045	18C346C045_3	8
Multifamily	18C346C050	18C346C050	18C346C050_6	8
Multifamily	18C342C091	18C342C091	18C342C091_6	6
Multifamily	18C343C042	18C343C042	18C343C042_3	6
Multifamily	18C343C045	18C343C045	18C343C045_5	8
Multifamily	18C347C006	18C347C006	18C347C006_4	7
Multifamily	18C342C080	18C342C080	18C342C080_5	7.5
Multifamily	18C342C078	18C342C078	18C342C078_1	7.5
Multifamily	18B168C046	18B168C046	18B168C046	7
Multifamily	18B168C037	18B168C037	18B168C037	8
Multifamily	18C346C097	18C346C097	18C346C097_6	7.5
Multifamily	18C347C028	18C347C028	18C347C028_2	7.5
Multifamily	18C347C019	18C347C019	18C347C019	7
Multifamily	18C347C015	18C347C015	18C347C015_3	7
Multifamily	18C347C012	18C347C012	18C347C012_1	7
Multifamily	18B168C018	18B168C018	18B168C018_4	8.5
Multifamily	18C346C067	18C346C067	18C346C067_3	7
Multifamily	18C346C073	18C346C073	18C346C073_4	9.5
Multifamily	18B168C077	18B168C077	18B168C077	7
Multifamily	18C343C005	18C343C005	18C343C005_5	7
Multifamily	18C343C006	18C343C006	18C343C006	6
Multifamily	18B168C064	18B168C064	18B168C064_1	7
Multifamily	18B168C067	18B168C067	18B168C067	8.5
Multifamily	18B168C058	18B168C058	18B168C058_1	7
Multifamily	18C347C099	18C347C099	18C347C099_1	6
Multifamily	18C347C100	18C347C100	18C347C100	7.5
Multifamily	18C347C095	18C347C095	18C347C095_3	8.5
Multifamily	18C343C013	18C343C013	18C343C013_1	7
Multifamily	18C343C013	18C343C013	18C343C013_2	6
Multifamily	18C343C014	18C343C014	18C343C014_2	7.5
Multifamily	18C343C049	18C343C049	18C343C049_4	7
Multifamily	18C343C039	18C343C039	18C343C039_3	7
Multifamily	18C346C035	18C346C035	18C346C035	7.5
Multifamily	18C343C099	18C343C099	18C343C099_3	7
Multifamily	18C343C095	18C343C095	18C343C095_3	7
Multifamily	18B168C047	18B168C047	18B168C047_1	7.5
Multifamily	18C343C060	18C343C060	18C343C060_5	8.5
Multifamily	18C347C022	18C347C022	18C347C022_3	7.5
Multifamily	18C347C018	18C347C018	18C347C018_3	7.5
Multifamily	18C347C015	18C347C015	18C347C015_4	8
Multifamily	18C347C014	18C347C014	18C347C014_4	6
Multifamily	18C347C055	18C347C055	18C347C055_1	7
Multifamily	18C343C005	18C343C005	18C343C005_6	7.5
Multifamily	18B168C062	18B168C062	18B168C062_2	7
Multifamily	18B168C051	18B168C051	18B168C051_1	7
Multifamily	18C343C088	18C343C088	18C343C088_2	7.5
Multifamily	18C343C092	18C343C092	18C343C092_3	7.5
Multifamily	18C343C081	18C343C081	18C343C081_6	8.5
Multifamily	18C342C047	18C342C047	18C342C047_2	7
Multifamily	18C343C013	18C343C013	18C343C013_3	6
Multifamily	18C342C027	18C342C027	18C342C027_1	6
Multifamily	18C347C011	18C347C011	18C347C011_6	8
Multifamily	18C343C032	18C343C032	18C343C032_4	7.5
Multifamily	18C347C035	18C347C035	18C347C035_2	7
Multifamily	18B168C013	18B168C013	18B168C013_2	8.5
Multifamily	18C346C067	18C346C067	18C346C067_4	6
Multifamily	18C346C076	18C346C076	18C346C076_1	6
Multifamily	18C346C089	18C346C089	18C346C089_2	6
Multifamily	18B168C088	18B168C088	18B168C088	9.5
Multifamily	18B168C085	18B168C085	18B168C085	7
Multifamily	18C342C097	18C342C097	18C342C097	7
Multifamily	18B168C051	18B168C051	18B168C051_2	8
Multifamily	18C347C089	18C347C089	18C347C089_2	7.5
Multifamily	18C347C083	18C347C083	18C347C083_1	7
Multifamily	18C342C092	18C342C092	18C342C092_2	7
Multifamily	18C343C042	18C343C042	18C343C042_4	7
Multifamily	18C347C026	18C347C026	18C347C026_6	7
Multifamily	18C347C034	18C347C034	18C347C034_4	7
Multifamily	18C347C022	18C347C022	18C347C022_4	7.5
Multifamily	18C347C022	18C347C022	18C347C022_5	7.5
Multifamily	18C347C018	18C347C018	18C347C018_4	7
Multifamily	18C346C073	18C346C073	18C346C073_5	7
Multifamily	18C347C046	18C347C046	18C347C046_5	7
Multifamily	18C342C057	18C342C057	18C342C057	4
Multifamily	18C343C008	18C343C008	18C343C008_2	7
Multifamily	18C342C093	18C342C093	18C342C093_2	7
Multifamily	16C108P065	16C108P065	16C108P065_2	7
Multifamily	18C343C089	18C343C089	18C343C089_3	7
Multifamily	18C343C090	18C343C090	18C343C090_1	7.5
Multifamily	18C347C092	18C347C092	18C347C092_2	7
Multifamily	18C347C093	18C347C093	18C347C093_4	7
Multifamily	18C347C081	18C347C081	18C347C081_3	7.5
Multifamily	18C343C049	18C343C049	18C343C049_5	7
Multifamily	18C343C053	18C343C053	18C343C053_4	7
Multifamily	18C346C050	18C346C050	18C346C050_7	7
Multifamily	18C342C076	18C342C076	18C342C076_1	7
Multifamily	18C343C035	18C343C035	18C343C035_2	7
Multifamily	18C343C019	18C343C019	18C343C019_3	8
Multifamily	18C343C060	18C343C060	18C343C060_6	9.5
Multifamily	18C346C095	18C346C095	18C346C095_1	7
Multifamily	18C347C044	18C347C044	18C347C044	7
Multifamily	18C347C034	18C347C034	18C347C034_5	7
Multifamily	18C347C034	18C347C034	18C347C034_6	7
Multifamily	18C347C018	18C347C018	18C347C018_5	8
Multifamily	18C347C014	18C347C014	18C347C014_5	7
Multifamily	18C346C053	18C346C053	18C346C053_3	7
Multifamily	18C346C073	18C346C073	18C346C073_6	7.5
Multifamily	18B168C100	18B168C100	18B168C100_1	5
Multifamily	18B168C086	18B168C086	18B168C086_1	9.5
Multifamily	18C347C077	18C347C077	18C347C077_3	8
Multifamily	18C342C053	18C342C053	18C342C053_1	7
Multifamily	18C347C095	18C347C095	18C347C095_4	7.5
Multifamily	18C343C014	18C343C014	18C343C014_3	7
Multifamily	18C343C014	18C343C014	18C343C014_4	7
Multifamily	18C343C046	18C343C046	18C343C046_4	7.5
Multifamily	18C343C058	18C343C058	18C343C058_1	8.5
Multifamily	18C346C098	18C346C098	18C346C098_1	7.5
Multifamily	18C346C098	18C346C098	18C346C098_2	6
Multifamily	18C346C095	18C346C095	18C346C095_2	7
Multifamily	18C346C096	18C346C096	18C346C096_1	7.5
Multifamily	18C347C044	18C347C044	18C347C044_1	7
Multifamily	18C347C014	18C347C014	18C347C014_6	6
Multifamily	18C346C059	18C346C059	18C346C059	7
Multifamily	18C346C085	18C346C085	18C346C085_2	7
Multifamily	18B168C078	18B168C078	18B168C078	6
Multifamily	18B168C058	18B168C058	18B168C058_2	7
Multifamily	05C197P002	05C197P002	05C197P002_5	7
Multifamily	18C343C092	18C343C092	18C343C092_4	6
Multifamily	18C343C046	18C343C046	18C343C046_5	8
Multifamily	18C343C039	18C343C039	18C343C039_4	7
Multifamily	18B168C007	18B168C007	18B168C007_1	8
Multifamily	18C347C007	18C347C007	18C347C007_3	7
Multifamily	18C342C083	18C342C083	18C342C083_2	6
Multifamily	18C343C093	18C343C093	18C343C093_1	7.5
Multifamily	18C343C032	18C343C032	18C343C032_5	7.5
Multifamily	18C343C034	18C343C034	18C343C034_2	7
Multifamily	18C347C042	18C347C042	18C347C042_7	8.5
Multifamily	18C346C072	18C346C072	18C346C072_7	8.5
Multifamily	18B168C098	18B168C098	18B168C098_2	7.5
Multifamily	18C347C067	18C347C067	18C347C067_1	7.5
Multifamily	18C347C056	18C347C056	18C347C056_3	7
Multifamily	18B168C055	18B168C055	18B168C055_1	7
Multifamily	16C108P065	16C108P065	16C108P065_3	5
Multifamily	18C343C048	18C343C048	18C343C048_1	7.5
Multifamily	18B168C042	18B168C042	18B168C042	7
Multifamily	18B168C038	18B168C038	18B168C038_2	7
Multifamily	18C347C040	18C347C040	18C347C040_4	6
Multifamily	18C347C018	18C347C018	18C347C018_6	7
Multifamily	18B168C073	18B168C073	18B168C073	8.5
Multifamily	18C342C093	18C342C093	18C342C093_3	8
Multifamily	18B168C055	18B168C055	18B168C055_2	7
Multifamily	18C347C093	18C347C093	18C347C093_5	7
Multifamily	18C346C030	18C346C030	18C346C030_2	9.5
Multifamily	18C343C048	18C343C048	18C343C048_2	8
Multifamily	18B168C004	18B168C004	18B168C004_1	6
Multifamily	18C346C096	18C346C096	18C346C096_2	6
Multifamily	18C347C034	18C347C034	18C347C034_7	7
Multifamily	18C347C023	18C347C023	18C347C023_7	7
Multifamily	18C347C012	18C347C012	18C347C012_2	7
Multifamily	18C346C059	18C346C059	18C346C059_1	7
Multifamily	18B168C097	18B168C097	18B168C097	7
Multifamily	18C343C006	18C343C006	18C343C006_1	7
Multifamily	18C342C093	18C342C093	18C342C093_4	6
Multifamily	18B168C025	18B168C025	18B168C025	8.5
Multifamily	18B168C067	18B168C067	18B168C067_1	7.5
Multifamily	18B168C055	18B168C055	18B168C055_3	7
Multifamily	18C343C092	18C343C092	18C343C092_5	7
Multifamily	18C347C095	18C347C095	18C347C095_5	7
Multifamily	18C346C030	18C346C030	18C346C030_3	9
Multifamily	18C346C096	18C346C096	18C346C096_3	7
Multifamily	18C347C018	18C347C018	18C347C018_7	8
Multifamily	18C347C014	18C347C014	18C347C014_7	6
Multifamily	18B168C013	18B168C013	18B168C013_3	8.5
Multifamily	18B168C099	18B168C099	18B168C099_1	6
Multifamily	18B168C085	18B168C085	18B168C085_1	6
Multifamily	18C347C074	18C347C074	18C347C074_2	7
Multifamily	18C347C071	18C347C071	18C347C071_5	6
Multifamily	18C347C052	18C347C052	18C347C052_2	6
Multifamily	18C343C085	18C343C085	18C343C085_3	8
Multifamily	18C342C042	18C342C042	18C342C042_1	6
Multifamily	18C346C030	18C346C030	18C346C030_4	8.5
Multifamily	18C346C044	18C346C044	18C346C044_4	8
Multifamily	18C347C007	18C347C007	18C347C007_4	7
Multifamily	18C343C095	18C343C095	18C343C095_4	7.5
Multifamily	18C346C097	18C346C097	18C346C097_7	7.5
Multifamily	18C347C036	18C347C036	18C347C036_4	7.5
Multifamily	18C346C053	18C346C053	18C346C053_4	6
Multifamily	18C347C061	18C347C061	18C347C061_2	7
Multifamily	18B168C065	18B168C065	18B168C065	8
Multifamily	18B168C050	18B168C050	18B168C050_1	7
Multifamily	18C347C043	18C347C043	18C347C043	7
Multifamily	18C347C012	18C347C012	18C347C012_3	7
Multifamily	18C346C059	18C346C059	18C346C059_2	6
Multifamily	18B168C088	18B168C088	18B168C088_1	9
Multifamily	18B168C077	18B168C077	18B168C077_1	6
Multifamily	18B168C072	18B168C072	18B168C072	6
Multifamily	18C347C100	18C347C100	18C347C100_1	7
Multifamily	18C342C037	18C342C037	18C342C037_1	6
Multifamily	18C347C095	18C347C095	18C347C095_6	9.5
Multifamily	18C343C048	18C343C048	18C343C048_3	7
Multifamily	18C343C049	18C343C049	18C343C049_6	7
Multifamily	18C346C048	18C346C048	18C346C048_5	8.5
Multifamily	18C347C011	18C347C011	18C347C011_7	7
Multifamily	18C343C021	18C343C021	18C343C021_5	7
Multifamily	18B168C036	18B168C036	18B168C036_4	7
Multifamily	18B168C035	18B168C035	18B168C035_1	8
Multifamily	18C347C044	18C347C044	18C347C044_2	7
Multifamily	18B168C072	18B168C072	18B168C072_1	7
Multifamily	18C343C008	18C343C008	18C343C008_3	4
Multifamily	18B168C053	18B168C053	18B168C053_1	7.5
Multifamily	18C347C081	18C347C081	18C347C081_4	7.5
Multifamily	18C346C030	18C346C030	18C346C030_5	8.5
Multifamily	18C346C030	18C346C030	18C346C030_6	8.5
Multifamily	18C347C006	18C347C006	18C347C006_5	7
Multifamily	18C343C093	18C343C093	18C343C093_2	5
Multifamily	18B168C045	18B168C045	18B168C045_5	7
Multifamily	18C347C043	18C347C043	18C347C043_1	7
Multifamily	18C347C012	18C347C012	18C347C012_4	7
Multifamily	18B168C016	18B168C016	18B168C016_2	8
Multifamily	18B168C052	18B168C052	18B168C052_2	7
Multifamily	18C347C083	18C347C083	18C347C083_2	7
Multifamily	18C342C038	18C342C038	18C342C038_2	6
Multifamily	18C342C029	18C342C029	18C342C029_4	8.5
Multifamily	18C343C046	18C343C046	18C343C046_6	7
Multifamily	18C346C045	18C346C045	18C346C045_4	7
Multifamily	18B168C047	18B168C047	18B168C047_2	7
Multifamily	18C347C012	18C347C012	18C347C012_5	7
Multifamily	18C347C012	18C347C012	18C347C012_6	7
Multifamily	18B168C014	18B168C014	18B168C014	8
Multifamily	18C346C053	18C346C053	18C346C053_5	7
Multifamily	18C346C078	18C346C078	18C346C078_5	8
Multifamily	18C346C073	18C346C073	18C346C073_7	7
Multifamily	18C343C051	18C343C051	18C343C051_2	7
Multifamily	18C346C050	18C346C050	18C346C050_8	7.5
Multifamily	18B168C079	18B168C079	18B168C079_1	6
Multifamily	18C347C050	18C347C050	18C347C050	7
Multifamily	18B168C063	18B168C063	18B168C063_2	8.5
Multifamily	18B168C065	18B168C065	18B168C065_1	6
Multifamily	18C347C095	18C347C095	18C347C095_7	9
Multifamily	18C346C035	18C346C035	18C346C035_1	8
Multifamily	18B168C042	18B168C042	18B168C042_1	7.5
Multifamily	18C347C043	18C347C043	18C347C043_2	7
Multifamily	18B168C099	18B168C099	18B168C099_2	6
Multifamily	18C347C073	18C347C073	18C347C073_1	7
Multifamily	18C342C072	18C342C072	18C342C072_1	5
Multifamily	18B168C019	18B168C019	18B168C019	7
Multifamily	18B168C065	18B168C065	18B168C065_2	7
Multifamily	18B168C055	18B168C055	18B168C055_4	6
Multifamily	18C343C075	18C343C075	18C343C075_1	7
Multifamily	18C346C052	18C346C052	18C346C052_1	7
Multifamily	18C347C012	18C347C012	18C347C012_7	7
Multifamily	18C347C073	18C347C073	18C347C073_2	9
Multifamily	18B168C065	18B168C065	18B168C065_3	6
Multifamily	18C343C083	18C343C083	18C343C083_5	7
Multifamily	18C343C014	18C343C014	18C343C014_5	7
Multifamily	18C343C081	18C343C081	18C343C081_7	8
Multifamily	18C347C083	18C347C083	18C347C083_3	7
Multifamily	18C343C006	18C343C006	18C343C006_2	6
Multifamily	18C343C006	18C343C006	18C343C006_3	6
Multifamily	18C343C077	18C343C077	18C343C077_3	6
Multifamily	18C343C014	18C343C014	18C343C014_6	6
Multifamily	18C342C061	18C342C061	18C342C061	6
Multifamily	18C342C020	18C342C020	18C342C020	7
Multifamily	18B168C038	18B168C038	18B168C038_3	7
Multifamily	18B168C013	18B168C013	18B168C013_4	7.5
Multifamily	18B168C013	18B168C013	18B168C013_5	8.5
Multifamily	18B168C097	18B168C097	18B168C097_1	6
Multifamily	18B168C067	18B168C067	18B168C067_2	8.5
Multifamily	18B168C055	18B168C055	18B168C055_5	7
Multifamily	18B168C051	18B168C051	18B168C051_3	6
Multifamily	18C347C095	18C347C095	18C347C095_8	7
Multifamily	18C342C002	18C342C002	18C342C002_4	7
Multifamily	18C342C002	18C342C002	18C342C002_5	6
Multifamily	18B168C031	18B168C031	18B168C031_5	6
Multifamily	18B168C044	18B168C044	18B168C044_1	7
Multifamily	18B168C044	18B168C044	18B168C044_2	7
Multifamily	18B168C086	18B168C086	18B168C086_2	7
Multifamily	18C347C044	18C347C044	18C347C044_3	7
Multifamily	18B168C053	18B168C053	18B168C053_2	7
Multifamily	18B168C053	18B168C053	18B168C053_3	6
Multifamily	18C346C052	18C346C052	18C346C052_2	7
Multifamily	18C343C075	18C343C075	18C343C075_2	7
Multifamily	18C343C048	18C343C048	18C343C048_4	7
Multifamily	18C346C088	18C346C088	18C346C088	8
Multifamily	18C347C043	18C347C043	18C347C043_3	7
Multifamily	18B168C044	18B168C044	18B168C044_3	7
Multifamily	18C347C061	18C347C061	18C347C061_3	7
Multifamily	18B168C014	18B168C014	18B168C014_1	7
Multifamily	18C342C034	18C342C034	18C342C034_2	6
Multifamily	18C343C051	18C343C051	18C343C051_3	NA
Multifamily	18C342C025	18C342C025	18C342C025_2	5
Multifamily	18C346C046	18C346C046	18C346C046_2	6
Multifamily	18C343C045	18C343C045	18C343C045_6	NA
Multifamily	18B168C003	18B168C003	18B168C003_1	NA
Multifamily	18C342C004	18C342C004	18C342C004	7
Multifamily	18C342C079	18C342C079	18C342C079	NA
Multifamily	18B168C039	18B168C039	18B168C039_1	NA
Multifamily	18C346C096	18C346C096	18C346C096_4	NA
Multifamily	18C346C069	18C346C069	18C346C069_6	NA
Multifamily	18C346C070	18C346C070	18C346C070_3	NA
Multifamily	18C346C009	18C346C009	18C346C009_2	NA
Multifamily	18C346C006	18C346C006	18C346C006_3	NA
Multifamily	18C346C020	18C346C020	18C346C020_3	7
Multifamily	18C346C086	18C346C086	18C346C086_8	NA
Multifamily	18B168C099	18B168C099	18B168C099_3	NA
Multifamily	18C342C057	18C342C057	18C342C057_1	NA
Multifamily	18C342C095	18C342C095	18C342C095_3	NA
Multifamily	18B168C023	18B168C023	18B168C023_2	NA
Multifamily	18C343C087	18C343C087	18C343C087	4
Multifamily	18C342C050	18C342C050	18C342C050_2	7
Multifamily	18C342C046	18C342C046	18C342C046_1	NA
Multifamily	18C342C051	18C342C051	18C342C051_1	7
Multifamily	18C342C020	18C342C020	18C342C020_1	NA
Multifamily	18C342C026	18C342C026	18C342C026_1	7
Multifamily	18C342C092	18C342C092	18C342C092_3	7
Multifamily	18C342C010	18C342C010	18C342C010	7
Multifamily	18C347C004	18C347C004	18C347C004_2	NA
Multifamily	18C343C032	18C343C032	18C343C032_6	7
Multifamily	18C343C021	18C343C021	18C343C021_6	NA
Multifamily	18C346C095	18C346C095	18C346C095_3	7
Multifamily	18C346C096	18C346C096	18C346C096_5	7
Multifamily	18C347C044	18C347C044	18C347C044_4	7
Multifamily	18C347C030	18C347C030	18C347C030_6	7
Multifamily	18C347C031	18C347C031	18C347C031_6	7
Multifamily	18C347C019	18C347C019	18C347C019_1	7
Multifamily	18B168C010	18B168C010	18B168C010_3	NA
Multifamily	18C346C053	18C346C053	18C346C053_6	NA
Multifamily	18C346C010	18C346C010	18C346C010_6	6
Multifamily	18C346C089	18C346C089	18C346C089_3	7
Multifamily	18B168C088	18B168C088	18B168C088_2	7
Multifamily	18C347C052	18C347C052	18C347C052_3	6
Multifamily	18C342C054	18C342C054	18C342C054_1	NA
Multifamily	18C342C054	18C342C054	18C342C054_2	NA
Multifamily	18C343C009	18C343C009	18C343C009_4	NA
Multifamily	18C342C097	18C342C097	18C342C097_1	6
Multifamily	18C347C090	18C347C090	18C347C090_1	6
Multifamily	18C347C087	18C347C087	18C347C087_3	6
Multifamily	18C342C051	18C342C051	18C342C051_2	7
Royal_Royce_x_Tangi	18C346C006	18C346C006	18C346C006	NA
Royal_Royce_x_Tangi	18C346C006	18C346C006	18C346C006_1	9.5
Royal_Royce_x_Tangi	18C346C012	18C346C012	18C346C012	11
Royal_Royce_x_Tangi	18C346C005	18C346C005	18C346C005	9
Royal_Royce_x_Tangi	18C346C024	18C346C024	18C346C024	11.5
Royal_Royce_x_Tangi	18C346C005	18C346C005	18C346C005_1	8
Royal_Royce_x_Tangi	18C346C032	18C346C032	18C346C032	9.5
Royal_Royce_x_Tangi	18C346C024	18C346C024	18C346C024_1	11.5
Royal_Royce_x_Tangi	18C346C032	18C346C032	18C346C032_1	11.5
Royal_Royce_x_Tangi	18C346C039	18C346C039	18C346C039	10.5
Royal_Royce_x_Tangi	18C346C086	18C346C086	18C346C086	9.5
Royal_Royce_x_Tangi	18C346C026	18C346C026	18C346C026	12
Royal_Royce_x_Tangi	18C346C010	18C346C010	18C346C010	9.5
Royal_Royce_x_Tangi	18C346C003	18C346C003	18C346C003	10
Royal_Royce_x_Tangi	18C346C037	18C346C037	18C346C037	9.5
Royal_Royce_x_Tangi	18C346C006	18C346C006	18C346C006_2	9.5
Royal_Royce_x_Tangi	18C346C010	18C346C010	18C346C010_1	8.5
Royal_Royce_x_Tangi	18C346C016	18C346C016	18C346C016	9
Royal_Royce_x_Tangi	18C346C025	18C346C025	18C346C025	12.5
Royal_Royce_x_Tangi	18C346C070	18C346C070	18C346C070	9
Royal_Royce_x_Tangi	18C346C074	18C346C074	18C346C074	9.5
Royal_Royce_x_Tangi	18C346C066	18C346C066	18C346C066	8
Royal_Royce_x_Tangi	18C346C024	18C346C024	18C346C024_2	7
Royal_Royce_x_Tangi	18C346C034	18C346C034	18C346C034	9
Royal_Royce_x_Tangi	18C346C012	18C346C012	18C346C012_1	10.5
Royal_Royce_x_Tangi	18C346C034	18C346C034	18C346C034_1	8
Royal_Royce_x_Tangi	18C346C068	18C346C068	18C346C068	8
Royal_Royce_x_Tangi	18C346C034	18C346C034	18C346C034_2	7
Royal_Royce_x_Tangi	18C346C045	18C346C045	18C346C045	9
Royal_Royce_x_Tangi	18C346C025	18C346C025	18C346C025_1	10
Royal_Royce_x_Tangi	18C346C010	18C346C010	18C346C010_2	9
Royal_Royce_x_Tangi	18C346C016	18C346C016	18C346C016_1	9.5
Royal_Royce_x_Tangi	18C346C081	18C346C081	18C346C081	6
Royal_Royce_x_Tangi	18C346C039	18C346C039	18C346C039_1	8.5
Royal_Royce_x_Tangi	18C346C092	18C346C092	18C346C092	9.5
Royal_Royce_x_Tangi	18C346C003	18C346C003	18C346C003_1	9
Royal_Royce_x_Tangi	18C346C034	18C346C034	18C346C034_3	8.5
Royal_Royce_x_Tangi	18C346C038	18C346C038	18C346C038	9
Royal_Royce_x_Tangi	18C346C062	18C346C062	18C346C062	8.5
Royal_Royce_x_Tangi	18C346C077	18C346C077	18C346C077	12.5
Royal_Royce_x_Tangi	18C346C010	18C346C010	18C346C010_3	9.5
Royal_Royce_x_Tangi	18C346C079	18C346C079	18C346C079	10.5
Royal_Royce_x_Tangi	18C346C039	18C346C039	18C346C039_2	8.5
Royal_Royce_x_Tangi	18C346C053	18C346C053	18C346C053	8.5
Royal_Royce_x_Tangi	18C346C070	18C346C070	18C346C070_1	8.5
Royal_Royce_x_Tangi	18C346C075	18C346C075	18C346C075	9.5
Royal_Royce_x_Tangi	18C346C010	18C346C010	18C346C010_4	9.5
Royal_Royce_x_Tangi	18C346C004	18C346C004	18C346C004	9
Royal_Royce_x_Tangi	18C346C016	18C346C016	18C346C016_2	9
Royal_Royce_x_Tangi	18C346C041	18C346C041	18C346C041	6
Royal_Royce_x_Tangi	18C346C077	18C346C077	18C346C077_1	10.5
Royal_Royce_x_Tangi	18C346C010	18C346C010	18C346C010_5	8.5
Royal_Royce_x_Tangi	18C346C004	18C346C004	18C346C004_1	8
Royal_Royce_x_Tangi	18C346C026	18C346C026	18C346C026_1	11.5
Royal_Royce_x_Tangi	18C346C045	18C346C045	18C346C045_1	8.5
Royal_Royce_x_Tangi	18C346C049	18C346C049	18C346C049	7
Royal_Royce_x_Tangi	18C346C043	18C346C043	18C346C043	11
Royal_Royce_x_Tangi	18C346C026	18C346C026	18C346C026_2	9.5
Royal_Royce_x_Tangi	18C346C040	18C346C040	18C346C040	8.5
Royal_Royce_x_Tangi	18C346C097	18C346C097	18C346C097	8.5
Royal_Royce_x_Tangi	18C346C055	18C346C055	18C346C055	10
Royal_Royce_x_Tangi	18C346C064	18C346C064	18C346C064	9.5
Royal_Royce_x_Tangi	18C346C068	18C346C068	18C346C068_1	8
Royal_Royce_x_Tangi	18C346C067	18C346C067	18C346C067	9.5
Royal_Royce_x_Tangi	18C346C086	18C346C086	18C346C086_1	8.5
Royal_Royce_x_Tangi	18C346C079	18C346C079	18C346C079_1	9.5
Royal_Royce_x_Tangi	18C346C034	18C346C034	18C346C034_4	7.5
Royal_Royce_x_Tangi	18C346C032	18C346C032	18C346C032_2	10.5
Royal_Royce_x_Tangi	18C346C036	18C346C036	18C346C036	7.5
Royal_Royce_x_Tangi	18C346C040	18C346C040	18C346C040_1	9.5
Royal_Royce_x_Tangi	18C346C041	18C346C041	18C346C041_1	8.5
Royal_Royce_x_Tangi	18C346C038	18C346C038	18C346C038_1	7.5
Royal_Royce_x_Tangi	18C346C037	18C346C037	18C346C037_1	7
Royal_Royce_x_Tangi	18C346C039	18C346C039	18C346C039_3	9.5
Royal_Royce_x_Tangi	18C346C077	18C346C077	18C346C077_2	NA
Royal_Royce_x_Tangi	18C346C069	18C346C069	18C346C069	8.5
Royal_Royce_x_Tangi	18C346C022	18C346C022	18C346C022	9.5
Royal_Royce_x_Tangi	18C346C012	18C346C012	18C346C012_2	10.5
Royal_Royce_x_Tangi	18C346C089	18C346C089	18C346C089	8
Royal_Royce_x_Tangi	18C346C079	18C346C079	18C346C079_2	NA
Royal_Royce_x_Tangi	18C346C026	18C346C026	18C346C026_3	11
Royal_Royce_x_Tangi	18C346C050	18C346C050	18C346C050	8.5
Royal_Royce_x_Tangi	18C346C053	18C346C053	18C346C053_1	8.5
Royal_Royce_x_Tangi	18C346C062	18C346C062	18C346C062_1	8
Royal_Royce_x_Tangi	18C346C068	18C346C068	18C346C068_2	7
Royal_Royce_x_Tangi	18C346C024	18C346C024	18C346C024_3	11.5
Royal_Royce_x_Tangi	18C346C023	18C346C023	18C346C023	11
Royal_Royce_x_Tangi	18C346C041	18C346C041	18C346C041_2	9.5
Royal_Royce_x_Tangi	18C346C099	18C346C099	18C346C099	9.5
Royal_Royce_x_Tangi	18C346C099	18C346C099	18C346C099_1	9
Royal_Royce_x_Tangi	18C346C062	18C346C062	18C346C062_2	8.5
Royal_Royce_x_Tangi	18C346C029	18C346C029	18C346C029	10.5
Royal_Royce_x_Tangi	18C346C046	18C346C046	18C346C046	7.5
Royal_Royce_x_Tangi	18C346C045	18C346C045	18C346C045_2	7.5
Royal_Royce_x_Tangi	18C346C044	18C346C044	18C346C044	8.5
Royal_Royce_x_Tangi	18C346C050	18C346C050	18C346C050_1	7
Royal_Royce_x_Tangi	18C346C038	18C346C038	18C346C038_2	9
Royal_Royce_x_Tangi	18C346C092	18C346C092	18C346C092_1	7.5
Royal_Royce_x_Tangi	18C346C056	18C346C056	18C346C056	7.5
Royal_Royce_x_Tangi	18C346C062	18C346C062	18C346C062_3	7
Royal_Royce_x_Tangi	18C346C021	18C346C021	18C346C021	7.5
Royal_Royce_x_Tangi	18C346C086	18C346C086	18C346C086_2	8.5
Royal_Royce_x_Tangi	18C346C032	18C346C032	18C346C032_3	11.5
Royal_Royce_x_Tangi	18C346C026	18C346C026	18C346C026_4	8.5
Royal_Royce_x_Tangi	18C346C029	18C346C029	18C346C029_1	9.5
Royal_Royce_x_Tangi	18C346C040	18C346C040	18C346C040_2	8
Royal_Royce_x_Tangi	18C346C040	18C346C040	18C346C040_3	9.5
Royal_Royce_x_Tangi	18C346C039	18C346C039	18C346C039_4	9.5
Royal_Royce_x_Tangi	18C346C093	18C346C093	18C346C093	7
Royal_Royce_x_Tangi	18C346C066	18C346C066	18C346C066_1	8
Royal_Royce_x_Tangi	18C346C068	18C346C068	18C346C068_3	8
Royal_Royce_x_Tangi	18C346C004	18C346C004	18C346C004_2	7.5
Royal_Royce_x_Tangi	18C346C082	18C346C082	18C346C082	8.5
Royal_Royce_x_Tangi	18C346C033	18C346C033	18C346C033	9
Royal_Royce_x_Tangi	18C346C050	18C346C050	18C346C050_2	8
Royal_Royce_x_Tangi	18C346C093	18C346C093	18C346C093_1	7.5
Royal_Royce_x_Tangi	18C346C069	18C346C069	18C346C069_1	8.5
Royal_Royce_x_Tangi	18C346C071	18C346C071	18C346C071	8
Royal_Royce_x_Tangi	18C346C072	18C346C072	18C346C072	9.5
Royal_Royce_x_Tangi	18C346C011	18C346C011	18C346C011	8
Royal_Royce_x_Tangi	18C346C069	18C346C069	18C346C069_2	9.5
Royal_Royce_x_Tangi	18C346C075	18C346C075	18C346C075_1	10
Royal_Royce_x_Tangi	18C346C004	18C346C004	18C346C004_3	8.5
Royal_Royce_x_Tangi	18C346C016	18C346C016	18C346C016_3	7
Royal_Royce_x_Tangi	18C346C025	18C346C025	18C346C025_2	8
Royal_Royce_x_Tangi	18C346C032	18C346C032	18C346C032_4	9.5
Royal_Royce_x_Tangi	18C346C026	18C346C026	18C346C026_5	9.5
Royal_Royce_x_Tangi	18C346C047	18C346C047	18C346C047	7
Royal_Royce_x_Tangi	18C346C049	18C346C049	18C346C049_1	7
Royal_Royce_x_Tangi	18C346C040	18C346C040	18C346C040_4	7.5
Royal_Royce_x_Tangi	18C346C060	18C346C060	18C346C060	7
Royal_Royce_x_Tangi	18C346C069	18C346C069	18C346C069_3	9.5
Royal_Royce_x_Tangi	18C346C070	18C346C070	18C346C070_2	8
Royal_Royce_x_Tangi	18C346C068	18C346C068	18C346C068_4	7
Royal_Royce_x_Tangi	18C346C068	18C346C068	18C346C068_5	7
Royal_Royce_x_Tangi	18C346C077	18C346C077	18C346C077_3	11.5
Royal_Royce_x_Tangi	18C346C072	18C346C072	18C346C072_1	10.5
Royal_Royce_x_Tangi	18C346C005	18C346C005	18C346C005_2	7
Royal_Royce_x_Tangi	18C346C004	18C346C004	18C346C004_4	9
Royal_Royce_x_Tangi	18C346C086	18C346C086	18C346C086_3	7.5
Royal_Royce_x_Tangi	18C346C039	18C346C039	18C346C039_5	8
Royal_Royce_x_Tangi	18C346C039	18C346C039	18C346C039_6	9.5
Royal_Royce_x_Tangi	18C346C086	18C346C086	18C346C086_4	7
Royal_Royce_x_Tangi	18C346C081	18C346C081	18C346C081_1	6
Royal_Royce_x_Tangi	18C346C040	18C346C040	18C346C040_5	8.5
Royal_Royce_x_Tangi	18C346C063	18C346C063	18C346C063	7.5
Royal_Royce_x_Tangi	18C346C067	18C346C067	18C346C067_1	8
Royal_Royce_x_Tangi	18C346C077	18C346C077	18C346C077_4	7.5
Royal_Royce_x_Tangi	18C346C020	18C346C020	18C346C020	7
Royal_Royce_x_Tangi	18C346C022	18C346C022	18C346C022_1	8
Royal_Royce_x_Tangi	18C346C086	18C346C086	18C346C086_5	8
Royal_Royce_x_Tangi	18C346C034	18C346C034	18C346C034_5	8.5
Royal_Royce_x_Tangi	18C346C049	18C346C049	18C346C049_2	7.5
Royal_Royce_x_Tangi	18C346C091	18C346C091	18C346C091	8.5
Royal_Royce_x_Tangi	18C346C093	18C346C093	18C346C093_2	8.5
Royal_Royce_x_Tangi	18C346C092	18C346C092	18C346C092_2	9.5
Royal_Royce_x_Tangi	18C346C092	18C346C092	18C346C092_3	9.5
Royal_Royce_x_Tangi	18C346C099	18C346C099	18C346C099_2	7
Royal_Royce_x_Tangi	18C346C056	18C346C056	18C346C056_1	7.5
Royal_Royce_x_Tangi	18C346C064	18C346C064	18C346C064_1	9.5
Royal_Royce_x_Tangi	18C346C066	18C346C066	18C346C066_2	8.5
Royal_Royce_x_Tangi	18C346C021	18C346C021	18C346C021_1	8.5
Royal_Royce_x_Tangi	18C346C086	18C346C086	18C346C086_6	8
Royal_Royce_x_Tangi	18C346C025	18C346C025	18C346C025_3	8.5
Royal_Royce_x_Tangi	18C346C034	18C346C034	18C346C034_6	8
Royal_Royce_x_Tangi	18C346C050	18C346C050	18C346C050_3	8
Royal_Royce_x_Tangi	18C346C093	18C346C093	18C346C093_3	8
Royal_Royce_x_Tangi	18C346C092	18C346C092	18C346C092_4	7.5
Royal_Royce_x_Tangi	18C346C097	18C346C097	18C346C097_1	7.5
Royal_Royce_x_Tangi	18C346C066	18C346C066	18C346C066_3	7
Royal_Royce_x_Tangi	18C346C003	18C346C003	18C346C003_2	7.5
Royal_Royce_x_Tangi	18C346C081	18C346C081	18C346C081_2	8
Royal_Royce_x_Tangi	18C346C079	18C346C079	18C346C079_3	9.5
Royal_Royce_x_Tangi	18C346C050	18C346C050	18C346C050_4	8.5
Royal_Royce_x_Tangi	18C346C043	18C346C043	18C346C043_1	7.5
Royal_Royce_x_Tangi	18C346C038	18C346C038	18C346C038_3	7.5
Royal_Royce_x_Tangi	18C346C079	18C346C079	18C346C079_4	8
Royal_Royce_x_Tangi	18C346C026	18C346C026	18C346C026_6	9
Royal_Royce_x_Tangi	18C346C049	18C346C049	18C346C049_3	7
Royal_Royce_x_Tangi	18C346C058	18C346C058	18C346C058	7
Royal_Royce_x_Tangi	18C346C069	18C346C069	18C346C069_4	8.5
Royal_Royce_x_Tangi	18C346C016	18C346C016	18C346C016_4	7
Royal_Royce_x_Tangi	18C346C024	18C346C024	18C346C024_4	NA
Royal_Royce_x_Tangi	18C346C023	18C346C023	18C346C023_1	8.5
Royal_Royce_x_Tangi	18C346C082	18C346C082	18C346C082_1	6
Royal_Royce_x_Tangi	18C346C034	18C346C034	18C346C034_7	8
Royal_Royce_x_Tangi	18C346C029	18C346C029	18C346C029_2	9
Royal_Royce_x_Tangi	18C346C049	18C346C049	18C346C049_4	8
Royal_Royce_x_Tangi	18C346C093	18C346C093	18C346C093_4	9
Royal_Royce_x_Tangi	18C346C096	18C346C096	18C346C096	8
Royal_Royce_x_Tangi	18C346C069	18C346C069	18C346C069_5	7
Royal_Royce_x_Tangi	18C346C083	18C346C083	18C346C083	8.5
Royal_Royce_x_Tangi	18C346C082	18C346C082	18C346C082_2	8
Royal_Royce_x_Tangi	18C346C025	18C346C025	18C346C025_4	8.5
Royal_Royce_x_Tangi	18C346C043	18C346C043	18C346C043_2	6
Royal_Royce_x_Tangi	18C346C091	18C346C091	18C346C091_1	8.5
Royal_Royce_x_Tangi	18C346C061	18C346C061	18C346C061	8.5
Royal_Royce_x_Tangi	18C346C071	18C346C071	18C346C071_1	8
Royal_Royce_x_Tangi	18C346C078	18C346C078	18C346C078	8.5
Royal_Royce_x_Tangi	18C346C009	18C346C009	18C346C009	7
Royal_Royce_x_Tangi	18C346C023	18C346C023	18C346C023_2	9
Royal_Royce_x_Tangi	18C346C079	18C346C079	18C346C079_5	8.5
Royal_Royce_x_Tangi	18C346C082	18C346C082	18C346C082_3	6
Royal_Royce_x_Tangi	18C346C028	18C346C028	18C346C028	8.5
Royal_Royce_x_Tangi	18C346C047	18C346C047	18C346C047_1	10.5
Royal_Royce_x_Tangi	18C346C095	18C346C095	18C346C095	7
Royal_Royce_x_Tangi	18C346C097	18C346C097	18C346C097_2	7.5
Royal_Royce_x_Tangi	18C346C071	18C346C071	18C346C071_2	9.5
Royal_Royce_x_Tangi	18C346C071	18C346C071	18C346C071_3	8.5
Royal_Royce_x_Tangi	18C346C082	18C346C082	18C346C082_4	8
Royal_Royce_x_Tangi	18C346C034	18C346C034	18C346C034_8	7
Royal_Royce_x_Tangi	18C346C093	18C346C093	18C346C093_5	8.5
Royal_Royce_x_Tangi	18C346C067	18C346C067	18C346C067_2	7
Royal_Royce_x_Tangi	18C346C076	18C346C076	18C346C076	7
Royal_Royce_x_Tangi	18C346C073	18C346C073	18C346C073	9.5
Royal_Royce_x_Tangi	18C346C072	18C346C072	18C346C072_2	7
Royal_Royce_x_Tangi	18C346C072	18C346C072	18C346C072_3	7
Royal_Royce_x_Tangi	18C346C074	18C346C074	18C346C074_1	7
Royal_Royce_x_Tangi	18C346C009	18C346C009	18C346C009_1	7
Royal_Royce_x_Tangi	18C346C082	18C346C082	18C346C082_5	7
Royal_Royce_x_Tangi	18C346C044	18C346C044	18C346C044_1	8
Royal_Royce_x_Tangi	18C346C043	18C346C043	18C346C043_3	8.5
Royal_Royce_x_Tangi	18C346C091	18C346C091	18C346C091_2	8.5
Royal_Royce_x_Tangi	18C346C099	18C346C099	18C346C099_3	8
Royal_Royce_x_Tangi	18C346C058	18C346C058	18C346C058_1	9
Royal_Royce_x_Tangi	18C346C072	18C346C072	18C346C072_4	10.5
Royal_Royce_x_Tangi	18C346C072	18C346C072	18C346C072_5	8.5
Royal_Royce_x_Tangi	18C346C022	18C346C022	18C346C022_2	8.5
Royal_Royce_x_Tangi	18C346C085	18C346C085	18C346C085	8.5
Royal_Royce_x_Tangi	18C346C044	18C346C044	18C346C044_2	7
Royal_Royce_x_Tangi	18C346C048	18C346C048	18C346C048	8.5
Royal_Royce_x_Tangi	18C346C099	18C346C099	18C346C099_4	7
Royal_Royce_x_Tangi	18C346C097	18C346C097	18C346C097_3	7.5
Royal_Royce_x_Tangi	18C346C056	18C346C056	18C346C056_2	7
Royal_Royce_x_Tangi	18C346C078	18C346C078	18C346C078_1	7
Royal_Royce_x_Tangi	18C346C073	18C346C073	18C346C073_1	7
Royal_Royce_x_Tangi	18C346C030	18C346C030	18C346C030	9.5
Royal_Royce_x_Tangi	18C346C052	18C346C052	18C346C052	8
Royal_Royce_x_Tangi	18C346C058	18C346C058	18C346C058_2	7.5
Royal_Royce_x_Tangi	18C346C083	18C346C083	18C346C083_1	8.5
Royal_Royce_x_Tangi	18C346C024	18C346C024	18C346C024_5	12
Royal_Royce_x_Tangi	18C346C089	18C346C089	18C346C089_1	7.5
Royal_Royce_x_Tangi	18C346C083	18C346C083	18C346C083_2	9.5
Royal_Royce_x_Tangi	18C346C034	18C346C034	18C346C034_9	8.5
Royal_Royce_x_Tangi	18C346C050	18C346C050	18C346C050_5	8
Royal_Royce_x_Tangi	18C346C037	18C346C037	18C346C037_2	9.5
Royal_Royce_x_Tangi	18C346C037	18C346C037	18C346C037_3	7.5
Royal_Royce_x_Tangi	18C346C098	18C346C098	18C346C098	8.5
Royal_Royce_x_Tangi	18C346C054	18C346C054	18C346C054	8.5
Royal_Royce_x_Tangi	18C346C061	18C346C061	18C346C061_1	8.5
Royal_Royce_x_Tangi	18C346C063	18C346C063	18C346C063_1	NA
Royal_Royce_x_Tangi	18C346C073	18C346C073	18C346C073_2	9.5
Royal_Royce_x_Tangi	18C346C029	18C346C029	18C346C029_3	8.5
Royal_Royce_x_Tangi	18C346C048	18C346C048	18C346C048_1	9
Royal_Royce_x_Tangi	18C346C097	18C346C097	18C346C097_4	7
Royal_Royce_x_Tangi	18C346C056	18C346C056	18C346C056_3	8
Royal_Royce_x_Tangi	18C346C078	18C346C078	18C346C078_2	8
Royal_Royce_x_Tangi	18C346C020	18C346C020	18C346C020_1	7
Royal_Royce_x_Tangi	18C346C086	18C346C086	18C346C086_7	7.5
Royal_Royce_x_Tangi	18C346C085	18C346C085	18C346C085_1	8
Royal_Royce_x_Tangi	18C346C046	18C346C046	18C346C046_1	8.5
Royal_Royce_x_Tangi	18C346C053	18C346C053	18C346C053_2	7.5
Royal_Royce_x_Tangi	18C346C071	18C346C071	18C346C071_4	8
Royal_Royce_x_Tangi	18C346C078	18C346C078	18C346C078_3	9
Royal_Royce_x_Tangi	18C346C072	18C346C072	18C346C072_6	8
Royal_Royce_x_Tangi	18C346C020	18C346C020	18C346C020_2	7
Royal_Royce_x_Tangi	18C346C023	18C346C023	18C346C023_3	8
Royal_Royce_x_Tangi	18C346C044	18C346C044	18C346C044_3	7
Royal_Royce_x_Tangi	18C346C054	18C346C054	18C346C054_1	7
Royal_Royce_x_Tangi	18C346C064	18C346C064	18C346C064_2	8.5
Royal_Royce_x_Tangi	18C346C073	18C346C073	18C346C073_3	7
Royal_Royce_x_Tangi	18C346C048	18C346C048	18C346C048_2	8.5
Royal_Royce_x_Tangi	18C346C048	18C346C048	18C346C048_3	7
Royal_Royce_x_Tangi	18C346C023	18C346C023	18C346C023_4	8
Royal_Royce_x_Tangi	18C346C099	18C346C099	18C346C099_5	7
Royal_Royce_x_Tangi	18C346C054	18C346C054	18C346C054_2	7
Royal_Royce_x_Tangi	18C346C063	18C346C063	18C346C063_2	7
Royal_Royce_x_Tangi	18C346C079	18C346C079	18C346C079_6	7
Royal_Royce_x_Tangi	18C346C030	18C346C030	18C346C030_1	9.5
Royal_Royce_x_Tangi	18C346C049	18C346C049	18C346C049_5	7.5
Royal_Royce_x_Tangi	18C346C037	18C346C037	18C346C037_4	7
Royal_Royce_x_Tangi	18C346C056	18C346C056	18C346C056_4	7
Royal_Royce_x_Tangi	18C346C054	18C346C054	18C346C054_3	8
Royal_Royce_x_Tangi	18C346C078	18C346C078	18C346C078_4	8.5
Royal_Royce_x_Tangi	18C346C023	18C346C023	18C346C023_5	8
Royal_Royce_x_Tangi	18C346C048	18C346C048	18C346C048_4	8.5
Royal_Royce_x_Tangi	18C346C097	18C346C097	18C346C097_5	7
Royal_Royce_x_Tangi	18C346C045	18C346C045	18C346C045_3	8
Royal_Royce_x_Tangi	18C346C050	18C346C050	18C346C050_6	8
Royal_Royce_x_Tangi	18C346C097	18C346C097	18C346C097_6	7.5
Royal_Royce_x_Tangi	18C346C067	18C346C067	18C346C067_3	7
Royal_Royce_x_Tangi	18C346C073	18C346C073	18C346C073_4	9.5
Royal_Royce_x_Tangi	18C346C035	18C346C035	18C346C035	7.5
Royal_Royce_x_Tangi	18C346C067	18C346C067	18C346C067_4	6
Royal_Royce_x_Tangi	18C346C076	18C346C076	18C346C076_1	6
Royal_Royce_x_Tangi	18C346C089	18C346C089	18C346C089_2	6
Royal_Royce_x_Tangi	18C346C073	18C346C073	18C346C073_5	7
Royal_Royce_x_Tangi	18C346C050	18C346C050	18C346C050_7	7
Royal_Royce_x_Tangi	18C346C095	18C346C095	18C346C095_1	7
Royal_Royce_x_Tangi	18C346C053	18C346C053	18C346C053_3	7
Royal_Royce_x_Tangi	18C346C073	18C346C073	18C346C073_6	7.5
Royal_Royce_x_Tangi	18C346C098	18C346C098	18C346C098_1	7.5
Royal_Royce_x_Tangi	18C346C098	18C346C098	18C346C098_2	6
Royal_Royce_x_Tangi	18C346C095	18C346C095	18C346C095_2	7
Royal_Royce_x_Tangi	18C346C096	18C346C096	18C346C096_1	7.5
Royal_Royce_x_Tangi	18C346C059	18C346C059	18C346C059	7
Royal_Royce_x_Tangi	18C346C085	18C346C085	18C346C085_2	7
Royal_Royce_x_Tangi	18C346C072	18C346C072	18C346C072_7	8.5
Royal_Royce_x_Tangi	18C346C030	18C346C030	18C346C030_2	9.5
Royal_Royce_x_Tangi	18C346C096	18C346C096	18C346C096_2	6
Royal_Royce_x_Tangi	18C346C059	18C346C059	18C346C059_1	7
Royal_Royce_x_Tangi	18C346C030	18C346C030	18C346C030_3	9
Royal_Royce_x_Tangi	18C346C096	18C346C096	18C346C096_3	7
Royal_Royce_x_Tangi	18C346C030	18C346C030	18C346C030_4	8.5
Royal_Royce_x_Tangi	18C346C044	18C346C044	18C346C044_4	8
Royal_Royce_x_Tangi	18C346C097	18C346C097	18C346C097_7	7.5
Royal_Royce_x_Tangi	18C346C053	18C346C053	18C346C053_4	6
Royal_Royce_x_Tangi	18C346C059	18C346C059	18C346C059_2	6
Royal_Royce_x_Tangi	18C346C048	18C346C048	18C346C048_5	8.5
Royal_Royce_x_Tangi	18C346C030	18C346C030	18C346C030_5	8.5
Royal_Royce_x_Tangi	18C346C030	18C346C030	18C346C030_6	8.5
Royal_Royce_x_Tangi	18C346C045	18C346C045	18C346C045_4	7
Royal_Royce_x_Tangi	18C346C053	18C346C053	18C346C053_5	7
Royal_Royce_x_Tangi	18C346C078	18C346C078	18C346C078_5	8
Royal_Royce_x_Tangi	18C346C073	18C346C073	18C346C073_7	7
Royal_Royce_x_Tangi	18C346C050	18C346C050	18C346C050_8	7.5
Royal_Royce_x_Tangi	18C346C035	18C346C035	18C346C035_1	8
Royal_Royce_x_Tangi	18C346C052	18C346C052	18C346C052_1	7
Royal_Royce_x_Tangi	18C346C052	18C346C052	18C346C052_2	7
Royal_Royce_x_Tangi	18C346C088	18C346C088	18C346C088	8
Royal_Royce_x_Tangi	18C346C046	18C346C046	18C346C046_2	6
Royal_Royce_x_Tangi	18C346C096	18C346C096	18C346C096_4	NA
Royal_Royce_x_Tangi	18C346C069	18C346C069	18C346C069_6	NA
Royal_Royce_x_Tangi	18C346C070	18C346C070	18C346C070_3	NA
Royal_Royce_x_Tangi	18C346C009	18C346C009	18C346C009_2	NA
Royal_Royce_x_Tangi	18C346C006	18C346C006	18C346C006_3	NA
Royal_Royce_x_Tangi	18C346C020	18C346C020	18C346C020_3	7
Royal_Royce_x_Tangi	18C346C086	18C346C086	18C346C086_8	NA
Royal_Royce_x_Tangi	18C346C095	18C346C095	18C346C095_3	7
Royal_Royce_x_Tangi	18C346C096	18C346C096	18C346C096_5	7
Royal_Royce_x_Tangi	18C346C053	18C346C053	18C346C053_6	NA
Royal_Royce_x_Tangi	18C346C010	18C346C010	18C346C010_6	6
Royal_Royce_x_Tangi	18C346C089	18C346C089	18C346C089_3	7
Royal_Royce_x_Tangi	18C346C178	18C346C178	18C346C178	7.5
Royal_Royce_x_Tangi	18C346C179	18C346C179	18C346C179	7
Royal_Royce_x_Tangi	18C346C179	18C346C179	18C346C179_1	8.5
Royal_Royce_x_Tangi	18C346C179	18C346C179	18C346C179_2	7
Royal_Royce_x_Tangi	18C346C231	18C346C231	18C346C231	9.5
Royal_Royce_x_Tangi	18C346C231	18C346C231	18C346C231_1	8.5
Royal_Royce_x_Tangi	18C346C231	18C346C231	18C346C231_2	7.5
Royal_Royce_x_Tangi	18C346C231	18C346C231	18C346C231_3	9
Royal_Royce_x_Tangi	18C346C227	18C346C227	18C346C227	9
Royal_Royce_x_Tangi	18C346C227	18C346C227	18C346C227_1	9.5
Royal_Royce_x_Tangi	18C346C227	18C346C227	18C346C227_2	8.5
Royal_Royce_x_Tangi	18C346C226	18C346C226	18C346C226	7.5
Royal_Royce_x_Tangi	18C346C225	18C346C225	18C346C225	9
Royal_Royce_x_Tangi	18C346C225	18C346C225	18C346C225_1	8.5
Royal_Royce_x_Tangi	18C346C224	18C346C224	18C346C224	7.5
Royal_Royce_x_Tangi	18C346C224	18C346C224	18C346C224_1	8
Royal_Royce_x_Tangi	18C346C224	18C346C224	18C346C224_2	9
Royal_Royce_x_Tangi	18C346C224	18C346C224	18C346C224_3	8.5
Royal_Royce_x_Tangi	18C346C224	18C346C224	18C346C224_4	8
Royal_Royce_x_Tangi	18C346C229	18C346C229	18C346C229	6.5
Royal_Royce_x_Tangi	18C346C228	18C346C228	18C346C228	6.5
Royal_Royce_x_Tangi	18C346C228	18C346C228	18C346C228_1	8.5
Royal_Royce_x_Tangi	18C346C228	18C346C228	18C346C228_2	8.5
Royal_Royce_x_Tangi	18C346C133	18C346C133	18C346C133	9
Royal_Royce_x_Tangi	18C346C142	18C346C142	18C346C142	7
Royal_Royce_x_Tangi	18C346C142	18C346C142	18C346C142_1	8.5
Royal_Royce_x_Tangi	18C346C141	18C346C141	18C346C141	7.5
Royal_Royce_x_Tangi	18C346C143	18C346C143	18C346C143	7.5
Royal_Royce_x_Tangi	18C346C138	18C346C138	18C346C138	8.5
Royal_Royce_x_Tangi	18C346C138	18C346C138	18C346C138_1	8.5
Royal_Royce_x_Tangi	18C346C186	18C346C186	18C346C186	10
Royal_Royce_x_Tangi	18C346C186	18C346C186	18C346C186_1	9.5
Royal_Royce_x_Tangi	18C346C186	18C346C186	18C346C186_2	11
Royal_Royce_x_Tangi	18C346C186	18C346C186	18C346C186_3	10.5
Royal_Royce_x_Tangi	18C346C186	18C346C186	18C346C186_4	9.5
Royal_Royce_x_Tangi	18C346C181	18C346C181	18C346C181	9
Royal_Royce_x_Tangi	18C346C181	18C346C181	18C346C181_1	7
Royal_Royce_x_Tangi	18C346C183	18C346C183	18C346C183	7
Royal_Royce_x_Tangi	18C346C183	18C346C183	18C346C183_1	6.5
Royal_Royce_x_Tangi	18C346C187	18C346C187	18C346C187	6
Royal_Royce_x_Tangi	18C346C187	18C346C187	18C346C187_1	8.5
Royal_Royce_x_Tangi	18C346C187	18C346C187	18C346C187_2	7
Royal_Royce_x_Tangi	18C346C184	18C346C184	18C346C184	9
Royal_Royce_x_Tangi	18C346C185	18C346C185	18C346C185	8
Royal_Royce_x_Tangi	18C346C185	18C346C185	18C346C185_1	8
Royal_Royce_x_Tangi	18C346C188	18C346C188	18C346C188	9.5
Royal_Royce_x_Tangi	18C346C188	18C346C188	18C346C188_1	7
Royal_Royce_x_Tangi	18C346C188	18C346C188	18C346C188_2	7
Royal_Royce_x_Tangi	18C346C185	18C346C185	18C346C185_2	7.5
Royal_Royce_x_Tangi	18C346C189	18C346C189	18C346C189	7
Royal_Royce_x_Tangi	18C346C164	18C346C164	18C346C164	8
Royal_Royce_x_Tangi	18C346C157	18C346C157	18C346C157	7
Royal_Royce_x_Tangi	18C346C157	18C346C157	18C346C157_1	7.5
Royal_Royce_x_Tangi	18C346C161	18C346C161	18C346C161	7
Royal_Royce_x_Tangi	18C346C158	18C346C158	18C346C158	6.5
Royal_Royce_x_Tangi	18C346C162	18C346C162	18C346C162	7
Royal_Royce_x_Tangi	18C346C192	18C346C192	18C346C192	6.5
Royal_Royce_x_Tangi	18C346C193	18C346C193	18C346C193	6.5
Royal_Royce_x_Tangi	18C346C191	18C346C191	18C346C191	7
Royal_Royce_x_Tangi	18C346C191	18C346C191	18C346C191_1	7
Royal_Royce_x_Tangi	18C346C190	18C346C190	18C346C190	9
Royal_Royce_x_Tangi	18C346C190	18C346C190	18C346C190_1	8.5
Royal_Royce_x_Tangi	18C346C195	18C346C195	18C346C195	8
Royal_Royce_x_Tangi	18C346C194	18C346C194	18C346C194	6.5
Royal_Royce_x_Tangi	18C346C199	18C346C199	18C346C199	8
Royal_Royce_x_Tangi	18C346C199	18C346C199	18C346C199_1	8.5
Royal_Royce_x_Tangi	18C346C199	18C346C199	18C346C199_2	8.5
Royal_Royce_x_Tangi	18C346C197	18C346C197	18C346C197	6.5
Royal_Royce_x_Tangi	18C346C174	18C346C174	18C346C174	8.5
Royal_Royce_x_Tangi	18C346C171	18C346C171	18C346C171	8
Royal_Royce_x_Tangi	18C346C171	18C346C171	18C346C171_1	7.5
Royal_Royce_x_Tangi	18C346C175	18C346C175	18C346C175	9
Royal_Royce_x_Tangi	18C346C175	18C346C175	18C346C175_1	7.5
Royal_Royce_x_Tangi	18C346C175	18C346C175	18C346C175_2	8.5
Royal_Royce_x_Tangi	18C346C172	18C346C172	18C346C172	8.5
Royal_Royce_x_Tangi	18C346C172	18C346C172	18C346C172_1	8
Royal_Royce_x_Tangi	18C346C172	18C346C172	18C346C172_2	10
Royal_Royce_x_Tangi	18C346C172	18C346C172	18C346C172_3	9
Royal_Royce_x_Tangi	18C346C166	18C346C166	18C346C166	6.5
Royal_Royce_x_Tangi	18C346C166	18C346C166	18C346C166_1	8.5
Royal_Royce_x_Tangi	18C346C170	18C346C170	18C346C170	9.5
Royal_Royce_x_Tangi	18C346C167	18C346C167	18C346C167	6.5
Royal_Royce_x_Tangi	18C346C165	18C346C165	18C346C165	6.5
Royal_Royce_x_Tangi	18C346C248	18C346C248	18C346C248	6.5
Royal_Royce_x_Tangi	18C346C244	18C346C244	18C346C244	6.5
Royal_Royce_x_Tangi	18C346C246	18C346C246	18C346C246	8
Royal_Royce_x_Tangi	18C346C246	18C346C246	18C346C246_1	8.5
Royal_Royce_x_Tangi	18C346C246	18C346C246	18C346C246_2	10
Royal_Royce_x_Tangi	18C346C114	18C346C114	18C346C114	6.5
Royal_Royce_x_Tangi	18C346C114	18C346C114	18C346C114_1	6.5
Royal_Royce_x_Tangi	18C346C112	18C346C112	18C346C112	7.5
Royal_Royce_x_Tangi	18C346C112	18C346C112	18C346C112_1	8
Royal_Royce_x_Tangi	18C346C112	18C346C112	18C346C112_2	8
Royal_Royce_x_Tangi	18C346C117	18C346C117	18C346C117	7.5
Royal_Royce_x_Tangi	18C346C118	18C346C118	18C346C118	6.5
Royal_Royce_x_Tangi	18C346C118	18C346C118	18C346C118_1	9.5
Royal_Royce_x_Tangi	18C346C118	18C346C118	18C346C118_2	9
Royal_Royce_x_Tangi	18C346C118	18C346C118	18C346C118_3	7.5
Royal_Royce_x_Tangi	18C346C116	18C346C116	18C346C116	8
Royal_Royce_x_Tangi	18C346C116	18C346C116	18C346C116_1	7
Royal_Royce_x_Tangi	18C346C113	18C346C113	18C346C113	9.5
Royal_Royce_x_Tangi	18C346C113	18C346C113	18C346C113_1	8
Royal_Royce_x_Tangi	18C346C113	18C346C113	18C346C113_2	8
Royal_Royce_x_Tangi	18C346C113	18C346C113	18C346C113_3	7.5
Royal_Royce_x_Tangi	18C346C239	18C346C239	18C346C239	9.5
Royal_Royce_x_Tangi	18C346C239	18C346C239	18C346C239_1	8.5
Royal_Royce_x_Tangi	18C346C240	18C346C240	18C346C240	6.5
Royal_Royce_x_Tangi	18C346C232	18C346C232	18C346C232	7.5
Royal_Royce_x_Tangi	18C346C232	18C346C232	18C346C232_1	8
Royal_Royce_x_Tangi	18C346C232	18C346C232	18C346C232_2	8.5
Royal_Royce_x_Tangi	18C346C232	18C346C232	18C346C232_3	8.5
Royal_Royce_x_Tangi	18C346C233	18C346C233	18C346C233	8
Royal_Royce_x_Tangi	18C346C233	18C346C233	18C346C233_1	8
Royal_Royce_x_Tangi	18C346C233	18C346C233	18C346C233_2	8.5
Royal_Royce_x_Tangi	18C346C233	18C346C233	18C346C233_3	8
Royal_Royce_x_Tangi	18C346C234	18C346C234	18C346C234	6
Royal_Royce_x_Tangi	18C346C234	18C346C234	18C346C234_1	6.5
Royal_Royce_x_Tangi	18C346C211	18C346C211	18C346C211	6.5
Royal_Royce_x_Tangi	18C346C203	18C346C203	18C346C203	8
Royal_Royce_x_Tangi	18C346C203	18C346C203	18C346C203_1	7.5
Royal_Royce_x_Tangi	18C346C203	18C346C203	18C346C203_2	8
Royal_Royce_x_Tangi	18C346C205	18C346C205	18C346C205	7.5
Royal_Royce_x_Tangi	18C346C205	18C346C205	18C346C205_1	6.5
Royal_Royce_x_Tangi	18C346C205	18C346C205	18C346C205_2	7.5
Royal_Royce_x_Tangi	18C346C205	18C346C205	18C346C205_3	6.5
Royal_Royce_x_Tangi	18C346C205	18C346C205	18C346C205_4	8
Royal_Royce_x_Tangi	18C346C210	18C346C210	18C346C210	8
Royal_Royce_x_Tangi	18C346C210	18C346C210	18C346C210_1	8.5
Royal_Royce_x_Tangi	18C346C210	18C346C210	18C346C210_2	8.5
Royal_Royce_x_Tangi	18C346C206	18C346C206	18C346C206	9.5
Royal_Royce_x_Tangi	18C346C206	18C346C206	18C346C206_1	8
Royal_Royce_x_Tangi	18C346C202	18C346C202	18C346C202	7.5
Royal_Royce_x_Tangi	18C346C126	18C346C126	18C346C126	6.5
Royal_Royce_x_Tangi	18C346C126	18C346C126	18C346C126_1	6
Royal_Royce_x_Tangi	18C346C131	18C346C131	18C346C131	9
Royal_Royce_x_Tangi	18C346C131	18C346C131	18C346C131_1	9
[truncated: 907 more rows]
